# Supplementary material for: The spectrum of tuberculosis described as differential DNA methylation patterns in alveolar macrophages and alveolar T cells
Source: Clin Epigenetics. 2022 Dec 17;14:175. doi: 10.1186/s13148-022-01390-9 (PMC9758029; doi:10.1186/s13148-022-01390-9)
Supplement: Supplementary file 9 — Additional file 9. Supplemental table S1. Differentially methylated CpG sites (DMCs) from analyses in alveolar macrophages for TB status. Merged list of DMCs from Pat, Exp and Con contrasts using absolute MMD > 0.2 and Ajd.p-val < 0.05. Supplemental table S2. Differentially methylated CpG sites (DMCs) from analyses in alveolar T cells for TB status. Merged list of DMCs from Pat, Exp and Con contrasts using absolute MMD > 0.2 and Ajd.p-val < 0.05. Supplemental table S3. Differentially methylated CpG sites (DMCs) identified between Linköping and Lima patient samples (n= 2+2) in Alveolar T cells with Adj.p-val <0.1. (No DMCs identified in HLA-DR). Supplemental table S4. Common Differentially methylated Genes (DMGs) from analyses in alveolar macrophages and T cells for TB status. Using relaxed cutoffs MMD > 0.1 and Ajd.p-val < 0.05. Supplemental table S5. Differentially methylated CpG sites (DMCs) identified in alveolar macrophages for IGRA status with MMD >0.1, Ajd.p-val < 0.05. Supplemental table S6. Differentially methylated CpG sites (DMC) identified in alveolar T cells for IGRA status with MMD >0.1, Ajd.p-val< 0.05. [file 13148_2022_1390_MOESM9_ESM.xlsx]

## Sheet: Info
		Supplmentary Tables
		Supplementary Table S1. Differentially methylated CpG sites (DMCs) from analyses in Alveolar macrophages for TB status. Merged list of DMCs from Pat, Exp and Con contrasts using absolute MMD > 0.2 and Ajd.p-val < 0.05.
		Supplementary Table S2. Differentially methylated CpG sites (DMCs) from analyses in Alveolar T cells for TB status . Merged list of DMCs from Pat, Exp and Con contrasts using absolute MMD > 0.2 and Ajd.p-val < 0.05.
		Supplementary Table S3. Differentially methylated CpG sites (DMCs) identified between Linköping and Lima Patient samples (n= 2+2) in Alveolar T cells with Adj.p-val <0.1. (No DMCs identified in HLA-DR)
		Supplementary Table S4. Common Differentially methylated Genes (DMGs) from analyses in Alveolar macrophages and Tcells for TB status. Using relaxed cutoffs MMD > 0.1 and Ajd.p-val < 0.05.a
		Supplementary Table S5. Differentially methylated CpG sites (DMCs) identified in Alveolar macrophages for IGRA status with MMD >0.1, Ajd.p-val < 0.05.
		Supplementary Table S6. Differentially methylated CpG sites (DMC) identified in Alveolar T cells for IGRA status with MMD >0.1, Ajd.p-val< 0.05.
		TB, tuberculosis; DMCs, differentially methylated CpG-sites; DMGs, differentially methylated genes; Con, control group; Exp, TB exposed; Pat, TB patients; MMD, mean methylation difference; IGRA, interferon-gamma release assay
		aThe Common DMGs in Alveolar macrophages and Alveolar T cells are shown where CpGs positions, adj.P val and MMD are from the Alveolar macrophage results only.

## Sheet: TableS1_HLA-DR_TB_DMC
Supplementary Table S1. Differentially methylated CpG sites (DMC) from analyses in Alveolar macrophages for TB status. Merged list of DMC from Pat, Exp and Con contrasts using absolute MMD > 0.2 and Ajd.p-val < 0.05.
chr	pos	Name	UCSC_RefGene_Name	MMD	adj.P.Val	comparison
chr12	132263618	cg18997918	SFRS8	-0.342941	0.00175681	(Pat+Exp)-Con
chr7	2758392	cg26075639		0.240296	0.00219007	(Pat+Exp)-Con
chr3	8041501	cg16361249		0.218062	0.00291767	(Pat+Exp)-Con
chr4	4246507	cg14389535	TMEM128	0.209617	0.00306199	(Pat+Exp)-Con
chr7	157260189	cg01350803		0.337824	0.00435871	(Pat+Exp)-Con
chr12	132263618	cg18997918	SFRS8	-0.404892	0.00483412	Exp-Con
chr7	151411526	cg17611936	PRKAG2	-0.23561	0.00647309	(Pat+Exp)-Con
chr6	30899233	cg07482223	SFTA2	-0.331937	0.00654478	(Pat+Exp)-Con
chr17	45933306	cg23643375	SP6	-0.262394	0.00696307	(Pat+Exp)-Con
chr5	176958396	cg01551388	FAM193B	-0.227602	0.00790837	(Pat+Exp)-Con
chr9	136149941	cg21160290	ABO	0.369046	0.00959893	Pat-Con
chr10	33654419	cg09821400		-0.207522	0.00959893	Pat-Con
chr7	155948572	cg07023501		-0.269477	0.00959893	Pat-Con
chr14	104625669	cg09856996	KIF26A	0.263169	0.00991898	(Pat+Exp)-Con
chr7	151411526	cg17611936	PRKAG2	-0.292912	0.0107241	Exp-Con
chr22	39852862	cg20806180	MGAT3	0.293635	0.0109951	Pat-Exp
chr11	61335600	cg02895447	SYT7	0.200485	0.0109951	Pat-Exp
chr7	1883390	cg16172923	MAD1L1	-0.265049	0.0109951	Pat-Exp
chr17	74075100	cg03882612	ZACN	0.21546	0.011789	Pat-Exp
chr7	155948572	cg07023501		-0.221993	0.011789	Pat-Exp
chr2	135214041	cg02741327	TMEM163	0.219161	0.0122739	(Pat+Exp)-Con
chr9	136150032	cg22535403	ABO	0.317043	0.0124914	Pat-Con
chr11	8931473	cg09997546	C11orf17	0.252779	0.0125748	Pat-Exp
chr3	133392210	cg00225618		-0.27681	0.0127914	Pat-Exp
chr8	80783997	cg06002687		-0.329009	0.0139092	Exp-Con
chr12	123757860	cg09084244	CDK2AP1	-0.284656	0.0141055	(Pat+Exp)-Con
chr10	126686762	cg09349613	CTBP2	-0.20548	0.0141976	(Pat+Exp)-Con
chr1	153590243	cg08477332	S100A14	0.273601	0.0149642	(Pat+Exp)-Con
chr3	8041501	cg16361249		0.252757	0.0150675	Exp-Con
chr18	6283067	cg14123034	L3MBTL4	-0.563249	0.0153617	Pat-Exp
chr12	49735181	cg12531498		0.247613	0.0157344	Pat-Exp
chr16	51130021	cg05415285		0.222377	0.0157344	Pat-Exp
chr7	16890431	cg16324992		-0.223026	0.0157344	Pat-Exp
chr4	186048269	cg10712884		-0.226175	0.0157344	Pat-Exp
chr5	31106255	cg12908908		0.29398	0.0158919	(Pat+Exp)-Con
chr7	16462463	cg16634737		-0.267389	0.0161446	(Pat+Exp)-Con
chr7	2758392	cg26075639		0.247574	0.0166845	Exp-Con
chr22	25571929	cg19707653	KIAA1671	-0.290328	0.0166845	Exp-Con
chr5	149546934	cg11503274	CDX1	0.244712	0.0168485	Pat-Exp
chr13	99084682	cg03040740	FARP1	-0.237899	0.0170282	(Pat+Exp)-Con
chr3	61237223	cg17573813	FHIT	-0.305084	0.0172947	(Pat+Exp)-Con
chr11	103453960	cg04998327		0.314634	0.0178714	(Pat+Exp)-Con
chr16	85531414	cg08717807		0.341501	0.0183067	(Pat+Exp)-Con
chr7	2050401	cg27286614	MAD1L1	-0.252809	0.0184163	(Pat+Exp)-Con
chr14	76819370	cg10744079		-0.273535	0.0187664	(Pat+Exp)-Con
chr1	61668835	cg25001190	NFIA	0.262293	0.018815	Pat-Con
chr3	133392210	cg00225618		-0.29114	0.0195809	Pat-Con
chr5	149546934	cg11503274	CDX1	0.269509	0.020658	Pat-Con
chr22	25571929	cg19707653	KIAA1671	-0.207324	0.0207047	(Pat+Exp)-Con
chr16	85531414	cg08717807		0.431676	0.0208073	Exp-Con
chr13	50414468	cg19544767		-0.210249	0.0209222	(Pat+Exp)-Con
chr5	3959743	cg08506672		-0.302535	0.0211746	(Pat+Exp)-Con
chr19	51524763	cg16698814	KLK10	0.210766	0.0212539	Pat-Exp
chr20	13830102	cg17971895	SEL1L2	-0.264551	0.0213727	(Pat+Exp)-Con
chr7	155623690	cg27481428		0.328855	0.0214871	(Pat+Exp)-Con
chr7	157260189	cg01350803		0.322421	0.0218581	Exp-Con
chr14	104625669	cg09856996	KIF26A	0.288038	0.0218581	Exp-Con
chr2	132233784	cg18757828	TUBA3D	-0.444295	0.022189	Pat-Exp
chr2	200775458	cg23649088	C2orf69	-0.234473	0.0227999	(Pat+Exp)-Con
chr7	140955751	cg25977769		-0.286066	0.022963	(Pat+Exp)-Con
chr15	28014040	cg15194100	OCA2	-0.20437	0.0230367	Pat-Exp
chr6	156954565	cg25099095		0.284	0.0236192	(Pat+Exp)-Con
chr7	140955751	cg25977769		-0.362186	0.0236739	Exp-Con
chr7	2289888	cg13748354	NUDT1	-0.321781	0.0237429	(Pat+Exp)-Con
chr7	55432402	cg11850943	LANCL2	0.221098	0.0247139	Pat-Con
chr4	186048269	cg10712884		-0.239197	0.0247139	Pat-Con
chr4	4246507	cg14389535	TMEM128	0.226395	0.024721	Exp-Con
chr12	31255279	cg00218628	DDX11	0.236386	0.0250654	(Pat+Exp)-Con
chr17	39151857	cg13183651	KRTAP3-3	0.291784	0.0251031	(Pat+Exp)-Con
chr19	12175107	cg12210543	ZNF844	0.201648	0.0251112	Pat-Con
chr16	88016632	cg00713204	BANP	0.35135	0.025687	Exp-Con
chr12	54089295	cg16917193		0.240917	0.0261605	Pat-Exp
chr7	158243632	cg23859303	PTPRN2	0.209659	0.0261605	Pat-Exp
chr17	42015961	cg24484352		-0.212199	0.0261605	Pat-Exp
chr7	155623690	cg27481428		0.385994	0.0264785	Exp-Con
chr4	7589937	cg10365769	SORCS2	-0.202622	0.0265009	Pat-Exp
chr14	76443578	cg21193926	TGFB3	0.223263	0.0269986	(Pat+Exp)-Con
chr17	45933306	cg23643375	SP6	-0.279431	0.0270334	Exp-Con
chr17	57120	cg05528899		-0.282018	0.0273808	(Pat+Exp)-Con
chr6	40145993	cg13604933		0.282108	0.028211	(Pat+Exp)-Con
chr9	45733081	cg10384133		-0.265578	0.0283796	Pat-Exp
chr10	133796476	cg21762589	BNIP3	0.208594	0.0286282	Pat-Con
chr17	74075100	cg03882612	ZACN	0.20577	0.0286282	Pat-Con
chr1	37944257	cg00859858	ZC3H12A	-0.229269	0.0286282	Pat-Con
chr6	170703742	cg04922606	FAM120B	0.33976	0.0288015	Exp-Con
chr10	133981681	cg03084184	JAKMIP3	0.265508	0.0288015	Exp-Con
chr15	90927939	cg12339131		-0.255454	0.0297185	Exp-Con
chr19	4667105	cg14976569	C19orf10	-0.200819	0.0298987	Pat-Con
chr1	163437170	cg23261375		-0.216208	0.0303446	Pat-Exp
chr8	29177713	cg18159666		0.231733	0.0304609	Pat-Exp
chr12	115133324	cg25033380		-0.205389	0.0304609	Pat-Exp
chr7	16890879	cg06955417		-0.224539	0.0304609	Pat-Exp
chr15	90927939	cg12339131		-0.204611	0.0312645	(Pat+Exp)-Con
chr12	123757860	cg09084244	CDK2AP1	-0.321618	0.0319065	Exp-Con
chr15	42677958	cg23386236	CAPN3	0.279332	0.0319494	(Pat+Exp)-Con
chr16	88016632	cg00713204	BANP	0.27811	0.0320554	(Pat+Exp)-Con
chr9	136149941	cg21160290	ABO	0.259899	0.0326014	Pat-Exp
chr11	12003759	cg13332953	DKK3	0.243868	0.0327657	(Pat+Exp)-Con
chr10	133961825	cg07629625	JAKMIP3	0.221026	0.0329643	Exp-Con
chr12	131506092	cg21046080	GPR133	-0.279864	0.0332037	(Pat+Exp)-Con
chr14	59947673	cg01543583	C14orf149	0.341582	0.0334358	Exp-Con
chr5	125762736	cg17670013	GRAMD3	-0.251725	0.0338018	(Pat+Exp)-Con
chr7	1883251	cg25814293	MAD1L1	-0.233178	0.0340863	Pat-Exp
chr1	61668835	cg25001190	NFIA	0.203489	0.0341991	Pat-Exp
chr15	22413307	cg04606582	OR4N3P	-0.204401	0.0343372	Exp-Con
chr2	241638367	cg15711973		0.217458	0.0344644	(Pat+Exp)-Con
chr5	150689593	cg08272429		-0.208909	0.0348136	(Pat+Exp)-Con
chr13	113664019	cg25533133	MCF2L	-0.203101	0.0349833	(Pat+Exp)-Con
chr10	71341259	cg12450708		-0.229187	0.0352732	Pat-Con
chr12	132973817	cg17576127		0.200411	0.0357084	Pat-Exp
chr1	22431609	cg10895682		-0.256695	0.0361488	Pat-Exp
chr19	58549906	cg01442953	ZSCAN1	0.211717	0.0363169	Pat-Exp
chr16	24857579	cg23280807	SLC5A11	-0.219632	0.0363169	Pat-Exp
chr1	181458839	cg17143291	CACNA1E	-0.353292	0.0363169	Pat-Exp
chr6	30899233	cg07482223	SFTA2	-0.335108	0.0365337	Exp-Con
chr1	248512094	cg10155537	OR14C36	-0.309665	0.0367492	Exp-Con
chr15	28054345	cg20976286	OCA2	-0.307085	0.0368713	Exp-Con
chr6	168196493	cg05733780	C6orf123	-0.208077	0.036937	Pat-Con
chr16	701656	cg26776784	WDR90	-0.211287	0.0374232	(Pat+Exp)-Con
chr7	1883420	cg16658412	MAD1L1	-0.287578	0.0379287	Pat-Exp
chr17	39151857	cg13183651	KRTAP3-3	0.34183	0.038525	Exp-Con
chr16	1133378	cg06710672		0.209917	0.0385482	Pat-Exp
chr10	131843597	cg09602803		-0.266138	0.0385482	Pat-Exp
chr11	132662772	cg24287362	OPCML	0.2128	0.0395896	Pat-Exp
chr12	49735181	cg12531498		0.235488	0.040211	Pat-Con
chr16	51130021	cg05415285		0.210886	0.040211	Pat-Con
chr11	130675346	cg19030317		-0.20315	0.040211	Pat-Con
chr10	38069519	cg04060909		-0.210773	0.040211	Pat-Con
chr4	7589937	cg10365769	SORCS2	-0.212392	0.040211	Pat-Con
chr3	97594786	cg20832559	CRYBG3	-0.214778	0.040211	Pat-Con
chr18	6283067	cg14123034	L3MBTL4	-0.528489	0.040211	Pat-Con
chr13	113688268	cg26512469	MCF2L	-0.271959	0.040613	(Pat+Exp)-Con
chr3	119243933	cg21139795	CD80	-0.290071	0.0406488	Pat-Exp
chr7	786861	cg17348244	HEATR2	0.297685	0.0412523	(Pat+Exp)-Con
chr8	1140574	cg02299007		0.293413	0.0415181	(Pat+Exp)-Con
chr12	55248207	cg16387046	MUCL1	0.217107	0.0423126	Pat-Con
chr19	51524763	cg16698814	KLK10	0.206729	0.0423126	Pat-Con
chr6	32808596	cg25693349	PSMB8	-0.227278	0.0423126	Pat-Con
chr4	186061165	cg02877261		0.246703	0.0424126	(Pat+Exp)-Con
chr11	103453960	cg04998327		0.332712	0.0425365	Exp-Con
chr17	76913036	cg08012219	TIMP2	-0.236811	0.0427307	Pat-Con
chr1	110230401	cg24506221	GSTM1	0.281003	0.0430786	Exp-Con
chr9	136150032	cg22535403	ABO	0.214047	0.0433889	Pat-Exp
chr11	111148753	cg27649396	C11orf53	0.227617	0.044469	(Pat+Exp)-Con
chr1	68084465	cg26804772		0.202375	0.0451499	Pat-Exp
chr2	135214041	cg02741327	TMEM163	0.243005	0.0453352	Exp-Con
chr7	150019955	cg24091438	LRRC61	0.205856	0.0454876	Pat-Con
chr9	45733081	cg10384133		-0.271288	0.0454876	Pat-Con
chr14	22361282	cg16702660		-0.272574	0.0456702	(Pat+Exp)-Con
chr1	159439981	cg11975397		-0.386579	0.0457439	Pat-Con
chr17	45786512	cg26981809	TBKBP1	0.206197	0.0458003	Pat-Exp
chr7	30635762	cg21429551	GARS	0.20352	0.0458003	Pat-Exp
chr7	16890973	cg09185587		-0.244769	0.0458003	Pat-Exp
chr2	181738271	cg01124477		-0.252168	0.0458246	Pat-Exp
chr11	102638706	cg00496961		-0.206204	0.0458315	Pat-Exp
chr14	68163792	cg05008296	RDH11	0.205934	0.0458323	Exp-Con
chr15	75019302	cg18092474	CYP1A1	0.217857	0.0472921	Pat-Exp
chr17	35149318	cg08535474		0.201512	0.0472921	Pat-Exp
chr20	23015091	cg01471923	SSTR4	-0.221454	0.0476671	Pat-Exp
chr5	176958396	cg01551388	FAM193B	-0.228143	0.0479888	Exp-Con
chr11	85873778	cg12568536		-0.347831	0.0479888	Exp-Con
chr6	170703742	cg04922606	FAM120B	0.246488	0.0480497	(Pat+Exp)-Con
chr11	121626930	cg01835922		0.218107	0.0487337	(Pat+Exp)-Con
chr1	55014160	cg01802772	ACOT11	0.447228	0.0487864	Pat-Exp
chr7	129856472	cg12134602	C7orf45	-0.468114	0.0487864	Pat-Exp
chr8	80783997	cg06002687		-0.207457	0.0489557	(Pat+Exp)-Con
chr5	140530222	cg23596123	PCDHB6	0.202039	0.0489857	Pat-Con
chr12	114395548	cg19191272	RBM19	-0.239625	0.0491575	Pat-Exp
chr4	37248861	cg26351451	KIAA1239	0.211927	0.0492814	Pat-Exp
chr5	1247290	cg15179011		0.236811	0.049335	Pat-Exp
chr2	63283939	cg07938743	OTX1	-0.204461	0.049335	Pat-Exp
chr10	22768167	cg19301501		-0.216686	0.049335	Pat-Exp
chr12	115102290	cg07211768		-0.216084	0.0494669	Pat-Exp

## Sheet: TableS2_CD3_TB_DMC
Supplementary Table S2. Differentially methylated CpG sites (DMC) from analyses in Alveolar T cells for TB status . Merged list of DMC from Pat, Exp and Con contrasts using absolute MMD > 0.2 and Ajd.p-val < 0.05.
chr	pos	Name	UCSC_RefGene_Name	MMD	adj.P.Val	comparison
chr17	79129078	cg13618516	AATK	-0.20315	0.00227296	(Pat+Exp)-Con
chr18	42255459	cg07258983		0.246936	0.00319256	(Pat+Exp)-Con
chr19	838964	cg09907228		-0.207196	0.00346897	(Pat+Exp)-Con
chr17	79129078	cg13618516	AATK	-0.2	0.00373138	Exp-Con
chr13	80755568	cg00750481		0.306653	0.00383502	(Pat+Exp)-Con
chr17	45933306	cg23643375	SP6	-0.30118	0.00400215	(Pat+Exp)-Con
chr8	131308633	cg20612299	ASAP1IT1	-0.204311	0.00403956	(Pat+Exp)-Con
chr1	109823096	cg22694271	PSRC1	-0.200638	0.00463979	(Pat+Exp)-Con
chr7	151411526	cg17611936	PRKAG2	-0.306225	0.00489289	Exp-Con
chr18	42255459	cg07258983		0.242772	0.00517628	Exp-Con
chr19	838964	cg09907228		-0.207489	0.00540085	Exp-Con
chr3	8041501	cg16361249		0.204489	0.00559998	(Pat+Exp)-Con
chr8	131308633	cg20612299	ASAP1IT1	-0.206613	0.00587779	Exp-Con
chr17	45933306	cg23643375	SP6	-0.287925	0.00591786	Exp-Con
chr13	80755568	cg00750481		0.30058	0.00615249	Exp-Con
chr16	29820119	cg02586198	MAZ	0.216563	0.00629191	(Pat+Exp)-Con
chr7	151411526	cg17611936	PRKAG2	-0.285779	0.00657001	(Pat+Exp)-Con
chr8	21769903	cg21163717	DOK2	0.210422	0.00693554	(Pat+Exp)-Con
chr2	48013473	cg04781916	MSH6	-0.219339	0.00740362	(Pat+Exp)-Con
chr8	21769903	cg21163717	DOK2	0.218851	0.00765654	Exp-Con
chr17	80581805	cg25197500	WDR45L	-0.200365	0.0079157	(Pat+Exp)-Con
chr1	2082315	cg26930596	PRKCZ	-0.207988	0.00796593	(Pat+Exp)-Con
chr7	140955751	cg25977769		-0.378877	0.00860729	(Pat+Exp)-Con
chr15	50570473	cg27123392	GABPB1	-0.200452	0.00861801	(Pat+Exp)-Con
chr11	325964	cg03071500		-0.272917	0.00951245	(Pat+Exp)-Con
chr16	29820119	cg02586198	MAZ	0.215042	0.0095228	Exp-Con
chr16	10909361	cg26434370	FAM18A	-0.202692	0.00992418	(Pat+Exp)-Con
chr2	48013473	cg04781916	MSH6	-0.20514	0.00996796	Exp-Con
chr19	33719749	cg22996768		0.357604	0.0102477	(Pat+Exp)-Con
chr12	7781004	cg16874583		0.274709	0.0102592	Exp-Con
chr12	7781004	cg16874583		0.26115	0.010976	(Pat+Exp)-Con
chr8	1952319	cg05888181	KBTBD11	-0.207887	0.0110491	(Pat+Exp)-Con
chr11	325964	cg03071500		-0.278961	0.0118017	Exp-Con
chr6	2888212	cg19577958	SERPINB9	-0.313485	0.0118272	(Pat+Exp)-Con
chr1	2082315	cg26930596	PRKCZ	-0.205558	0.0118371	Exp-Con
chr7	140955751	cg25977769		-0.381149	0.0118829	Exp-Con
chr16	10909361	cg26434370	FAM18A	-0.207405	0.0122185	Exp-Con
chr9	114706971	cg13633625		-0.203379	0.0126609	(Pat+Exp)-Con
chr11	325915	cg09597767		-0.208504	0.0127988	(Pat+Exp)-Con
chr8	1952319	cg05888181	KBTBD11	-0.210999	0.0143238	Exp-Con
chr17	66308577	cg13093111	ARSG	-0.318307	0.0145402	Pat-Con
chr17	821621	cg02459042	NXN	-0.236608	0.0148347	(Pat+Exp)-Con
chr19	33719749	cg22996768		0.349142	0.0154182	Exp-Con
chr8	1140574	cg02299007		0.457001	0.0154799	(Pat+Exp)-Con
chr1	3606550	cg21388339	TP73	-0.317402	0.0154799	(Pat+Exp)-Con
chr11	325915	cg09597767		-0.212391	0.016023	Exp-Con
chr8	142180109	cg09859659	DENND3	-0.223681	0.0163553	Exp-Con
chr17	821621	cg02459042	NXN	-0.244659	0.016382	Exp-Con
chr7	20010777	cg04456492		-0.366361	0.0165292	(Pat+Exp)-Con
chr5	176958396	cg01551388	FAM193B	-0.240733	0.0165438	(Pat+Exp)-Con
chr8	142180109	cg09859659	DENND3	-0.213646	0.0167058	(Pat+Exp)-Con
chr16	30721139	cg00084577	SNORA30	-0.201813	0.0168874	Exp-Con
chr6	30899233	cg07482223	SFTA2	-0.299783	0.0169635	(Pat+Exp)-Con
chr9	114706971	cg13633625		-0.204056	0.017315	Exp-Con
chr17	1508444	cg11076954	SLC43A2	-0.204011	0.0174682	Exp-Con
chr6	2888212	cg19577958	SERPINB9	-0.304783	0.0176881	Exp-Con
chr13	50414468	cg19544767		-0.231676	0.0178416	(Pat+Exp)-Con
chr13	50414468	cg19544767		-0.241399	0.0182133	Exp-Con
chr19	10332165	cg06655349	S1PR2	-0.207598	0.0183205	(Pat+Exp)-Con
chr8	80783997	cg06002687		-0.253188	0.0190238	(Pat+Exp)-Con
chr1	11902283	cg11726288	CLCN6	-0.202077	0.0191101	Exp-Con
chr5	6581849	cg23517115	LOC255167	0.213357	0.019274	(Pat+Exp)-Con
chr14	68798365	cg26298914	RAD51L1	-0.202468	0.0197887	(Pat+Exp)-Con
chr10	18434068	cg00177243	CACNB2	0.215704	0.0197963	Pat-Con
chr7	1142861	cg23496178	C7orf50	0.329088	0.0201561	Exp-Con
chr5	176958396	cg01551388	FAM193B	-0.24482	0.0205163	Exp-Con
chr1	246415176	cg08887025	SMYD3	0.239383	0.0209374	(Pat+Exp)-Con
chr8	1140574	cg02299007		0.426431	0.0213484	Exp-Con
chr6	31380198	cg11268327	MICA	-0.304513	0.0216498	(Pat+Exp)-Con
chr7	1142861	cg23496178	C7orf50	0.312815	0.0218166	(Pat+Exp)-Con
chr6	30899233	cg07482223	SFTA2	-0.302829	0.0219096	Exp-Con
chr2	37893255	cg05236720	CDC42EP3	-0.224373	0.022184	Pat-Con
chr12	64080144	cg00087746		0.232135	0.0224382	(Pat+Exp)-Con
chr19	10332165	cg06655349	S1PR2	-0.211198	0.0225516	Exp-Con
chr1	3606550	cg21388339	TP73	-0.309929	0.0226274	Exp-Con
chr5	6581849	cg23517115	LOC255167	0.218393	0.0227085	Exp-Con
chr12	7781288	cg25828445		0.282537	0.0229347	Exp-Con
chr3	11540082	cg12918464	ATG7	0.203387	0.0230025	(Pat+Exp)-Con
chr6	170703742	cg04922606	FAM120B	0.318227	0.0230523	(Pat+Exp)-Con
chr2	135214041	cg02741327	TMEM163	0.24502	0.0233431	(Pat+Exp)-Con
chr7	20010777	cg04456492		-0.359143	0.0239013	Exp-Con
chr1	246415176	cg08887025	SMYD3	0.245021	0.0244788	Exp-Con
chr2	219229146	cg13215060	C2orf62	0.238082	0.0249089	Exp-Con
chr8	600039	cg07234876		-0.641997	0.025315	Pat-Con
chr10	35504007	cg12196389		0.258326	0.0256908	(Pat+Exp)-Con
chr14	68798365	cg26298914	RAD51L1	-0.203504	0.0259259	Exp-Con
chr15	71747687	cg00125893	THSD4	0.211154	0.026747	(Pat+Exp)-Con
chr8	80783997	cg06002687		-0.242897	0.0277345	Exp-Con
chr1	235292369	cg16490124	SNORA14B	-0.369437	0.0282148	Exp-Con
chr12	64080144	cg00087746		0.234587	0.0282274	Exp-Con
chr13	111745598	cg26705599		0.366579	0.0283441	Exp-Con
chr12	7781093	cg10578777		0.318316	0.0283594	Exp-Con
chr3	11540082	cg12918464	ATG7	0.206185	0.0283971	Exp-Con
chr6	31380198	cg11268327	MICA	-0.305164	0.0284157	Exp-Con
chr4	189376729	cg27049827		0.234961	0.0288866	(Pat+Exp)-Con
chr12	7781288	cg25828445		0.264636	0.0289761	(Pat+Exp)-Con
chr16	88902276	cg08136432	GALNS	-0.348966	0.0293061	Exp-Con
chr10	35504007	cg12196389		0.264754	0.029387	Exp-Con
chr7	128354967	cg10157098	FAM71F1	-0.208281	0.0295053	(Pat+Exp)-Con
chr1	222162028	cg24586205		0.231872	0.0300916	(Pat+Exp)-Con
chr16	85531414	cg08717807		0.349638	0.0308308	(Pat+Exp)-Con
chr12	7781431	cg09651654		0.253534	0.0308715	Exp-Con
chr11	12003759	cg13332953	DKK3	0.285748	0.0309665	(Pat+Exp)-Con
chr11	1985287	cg06258939		-0.265544	0.031393	(Pat+Exp)-Con
chr11	12003759	cg13332953	DKK3	0.296734	0.0317879	Exp-Con
chr6	170703742	cg04922606	FAM120B	0.312501	0.0322844	Exp-Con
chr2	135214041	cg02741327	TMEM163	0.241506	0.0323	Exp-Con
chr8	133118481	cg05463326	HHLA1	0.265338	0.0330943	Exp-Con
chr10	116581112	cg00177239	FAM160B1	0.235561	0.0355347	Pat-Con
chr14	95649402	cg03542797	CLMN	-0.284353	0.0355347	Pat-Con
chr6	30980847	cg27292220		0.363851	0.0356514	Pat-Con
chr17	74260776	cg06245711	FAM100B	0.25823	0.0356514	Pat-Con
chr5	149568192	cg14778922	SLC6A7	0.234598	0.0356514	Pat-Con
chr8	143171182	cg11973316		0.209753	0.0356514	Pat-Con
chr5	95115604	cg21162938	RHOBTB3	-0.204349	0.0356514	Pat-Con
chr5	139562873	cg11953913	C5orf32	-0.235823	0.0356514	Pat-Con
chr6	111984370	cg14482998	FYN	-0.340746	0.0356514	Pat-Con
chr12	7781431	cg09651654		0.239409	0.035742	(Pat+Exp)-Con
chr3	178984973	cg00862290	KCNMB3	-0.212546	0.0362113	Pat-Con
chr8	600233	cg02524346		-0.399576	0.0362113	Pat-Con
chr14	69042922	cg06894612	RAD51L1	-0.207282	0.036529	Pat-Con
chr2	219229146	cg13215060	C2orf62	0.219795	0.0368704	(Pat+Exp)-Con
chr4	189376729	cg27049827		0.23494	0.0372987	Exp-Con
chr12	7781093	cg10578777		0.296279	0.0379732	(Pat+Exp)-Con
chr11	14495049	cg04467639	COPB1	0.289961	0.0383465	(Pat+Exp)-Con
chr2	121549866	cg17099569		0.200368	0.0387361	Pat-Con
chr12	7781169	cg14906510		0.215314	0.0389956	Exp-Con
chr8	599963	cg23958373		-0.512121	0.0390099	Pat-Con
chr18	713085	cg07100532	ENOSF1	0.344166	0.0390399	Pat-Con
chr2	208541770	cg03716125		0.206756	0.03917	Pat-Con
chr7	155623690	cg27481428		0.266363	0.0393273	(Pat+Exp)-Con
chr16	85531414	cg08717807		0.34957	0.0396339	Exp-Con
chr2	238533299	cg20513777		-0.207775	0.0396524	Pat-Con
chr2	70312615	cg19638749		0.256654	0.0397047	Pat-Con
chr8	133118481	cg05463326	HHLA1	0.24932	0.0399552	(Pat+Exp)-Con
chr6	31095800	cg01203766	PSORS1C1	0.209145	0.0402949	(Pat+Exp)-Con
chr1	222162028	cg24586205		0.228969	0.0406033	Exp-Con
chr6	31510729	cg03031988	BAT1	0.212972	0.0406695	Pat-Con
chr10	5454459	cg13661397	NET1	0.214457	0.0409924	Pat-Con
chr7	128354967	cg10157098	FAM71F1	-0.203017	0.0412057	Exp-Con
chr12	105143826	cg20883723	CHST11	-0.211744	0.0419983	Pat-Con
chr7	76829845	cg23708624	CCDC146	-0.215148	0.0423481	Pat-Con
chr16	56643342	cg06711418	MT2A	-0.239173	0.0430991	(Pat+Exp)-Con
chr12	123757860	cg09084244	CDK2AP1	-0.309511	0.0431126	(Pat+Exp)-Con
chr8	95962383	cg20039814	TP53INP1	0.22841	0.0432984	Pat-Con
chr16	88793811	cg14926485	FAM38A	-0.23736	0.0446515	Exp-Con
chr8	95962463	cg18059933	TP53INP1	0.228701	0.0446823	Pat-Con
chr10	50396833	cg00142482	C10orf128	-0.201404	0.0446823	Pat-Con
chr13	24824078	cg02659854	SPATA13	-0.20246	0.0446823	Pat-Con
chr1	246235275	cg11190354	SMYD3	-0.203874	0.0446823	Pat-Con
chr11	1985287	cg06258939		-0.252864	0.0446922	Exp-Con
chr7	44104860	cg07075347	PGAM2	0.285875	0.0450809	Pat-Con
chr6	47624117	cg06386482	GPR111	0.272753	0.0450809	Pat-Con
chr2	240727230	cg11946618		-0.423737	0.0450809	Pat-Con
chr20	62367888	cg00446123	LIME1	0.278674	0.0455725	Pat-Con
chr4	139840467	cg24019078		0.272974	0.0455725	Pat-Con
chr4	69817080	cg00149061	UGT2A3	-0.254432	0.0455725	Pat-Con
chr15	100893944	cg25508830		-0.245252	0.0458966	Pat-Con
chr6	54156824	cg16523850		0.263447	0.0466413	Pat-Con
chr1	1564422	cg00078456	MIB2	0.234713	0.0466413	Pat-Con
chr10	18549686	cg18959207	CACNB2	-0.212803	0.0466413	Pat-Con
chr6	106988121	cg02331198	AIM1	-0.251021	0.0466413	Pat-Con
chr6	33096312	cg08506353	HLA-DPB2	0.411091	0.0466466	Pat-Con
chr1	3052501	cg02368820	PRDM16	-0.282267	0.0469271	(Pat+Exp)-Con
chr10	43891547	cg04641860	HNRNPF	0.227934	0.0472886	Pat-Con
chr15	78933820	cg17179314	CHRNB4	0.348829	0.0474098	Pat-Con
chr5	912860	cg12705693	TRIP13	0.216175	0.0474098	Pat-Con
chr10	72476178	cg16352527	ADAMTS14	-0.203996	0.0474098	Pat-Con
chr12	7781169	cg14906510		0.201764	0.0476216	(Pat+Exp)-Con
chr2	70312492	cg16450677		0.266063	0.0480478	Pat-Con
chr5	142187317	cg01204911	ARHGAP26	-0.201892	0.0480478	Pat-Con
chr22	50841775	cg20366239	SAPS2	-0.209006	0.0482119	Pat-Con
chr14	69256888	cg08169020	ZFP36L1	0.306224	0.0484402	Pat-Con
chr3	49711033	cg01978534	APEH	0.2057	0.0484402	Pat-Con
chr1	235292369	cg16490124	SNORA14B	-0.335973	0.0484569	(Pat+Exp)-Con
chr12	126465510	cg13011003		-0.402085	0.0486926	Pat-Con
chr9	45733081	cg10384133		-0.270006	0.0488572	Pat-Con
chr16	88793811	cg14926485	FAM38A	-0.224999	0.0491265	(Pat+Exp)-Con
chr21	44985092	cg15536230	HSF2BP	-0.208129	0.0492379	Pat-Con
chr5	83017078	cg12199221	HAPLN1	0.238226	0.0493349	Pat-Con
chr17	42145043	cg16674514	LSM12	-0.232933	0.0493917	Pat-Con
chr4	189376704	cg16854281		0.300772	0.0496762	Exp-Con

## Sheet: TableS3_DMC_Pat_cd3_padj0.1
Supplementary Table S3. Differentially methylated CpG sites (DMC) identified between Linköping and Lima Patient samples (n= 2+2) in Alveolar T cells with padj<0.1. (No DMC identified in HLA-DR)
CpG	chr	pos	UCSC_RefGene_Name	MMD	Comparison
cg25569462	chr4	189026860	TRIML2	0.576818	Lima-Lin
cg18285337	chr1	11783294		0.695648	Lima-Lin
cg24730756	chr12	1612770	LOC100292680	-0.59159	Lima-Lin
cg18572898	chr6	32712103	HLA-DQA2	-0.70118	Lima-Lin
cg13573375	chr19	4033718	PIAS4	-0.658652	Lima-Lin
cg13387643	chr1	10737562	CASZ1	0.620644	Lima-Lin
cg24088508	chr1	38156462	C1orf109	0.75728	Lima-Lin
cg24018148	chr6	39290715	KCNK16	0.55743	Lima-Lin
cg04451031	chr4	10147302		0.533068	Lima-Lin
cg25977769	chr7	140955751		0.521392	Lima-Lin
cg11314779	chr15	72567956		-0.728674	Lima-Lin
cg07249765	chr7	4244643	SDK1	0.658476	Lima-Lin
cg01397495	chr2	136496804		-0.444136	Lima-Lin
cg03327352	chr1	46979222	DMBX1	0.589183	Lima-Lin
cg26964592	chr6	32904621	HLA-DMB	0.555975	Lima-Lin
cg01978703	chr17	973713	ABR	0.478985	Lima-Lin

## Sheet: TableS4_Common_DMGsList_0.1MMD
Supplementary Table S4. Common Differentially methylated Genes (DMGs) from analyses in Alveolar macrophages and Tcells for TB status. Using relaxed cutoffs MMD > 0.1 and Ajd.p-val < 0.05.
chr	pos	Name	UCSC_RefGene_Name	MMD	adj.P.Val	Comparisons
chr17	79093482	cg03809847	AATK	0.130874	0.0217621	Exp-Con
chr17	79093482	cg03809847	AATK	0.108834	0.0166043	(Pat+Exp)-Con
chr1	55014160	cg01802772	ACOT11	0.447228	0.0487864	Pat-Exp
chr16	89165300	cg02441474	ACSF3	-0.106596	0.00968648	(Pat+Exp)-Con
chr10	1767484	cg08442149	ADARB2	0.100828	0.0458003	Pat-Exp
chr10	1767482	cg16282361	ADARB2	0.13042	0.0459371	Pat-Exp
chr8	6420242	cg02548132	ANGPT2	0.113397	0.0384919	Pat-Exp
chr10	63723919	cg13344587	ARID5B	0.163869	0.0428178	Pat-Exp
chr2	239334832	cg08773314	ASB1	0.158512	0.0362964	Pat-Exp
chr8	62612575	cg07538204	ASPH	-0.109004	0.019238	(Pat+Exp)-Con
chr3	11540082	cg12918464	ATG7	0.194098	0.0361509	Exp-Con
chr3	11540082	cg12918464	ATG7	0.170352	0.0135339	(Pat+Exp)-Con
chr11	289927	cg10261205	ATHL1	-0.113538	0.0447117	(Pat+Exp)-Con
chr11	289966	cg10411146	ATHL1	-0.108087	0.0482459	(Pat+Exp)-Con
chr15	26035581	cg15338782	ATP10A	-0.105955	0.0267288	Exp-Con
chr15	26035581	cg15338782	ATP10A	-0.114222	0.00304174	(Pat+Exp)-Con
chr13	113493939	cg01404750	ATP11A	-0.117228	0.0392891	Exp-Con
chr16	88016632	cg00713204	BANP	0.35135	0.025687	Exp-Con
chr16	88016632	cg00713204	BANP	0.27811	0.0320554	(Pat+Exp)-Con
chr1	94057789	cg08237401	BCAR3	-0.191114	0.0476671	Pat-Exp
chr6	32365553	cg19117063	BTNL2	-0.113169	0.0426541	Exp-Con
chr10	104535990	cg14939082	C10orf26	-0.101667	0.0298662	Exp-Con
chr10	104535990	cg14939082	C10orf26	-0.110296	0.00725557	(Pat+Exp)-Con
chr10	134755601	cg01757745	C10orf93	0.132708	0.0279279	Pat-Exp
chr10	134756994	cg17000480	C10orf93	0.144834	0.0465761	Pat-Exp
chr12	6810427	cg16280700	C12orf53	0.129783	0.0247139	Pat-Con
chr12	6810427	cg16280700	C12orf53	0.111995	0.0261605	Pat-Exp
chr3	194979565	cg05486924	C3orf21	-0.135003	0.0335727	(Pat+Exp)-Con
chr1	57432150	cg26851374	C8B	0.116991	0.0367587	(Pat+Exp)-Con
chr9	138800324	cg00022024	CAMSAP1	0.137306	0.0460163	Pat-Exp
chr15	42677958	cg23386236	CAPN3	0.279332	0.0319494	(Pat+Exp)-Con
chr16	8960972	cg07692489	CARHSP1	0.103465	0.0334368	Exp-Con
chr16	8960833	cg02349264	CARHSP1	0.104855	0.0144134	(Pat+Exp)-Con
chr16	8960972	cg07692489	CARHSP1	0.10041	0.0310862	(Pat+Exp)-Con
chr6	31123569	cg12999291	CCHCR1	0.134719	0.0261181	Exp-Con
chr6	31123569	cg12999291	CCHCR1	0.110102	0.0195736	(Pat+Exp)-Con
chr19	35837636	cg22514682	CD22	-0.119454	0.0302555	Exp-Con
chr3	119243933	cg21139795	CD80	-0.290071	0.0406488	Pat-Exp
chr20	23062796	cg19010566	CD93	-0.13305	0.0483065	Pat-Exp
chr16	68772469	cg09406989	CDH1	-0.12706	0.015283	Exp-Con
chr12	123757860	cg09084244	CDK2AP1	-0.321618	0.0319065	Exp-Con
chr12	123757860	cg09084244	CDK2AP1	-0.284656	0.0141055	(Pat+Exp)-Con
chr12	105089508	cg07696842	CHST11	-0.124908	0.0247332	(Pat+Exp)-Con
chr4	141317067	cg22901919	CLGN	0.151722	0.0421699	(Pat+Exp)-Con
chr1	9847879	cg07589991	CLSTN1	-0.176082	0.0468664	Pat-Con
chr1	9847879	cg07589991	CLSTN1	-0.174986	0.0275733	Pat-Exp
chr21	46851112	cg12668523	COL18A1	-0.132802	0.0238006	Exp-Con
chr21	46851112	cg12668523	COL18A1	-0.132027	0.00625783	(Pat+Exp)-Con
chr3	130171066	cg17919763	COL29A1	0.173822	0.01665	Exp-Con
chr3	130171066	cg17919763	COL29A1	0.135047	0.0084322	(Pat+Exp)-Con
chr8	142183642	cg16499923	DENND3	-0.10026	0.0460069	(Pat+Exp)-Con
chr12	56325015	cg20051772	DGKA	0.100497	0.0361227	Pat-Exp
chr10	531152	cg26116937	DIP2C	-0.130589	0.0250887	Exp-Con
chr10	530805	cg00590260	DIP2C	-0.110511	0.0307215	Exp-Con
chr10	531098	cg09955645	DIP2C	-0.11385	0.0399201	Exp-Con
chr10	530951	cg00219169	DIP2C	-0.128926	0.0476655	Exp-Con
chr10	530635	cg23978242	DIP2C	0.126115	0.0392415	Pat-Exp
chr10	531465	cg06439603	DIP2C	0.105214	0.0458003	Pat-Exp
chr10	670787	cg06571559	DIP2C	0.134369	0.047856	Pat-Exp
chr10	670815	cg11468148	DIP2C	0.190315	0.0491575	Pat-Exp
chr10	531152	cg26116937	DIP2C	-0.108869	0.0343425	(Pat+Exp)-Con
chr11	12003759	cg13332953	DKK3	0.243868	0.0327657	(Pat+Exp)-Con
chr11	58965571	cg21089930	DTX4	-0.102986	0.0226944	(Pat+Exp)-Con
chr12	77417738	cg07679219	E2F7	-0.184737	0.0222211	Exp-Con
chr12	77417738	cg07679219	E2F7	-0.18436	0.00395647	(Pat+Exp)-Con
chr12	77417567	cg22480875	E2F7	-0.156628	0.00911571	(Pat+Exp)-Con
chr1	21656047	cg19273683	ECE1	-0.136824	0.0184889	Exp-Con
chr1	231512676	cg18815120	EGLN1	-0.115337	0.0453508	(Pat+Exp)-Con
chr7	37026842	cg24237862	ELMO1	0.104996	0.0444652	Pat-Exp
chr1	17047525	cg17984400	ESPNP	0.108092	0.0330097	(Pat+Exp)-Con
chr11	128420863	cg14718848	ETS1	-0.128986	0.0328797	(Pat+Exp)-Con
chr6	170703742	cg04922606	FAM120B	0.33976	0.0288015	Exp-Con
chr6	170703742	cg04922606	FAM120B	0.246488	0.0480497	(Pat+Exp)-Con
chr10	116581248	cg07216976	FAM160B1	0.145162	0.0285187	Pat-Exp
chr5	176958396	cg01551388	FAM193B	-0.228143	0.0479888	Exp-Con
chr5	176958396	cg01551388	FAM193B	-0.227602	0.00790837	(Pat+Exp)-Con
chr17	643676	cg17369991	FAM57A	-0.125832	0.0419076	Pat-Exp
chr7	128354965	cg12560447	FAM71F1	-0.151606	0.0368799	(Pat+Exp)-Con
chr7	128354967	cg10157098	FAM71F1	-0.159977	0.048697	(Pat+Exp)-Con
chr12	133067700	cg24780570	FBRSL1	0.122163	0.0479179	Pat-Con
chr12	133067700	cg24780570	FBRSL1	0.120038	0.0303446	Pat-Exp
chr12	133125057	cg14240634	FBRSL1	-0.165804	0.0154672	(Pat+Exp)-Con
chr5	147773164	cg11445764	FBXO38	-0.11258	0.0283946	Exp-Con
chr5	147777756	cg23296792	FBXO38	-0.10068	0.0327657	(Pat+Exp)-Con
chr3	61237223	cg17573813	FHIT	-0.305084	0.0172947	(Pat+Exp)-Con
chr3	71355161	cg20506347	FOXP1	-0.118388	0.044419	(Pat+Exp)-Con
chr1	230415225	cg24591105	GALNT2	-0.121123	0.013479	Pat-Con
chr7	30635712	cg13917964	GARS	0.118074	0.0458003	Pat-Exp
chr7	30635762	cg21429551	GARS	0.20352	0.0458003	Pat-Exp
chr7	30635838	cg03068497	GARS	0.196231	0.0464658	Pat-Exp
chr1	153777721	cg07567724	GATAD2B	-0.156596	0.0487849	Pat-Exp
chr6	42927959	cg24815792	GNMT	0.105004	0.0427307	Pat-Con
chr12	131506092	cg21046080	GPR133	-0.279864	0.0332037	(Pat+Exp)-Con
chr17	37896074	cg25038082	GRB7	0.111063	0.047856	Pat-Exp
chr1	24646392	cg02984188	GRHL3	0.142931	0.0382399	Pat-Exp
chr5	176855304	cg23327334	GRK6	-0.120657	0.0378905	(Pat+Exp)-Con
chr5	134714262	cg12516954	H2AFY	-0.118875	0.0173071	(Pat+Exp)-Con
chr6	31021275	cg21655448	HCG22	-0.138154	0.0397794	Exp-Con
chr6	31021275	cg21655448	HCG22	-0.143864	0.0041378	(Pat+Exp)-Con
chr6	32629920	cg10989981	HLA-DQB1	0.127878	0.0185408	Exp-Con
chr11	2181072	cg22068589	INS-IGF2	0.136504	0.0494392	(Pat+Exp)-Con
chr7	2646955	cg18338984	IQCE	-0.103668	0.00934053	(Pat+Exp)-Con
chr3	13039396	cg18092630	IQSEC1	-0.112936	0.00959893	Pat-Con
chr12	248889	cg10356759	IQSEC3	-0.106168	0.0437814	Exp-Con
chr12	248889	cg10356759	IQSEC3	-0.109277	0.00670832	(Pat+Exp)-Con
chr6	73330112	cg05350268	KCNQ5	-0.12813	0.0491575	Pat-Exp
chr4	38673130	cg05205842	KLF3	0.148275	0.0491575	Pat-Exp
chr15	58844500	cg05337681	LIPC	-0.113558	0.00610892	(Pat+Exp)-Con
chr5	6583103	cg03416085	LOC255167	0.116358	0.0385328	Pat-Exp
chr13	47126328	cg11342437	LRCH1	0.134197	0.0460574	Pat-Con
chr13	47126445	cg19038230	LRCH1	0.139214	0.0304609	Pat-Exp
chr13	47126328	cg11342437	LRCH1	0.123463	0.0365249	Pat-Exp
chr13	47126300	cg01205267	LRCH1	0.171637	0.047856	Pat-Exp
chr13	47126551	cg19833103	LRCH1	0.124914	0.0487864	Pat-Exp
chr7	150019955	cg24091438	LRRC61	0.205856	0.0454876	Pat-Con
chr2	238641962	cg04862290	LRRFIP1	-0.177051	0.0498772	Exp-Con
chr11	1901748	cg04948649	LSP1	-0.106943	0.0237429	(Pat+Exp)-Con
chr1	236017128	cg03678274	LYST	-0.113595	0.0226971	(Pat+Exp)-Con
chr7	1883390	cg16172923	MAD1L1	-0.265049	0.0109951	Pat-Exp
chr7	1883251	cg25814293	MAD1L1	-0.233178	0.0340863	Pat-Exp
chr7	1883420	cg16658412	MAD1L1	-0.287578	0.0379287	Pat-Exp
chr7	2050401	cg27286614	MAD1L1	-0.252809	0.0184163	(Pat+Exp)-Con
chr7	2019874	cg15574437	MAD1L1	-0.188724	0.0267191	(Pat+Exp)-Con
chr15	91460071	cg20507228	MAN2A2	-0.120302	0.0296532	(Pat+Exp)-Con
chr2	27194436	cg17192247	MAPRE3	0.121357	0.0382399	Pat-Exp
chr5	66347164	cg19458529	MAST4	0.119522	0.0464658	Pat-Exp
chr18	74799495	cg13572782	MBP	-0.12943	0.0405597	Exp-Con
chr18	74799495	cg13572782	MBP	-0.111422	0.0329695	(Pat+Exp)-Con
chr8	8727303	cg04025970	MFHAS1	0.110519	0.040097	Exp-Con
chr8	8729819	cg11784887	MFHAS1	-0.10706	0.00291072	(Pat+Exp)-Con
chr8	8727303	cg04025970	MFHAS1	0.101853	0.0188519	(Pat+Exp)-Con
chr2	135041380	cg18482303	MGAT5	-0.102951	0.00861112	(Pat+Exp)-Con
chr11	65210645	cg05363534	MIR612	-0.111147	0.015159	(Pat+Exp)-Con
chr19	54368806	cg19239930	MYADM	0.13314	0.0399664	Pat-Con
chr19	54368806	cg19239930	MYADM	0.108292	0.0463309	Pat-Exp
chr7	98872169	cg12492380	MYH16	0.158128	0.0492814	Pat-Exp
chr19	17246356	cg24679890	MYO9B	-0.102738	0.0217098	(Pat+Exp)-Con
chr10	76747956	cg24520885	MYST4	-0.153469	0.0158766	Pat-Con
chr20	23398291	cg24165121	NAPB	-0.104093	0.0388442	(Pat+Exp)-Con
chr19	3192704	cg12086975	NCLN	-0.101784	0.0306306	Exp-Con
chr1	160336712	cg00881010	NHLH1	0.121675	0.022189	Pat-Exp
chr6	32165917	cg11671335	NOTCH4	0.115112	0.0241457	Pat-Exp
chr14	24867472	cg11152302	NYNRIN	-0.105269	0.0477804	(Pat+Exp)-Con
chr15	22413307	cg04606582	OR4N3P	-0.204401	0.0343372	Exp-Con
chr15	22413307	cg04606582	OR4N3P	-0.197333	0.0469033	(Pat+Exp)-Con
chr1	149915753	cg07318158	OTUD7B	0.176902	0.0194908	Exp-Con
chr1	149915753	cg07318158	OTUD7B	0.179794	0.0022819	(Pat+Exp)-Con
chr5	140530222	cg23596123	PCDHB6	0.202039	0.0489857	Pat-Con
chr1	9775755	cg23098018	PIK3CD	-0.129504	0.0399664	Pat-Con
chr1	9748107	cg11980800	PIK3CD	0.156895	0.0402999	Pat-Exp
chr1	9775755	cg23098018	PIK3CD	-0.108053	0.0428178	Pat-Exp
chr8	145047469	cg00575153	PLEC1	-0.100908	0.0383239	Exp-Con
chr1	208394231	cg05626664	PLXNA2	0.106279	0.0255923	(Pat+Exp)-Con
chr3	129312902	cg08471739	PLXND1	-0.186604	0.0170499	Pat-Exp
chr1	3162159	cg19704073	PRDM16	0.140263	0.0461137	Pat-Exp
chr7	151411526	cg17611936	PRKAG2	-0.292912	0.0107241	Exp-Con
chr7	151411526	cg17611936	PRKAG2	-0.23561	0.00647309	(Pat+Exp)-Con
chr19	695568	cg06599390	PRSSL1	-0.135965	0.0458246	Pat-Exp
chr6	32808596	cg25693349	PSMB8	-0.227278	0.0423126	Pat-Con
chr7	158263221	cg04007350	PTPRN2	0.117309	0.0353193	Exp-Con
chr7	157691177	cg09377301	PTPRN2	-0.149552	0.0217872	Pat-Exp
chr7	158243632	cg23859303	PTPRN2	0.209659	0.0261605	Pat-Exp
chr7	157588520	cg16960396	PTPRN2	0.105501	0.0480765	Pat-Exp
chr7	158032496	cg23066280	PTPRN2	0.115847	0.0358601	(Pat+Exp)-Con
chr9	134536436	cg14310198	RAPGEF1	-0.12671	0.0112555	(Pat+Exp)-Con
chr13	114828264	cg06380691	RASA3	-0.107416	0.0186411	(Pat+Exp)-Con
chr12	114395548	cg19191272	RBM19	-0.239625	0.0491575	Pat-Exp
chr8	21996546	cg09539908	REEP4	0.103437	0.0258404	Exp-Con
chr4	3371566	cg17569842	RGS12	0.159052	0.0283796	Pat-Exp
chr4	3371291	cg20495365	RGS12	0.142991	0.0325083	Pat-Exp
chr1	51703649	cg03102824	RNF11	0.15706	0.0428178	Pat-Exp
chr17	8301166	cg03163302	RNF222	-0.111646	0.0401105	Exp-Con
chr2	55239331	cg12813441	RTN4	0.182127	0.0491575	Pat-Exp
chr6	30899233	cg07482223	SFTA2	-0.335108	0.0365337	Exp-Con
chr6	30899233	cg07482223	SFTA2	-0.331937	0.00654478	(Pat+Exp)-Con
chr20	42194607	cg13877999	SGK2	0.157665	0.0198525	(Pat+Exp)-Con
chr7	101936318	cg12315284	SH2B2	0.100442	0.00648461	(Pat+Exp)-Con
chr3	15345841	cg27104695	SH3BP5	-0.110696	0.0284175	Exp-Con
chr4	8229159	cg04605681	SH3TC1	-0.12178	0.0487864	Pat-Exp
chr4	8207058	cg10842314	SH3TC1	-0.144275	0.0446866	(Pat+Exp)-Con
chr1	154943349	cg22018051	SHC1	-0.105012	0.021021	(Pat+Exp)-Con
chr19	51670251	cg02018326	SIGLECP3	0.103547	0.0374232	(Pat+Exp)-Con
chr4	7589937	cg10365769	SORCS2	-0.212392	0.040211	Pat-Con
chr4	7589937	cg10365769	SORCS2	-0.202622	0.0265009	Pat-Exp
chr4	7289497	cg14383572	SORCS2	-0.161139	0.0325083	Pat-Exp
chr17	45933306	cg23643375	SP6	-0.279431	0.0270334	Exp-Con
chr17	45924227	cg23391107	SP6	0.146914	0.0428178	Pat-Exp
chr17	45933306	cg23643375	SP6	-0.262394	0.00696307	(Pat+Exp)-Con
chr2	220325375	cg07974504	SPEG	0.144224	0.0397794	Exp-Con
chr1	54821853	cg09890699	SSBP3	-0.12437	0.0487864	Pat-Exp
chr1	54822503	cg08641990	SSBP3	-0.100909	0.0146218	(Pat+Exp)-Con
chr8	134552558	cg18980148	ST3GAL1	-0.105543	0.0279646	Exp-Con
chr8	134552558	cg18980148	ST3GAL1	-0.106569	0.0069971	(Pat+Exp)-Con
chr5	32584912	cg18721397	SUB1	0.123447	0.0286294	Exp-Con
chr5	32584912	cg18721397	SUB1	0.139412	0.0025029	(Pat+Exp)-Con
chr10	29923736	cg00049475	SVIL	0.186415	0.0458003	Pat-Exp
chr6	158464296	cg00407393	SYNJ2	0.160705	0.0463309	Pat-Exp
chr6	158481402	cg06633162	SYNJ2	0.145819	0.0487849	Pat-Exp
chr17	80708632	cg02398342	TBCD	0.181229	0.0181363	(Pat+Exp)-Con
chr17	80708513	cg00809820	TBCD	0.122444	0.0421099	(Pat+Exp)-Con
chr17	76913036	cg08012219	TIMP2	-0.236811	0.0427307	Pat-Con
chr17	76876239	cg00863893	TIMP2	-0.108628	0.043736	(Pat+Exp)-Con
chr3	149095743	cg16810293	TM4SF1	-0.108987	0.0355661	(Pat+Exp)-Con
chr17	7339721	cg14782678	TMEM102	0.176072	0.0371652	Pat-Con
chr17	7339721	cg14782678	TMEM102	0.141486	0.0464658	Pat-Exp
chr2	135214041	cg02741327	TMEM163	0.243005	0.0453352	Exp-Con
chr2	135214041	cg02741327	TMEM163	0.219161	0.0122739	(Pat+Exp)-Con
chr1	3644226	cg04392488	TP73	-0.120759	0.0361488	Pat-Exp
chr6	41254997	cg18505453	TREM1	0.128634	0.0236651	Exp-Con
chr6	30122432	cg15979214	TRIM10	0.141251	0.0179468	(Pat+Exp)-Con
chr1	19496406	cg08530036	UBR4	-0.143254	0.0385482	Pat-Exp
chr3	11632974	cg00691123	VGLL4	0.16142	0.0472921	Pat-Exp
chr1	150117110	cg11586034	VPS45	-0.106032	0.0327355	(Pat+Exp)-Con
chr2	98702260	cg09741917	VWA3B	0.146637	0.04752	Pat-Exp
chr4	10119810	cg27206867	WDR1	-0.125098	0.0265538	Exp-Con
chr16	701656	cg26776784	WDR90	-0.211287	0.0374232	(Pat+Exp)-Con
Note: the Common DMGs in Alveolar macrophages and Alveolar T cells are shown where CpGs positions, adj.P val and MMD are from the Alveolar macrophage results only.

## Sheet: TableS5_HLA_IGRA.B_DMC
Supplementary Table S5. Differentially methylated CpG sites (DMC) identified in Alveolar macrophages for IGRA status with MMD>0.1, FDR< 0.05.
chr	pos	Name	UCSC_RefGene_Name	MMD	adj.P.Val
chr2	55203963	cg09592903	RTN4	-0.108042	0.00105828
chr12	132824225	cg17044526	GALNT9	-0.192643	0.00144514
chr3	112278508	cg01081718	ATG3	-0.131711	0.00175702
chr8	96085994	cg27130359		0.105043	0.00213503
chr19	4667105	cg14976569	C19orf10	-0.139331	0.00213503
chr14	105176581	cg21827986	INF2	-0.1501	0.00213503
chr10	121769080	cg16047584		-0.151023	0.00213503
chr17	27889826	cg03739177	ABHD15	-0.15114	0.00213503
chr3	172067735	cg01948066	FNDC3B	-0.122929	0.00228485
chr11	55418816	cg04317927	OR4S2	-0.170093	0.00228485
chr2	23371714	cg01659038		-0.11315	0.00239291
chr3	54158728	cg05523017	CACNA2D3	-0.121998	0.00239291
chr2	181738271	cg01124477		-0.204402	0.00242856
chr12	109825145	cg00020778	MYO1H	-0.113744	0.00253123
chr4	6675309	cg04672903	LOC93622	-0.126486	0.00258991
chr17	1040653	cg05280794	ABR	-0.307838	0.0026065
chr3	28616404	cg00380860		0.1008	0.00261571
chr14	104842040	cg10969997		-0.118084	0.00293956
chr8	142192487	cg17527975	DENND3	-0.138319	0.00321702
chr14	99707721	cg23580725	BCL11B	-0.142465	0.00327334
chr13	112669546	cg25918510		-0.128549	0.00329145
chr12	95226993	cg08922308	MIR492	0.244161	0.00347404
chr11	18956196	cg15902329	MRGPRX1	0.193547	0.0037403
chr11	81131171	cg08783317		-0.109061	0.0037403
chr4	10686300	cg03485217	CLNK	-0.114858	0.0037403
chr1	40024971	cg10243676	LOC728448	-0.116845	0.0037403
chr18	72102996	cg15129815	FAM69C	-0.320974	0.0038289
chr1	167716385	cg22045055	MPZL1	-0.141552	0.00399405
chr3	190971216	cg02226079		-0.144713	0.00406473
chr3	133392210	cg00225618		-0.167413	0.00406473
chr12	52799285	cg02418195	KRT82	-0.169627	0.00406473
chr21	15434350	cg02188142		-0.180209	0.00406473
chr4	32135861	cg04714926		-0.109805	0.00407511
chr19	48060523	cg12242547	ZNF541	-0.112406	0.00412741
chr1	3129633	cg05265611	PRDM16	-0.118562	0.00412741
chr15	24411878	cg15564871	PWRN2	-0.134249	0.00412741
chr7	155948572	cg07023501		-0.141491	0.00412741
chr12	96586924	cg15068593	ELK3	-0.217074	0.00412741
chr20	44641161	cg23303369	MMP9	-0.110929	0.00414453
chr12	46320944	cg05346476	SFRS2IP	-0.11917	0.00425112
chr10	46912902	cg16311364	FAM35B	-0.160336	0.00430712
chr12	126348693	cg20988573		-0.127488	0.00437414
chr3	190363742	cg21798630	IL1RAP	-0.187661	0.00450605
chr4	1554593	cg22865455		-0.102772	0.00470688
chr6	29520752	cg11935738		0.165876	0.00481655
chr1	153747600	cg19773045	SLC27A3	0.112752	0.00481655
chr21	43098958	cg12792526	NCRNA00111	0.104253	0.00481655
chr19	10136161	cg22949616		-0.115547	0.00481655
chr4	41878119	cg18779296		-0.136094	0.00481655
chr19	56615103	cg10705717	ZNF787	-0.141764	0.00481655
chr3	97594786	cg20832559	CRYBG3	-0.14473	0.00481655
chr13	53625240	cg16520357	OLFM4	-0.153951	0.00481655
chr16	87398040	cg00512563	FBXO31	-0.13678	0.00498777
chr5	8621221	cg01912692		-0.137049	0.00498777
chr10	21436607	cg26571478	C10orf113	-0.11646	0.00512694
chr12	132880128	cg00502222	GALNT9	-0.122289	0.00513869
chr2	210444201	cg10861541	MAP2	-0.125738	0.00521054
chr14	100171164	cg18364769	CYP46A1	-0.106386	0.00527385
chr11	79124571	cg08794954	ODZ4	-0.127575	0.00540131
chr6	160860356	cg04794858	SLC22A3	-0.107744	0.00542401
chr9	45733081	cg10384133		-0.203027	0.00545566
chr1	36840028	cg25722983	STK40	0.101717	0.00554852
chr12	49735181	cg12531498		0.163726	0.00557343
chr15	50792856	cg22422264	USP50	-0.163268	0.00557343
chr14	76594783	cg13491731		-0.109911	0.00561258
chr14	88791864	cg12866656	KCNK10	-0.125433	0.00561258
chr11	102638778	cg08804111		-0.181642	0.00564534
chr19	46650284	cg01571956	IGFL2	-0.117173	0.00571154
chr11	102959223	cg07180674	DCUN1D5	-0.147383	0.00571154
chr11	13509032	cg11976911		-0.135857	0.00574644
chr3	72235389	cg10598503		-0.118198	0.00574759
chr6	163570521	cg11194708	PACRG	-0.10591	0.00576743
chr5	72729890	cg05213379		-0.145876	0.00576743
chr3	159364474	cg01364862	SCHIP1	-0.109004	0.00582048
chr2	241460002	cg03743720	ANKMY1	0.111509	0.00584357
chr11	66311334	cg05516272	ZDHHC24	-0.111231	0.0058543
chr12	106551225	cg19390995		-0.10408	0.00587654
chr17	31708147	cg14655552	ACCN1	-0.187324	0.00589265
chr17	79877389	cg09253473	MAFG	-0.11688	0.00596205
chr5	8457818	cg18394854		-0.11689	0.00602088
chr4	183621609	cg21618036	ODZ3	-0.105529	0.00603266
chr17	44076415	cg14431592	STH	-0.102814	0.00606068
chr6	63572411	cg13007763		-0.110802	0.00607024
chr1	204435434	cg26064794	PIK3C2B	-0.17271	0.00609878
chr1	11345187	cg08936461	UBIAD1	-0.118417	0.00612547
chr16	66978911	cg03647619	CES2	-0.103934	0.00619616
chr5	23507644	cg22079902	PRDM9	-0.11765	0.00622108
chr10	102100212	cg00653847		0.119456	0.00634785
chr7	144437395	cg01832012	TPK1	-0.106851	0.00634785
chr5	8457970	cg24581226		-0.128433	0.00644959
chr6	28969099	cg24104616	ZNF311	-0.183466	0.00650997
chr5	8457729	cg07327178		-0.103894	0.00661048
chr6	31629900	cg26969933	C6orf47	-0.123012	0.00681467
chr10	105428506	cg18735015	SH3PXD2A	-0.131408	0.00682322
chr3	55496823	cg24601850		-0.136817	0.00703994
chr15	96303955	cg25985504		-0.102352	0.00713797
chr21	15588038	cg02364942	RBM11	-0.125651	0.00717258
chr5	146253830	cg10926851	PPP2R2B	-0.234288	0.00717532
chr1	569427	cg08858441		0.137655	0.00723377
chr16	8960833	cg02349264	CARHSP1	0.142203	0.00726576
chr16	57673258	cg09109520	GPR56	0.1188	0.00727095
chr3	46768322	cg26262900		-0.10363	0.00743417
chr10	85974086	cg12353636	PCDH21	-0.126579	0.00749642
chr14	66980127	cg05237374	GPHN	-0.128756	0.0076336
chr10	38069519	cg04060909		-0.142579	0.00769582
chr2	239334832	cg08773314	ASB1	0.113084	0.00774187
chr14	96752271	cg23900681	ATG2B	-0.117704	0.00775604
chr2	42950061	cg21595092		0.114871	0.00784617
chr1	42224680	cg11857452	HIVEP3	-0.120401	0.00795348
chr2	157184614	cg27074041	NR4A2	-0.114955	0.00801851
chr1	228154769	cg05598488		-0.212604	0.00801851
chr1	150947896	cg18611122	LASS2	0.101299	0.00810463
chr5	140579470	cg05852276	PCDHB11	0.111139	0.00814628
chr7	27142682	cg09871315	HOXA2	-0.102823	0.00821469
chr20	36039916	cg15054990		-0.11145	0.00821469
chr10	1411072	cg20648369	ADARB2	0.126713	0.00829086
chr5	149546934	cg11503274	CDX1	0.155455	0.00831474
chr3	138725153	cg02806645	PRR23A	-0.191097	0.00831474
chr19	11314087	cg11595059	DOCK6	-0.102637	0.00840813
chr1	42248998	cg17220055	HIVEP3	-0.231152	0.00850553
chr16	66458043	cg06520095		-0.321306	0.00850553
chr8	1824904	cg08980014	ARHGEF10	-0.111905	0.00858751
chr5	126111738	cg06405317	LMNB1	0.122444	0.00859066
chr10	125428324	cg04301263	GPR26	-0.107734	0.00867387
chr12	92543184	cg02587993		-0.10873	0.00868466
chr4	1063827	cg24218681		-0.109692	0.00874008
chr12	2761091	cg25557995	CACNA1C	-0.10969	0.00877328
chr6	45422120	cg22328837	RUNX2	-0.139879	0.00880177
chr10	99766975	cg08649440	CRTAC1	-0.105831	0.00884401
chr2	177028804	cg10304824	HOXD3	0.109365	0.00887181
chr5	158360366	cg05474370	EBF1	-0.101849	0.00887181
chr10	123506700	cg03293837	ATE1	-0.236793	0.00887181
chr16	89184591	cg10265258	ACSF3	-0.111258	0.00888637
chr15	93652578	cg04171117		-0.104523	0.00896762
chr3	14991718	cg17065772	NR2C2	-0.132605	0.00896762
chr6	30315468	cg17002518		-0.100317	0.00900923
chr12	54862339	cg20493090	GTSF1	-0.121873	0.00903164
chr15	25651288	cg10767152	UBE3A	-0.126339	0.00903164
chr7	124538660	cg21792432	POT1	-0.136427	0.00903164
chr3	52316296	cg05479130		-0.206189	0.00903606
chr16	58772325	cg02154021		-0.105398	0.0090615
chr7	7576792	cg21105443	COL28A1	-0.14247	0.00920053
chr9	137407922	cg13719295		-0.155409	0.00928677
chr18	72917450	cg25292638	ZADH2	-0.161621	0.00934249
chr2	190037419	cg08247938	COL5A2	-0.151915	0.0093534
chr4	141237092	cg24091982	SCOC	-0.162082	0.00941864
chr14	22361282	cg16702660		-0.427911	0.00946371
chr8	142159992	cg12807790	DENND3	-0.137373	0.00952941
chr21	32412191	cg06790305	KRTAP19-8	-0.106121	0.00954116
chr7	937425	cg03413857		-0.145344	0.00954116
chr5	134180823	cg12852390	C5orf24	-0.101306	0.00954749
chr4	55143285	cg21309167	PDGFRA	0.273307	0.00956722
chr4	191014397	cg08573926		0.178334	0.00956722
chr5	36202853	cg22510662	C5orf33	-0.107705	0.00956722
chr12	125482811	cg02662180	BRI3BP	-0.109771	0.00956722
chr4	155702411	cg08282428	RBM46	-0.183561	0.00965778
chr1	95167783	cg09012411		-0.101787	0.00965991
chr16	89185293	cg07944420	ACSF3	-0.145266	0.00970914
chr4	37241376	cg11034802		-0.1206	0.00971697
chr3	64264170	cg24318711		-0.113072	0.00974827
chr7	65420302	cg24972876		-0.105076	0.00997024
chr22	50893041	cg03266200	SBF1	-0.106968	0.0100384
chr1	243646787	cg06882058	SDCCAG8	-0.122009	0.010075
chr8	124784802	cg15173586	FAM91A1	-0.112652	0.0100754
chr6	106434623	cg17394530		-0.127559	0.0101372
chr6	102115051	cg24539500	GRIK2	-0.104454	0.0101486
chr19	49934577	cg03282345	SLC17A7	-0.111165	0.0101793
chr5	42756860	cg08952407	CCDC152	-0.113905	0.0101879
chr4	7938304	cg13534536	AFAP1	-0.102127	0.0101901
chr13	44596456	cg06795216	LOC121838	-0.110703	0.0102069
chr17	55337654	cg11876048	MSI2	-0.169307	0.0103239
chr3	121512184	cg10605766	IQCB1	-0.134112	0.0103484
chr4	140745554	cg16650096	MAML3	-0.111455	0.0103518
chr5	140725964	cg23470729	PCDHGA2	0.130411	0.0104156
chr11	457278	cg24247537	PTDSS2	-0.11806	0.0104201
chr15	49732282	cg13597554	FGF7	-0.147498	0.0104368
chr8	90132979	cg18321762		-0.100228	0.0104547
chr16	51130021	cg05415285		0.120668	0.0104564
chr4	7289763	cg15594605	SORCS2	-0.197963	0.0105309
chr1	235500468	cg19269426	GGPS1	-0.174593	0.0105742
chr7	2679067	cg01561864	TTYH3	-0.122388	0.0106021
chr3	168830776	cg03330522	MECOM	-0.147039	0.0106021
chr5	140719008	cg19689427	PCDHGA2	0.149515	0.0107171
chr5	142527658	cg26547816	ARHGAP26	-0.170053	0.0107355
chr17	34626096	cg03071134	CCL3L3	-0.124012	0.0107705
chr12	113655841	cg14207267	IQCD	-0.142782	0.0107705
chr9	140270145	cg13434688	EXD3	-0.129328	0.0107984
chr7	600582	cg22234154	PRKAR1B	-0.14667	0.0109135
chr22	32600914	cg24848192	RFPL2	-0.200755	0.0109894
chr7	33894296	cg24249450		-0.104627	0.0109919
chr16	24857497	cg00339695	SLC5A11	-0.117183	0.0110363
chr5	8457721	cg18371052		-0.105367	0.0111736
chr4	78074683	cg00611818		-0.100253	0.0111809
chr1	35873695	cg11254527	ZMYM4	-0.102345	0.0112594
chr19	58627859	cg15128312	ZSCAN18	-0.110195	0.011263
chr16	52641824	cg10109421		-0.12394	0.011263
chr9	134536436	cg14310198	RAPGEF1	-0.162788	0.0112873
chr8	1785958	cg07264062	ARHGEF10	-0.107049	0.0113187
chr7	129856472	cg12134602	C7orf45	-0.298276	0.0115152
chr21	29910411	cg25912938	NCRNA00161	-0.103308	0.0115587
chr12	132879967	cg04460093	GALNT9	-0.121996	0.0116122
chr3	181918981	cg02957997		-0.143114	0.0117164
chr7	126698344	cg02090654	MIR592	-0.10367	0.0117676
chr17	38821429	cg11641791	KRT222	0.102201	0.0118895
chr1	176998705	cg11834729	MIR488	-0.103535	0.0119001
chr1	55014160	cg01802772	ACOT11	0.340044	0.0120798
chr10	17569855	cg12476230		-0.136672	0.0121401
chr10	92912529	cg23034437	NUDT9P1	-0.143996	0.0121623
chr17	3235736	cg18920490		-0.101659	0.0121923
chr8	46950927	cg24020452		-0.111753	0.0121923
chr16	1006052	cg05836256	LMF1	-0.130292	0.0123089
chr9	91618456	cg14448588	S1PR3	-0.103113	0.0123113
chr5	42757171	cg21929564	CCDC152	-0.128442	0.0123113
chr10	102108974	cg16744911	SCD	0.129721	0.0124135
chr10	73534338	cg11633461	C10orf54	-0.142647	0.0125549
chr14	95951499	cg23413464		-0.102167	0.0125718
chr19	45417526	cg00397545	APOC1	0.117665	0.0126053
chr14	20710905	cg05122082	OR11H4	-0.114729	0.0126145
chr8	71127379	cg13335567	NCOA2	-0.150409	0.0126615
chr21	41173950	cg24698780	IGSF5	-0.10203	0.0127862
chr10	115939651	cg27580689	TDRD1	-0.1274	0.0128092
chr11	120853286	cg05431964	GRIK4	-0.110182	0.0128154
chr14	22370643	cg12819537		-0.311639	0.0128674
chr15	79094603	cg25490185	ADAMTS7	-0.1017	0.0129121
chr5	140514824	cg24583624	PCDHB5	0.105811	0.0129641
chr6	32796216	cg08327277	TAP2	-0.115311	0.0129641
chr1	146555624	cg24853868		-0.221536	0.012975
chr9	34370894	cg13746854	KIAA1161	0.158618	0.0129807
chr7	130129946	cg17706086	MESTIT1	-0.148155	0.0129807
chr4	20529994	cg22508905	MIR218-1	-0.130449	0.0129919
chr16	72096449	cg10430994	HPR	-0.10246	0.0130181
chr5	154253549	cg12938814	CNOT8	-0.105596	0.0130181
chr8	119861592	cg26828533		-0.121416	0.0130707
chr1	231490578	cg22723249		-0.110468	0.0132112
chr2	218343265	cg24079981	DIRC3	-0.136268	0.0132112
chr12	64415282	cg05508355	SRGAP1	-0.154348	0.0132112
chr6	170392861	cg18847474		-0.116107	0.0134916
chr17	78864539	cg05774614	RPTOR	-0.140255	0.0135239
chr5	140724362	cg11236452	PCDHGA2	0.128403	0.013563
chr11	124439882	cg21196772	OR8A1	-0.170746	0.0135894
chr12	81099740	cg01581686		-0.118337	0.0136255
chr22	38489645	cg19629216	BAIAP2L2	-0.116824	0.0136739
chr1	91360840	cg00347228		-0.128377	0.0136739
chr12	52596367	cg19445044		-0.134332	0.0136768
chr12	106010541	cg11721178		-0.111194	0.0137137
chr17	5673881	cg15255086		0.136717	0.0138187
chr3	115553845	cg18746334	LSAMP	-0.108091	0.0138258
chr6	128240363	cg27638432	THEMIS	-0.106217	0.0138357
chr18	54788429	cg03012785		-0.122712	0.0139052
chr7	27138173	cg18751141		-0.132349	0.0139677
chr1	44300942	cg09989037	ST3GAL3	-0.150192	0.0139677
chr10	104885967	cg02822087	NT5C2	-0.106104	0.0139739
chr14	50560801	cg14516566	C14orf183	-0.107688	0.013996
chr4	186048269	cg10712884		-0.130238	0.013996
chr16	89822399	cg05105054	FANCA	-0.104893	0.0139967
chr7	2647039	cg16313758	IQCE	-0.108934	0.0139967
chr9	135650088	cg14000282	C9orf98	-0.122058	0.0140051
chr10	82404135	cg27421810	SH2D4B	-0.151297	0.0140805
chr20	45314291	cg16836388	SLC13A3	-0.14891	0.0140919
chr7	27138850	cg17881200		-0.163221	0.0141446
chr22	41788401	cg20107201	TEF	-0.115507	0.0141474
chr15	34634263	cg12390237	NOP10	0.118328	0.0141503
chr12	56819060	cg09107438	TIMELESS	-0.120064	0.0141505
chr7	95945241	cg17286985	SLC25A13	-0.109135	0.01417
chr8	142160081	cg21442881	DENND3	-0.147291	0.01421
chr6	7048351	cg18211585		-0.125906	0.0142536
chr5	110453339	cg10456769	WDR36	-0.11978	0.0142543
chr18	6283067	cg14123034	L3MBTL4	-0.293487	0.0142777
chr3	54970460	cg25214305	CACNA2D3	-0.107287	0.0142809
chr6	16227423	cg24544003		-0.116027	0.0142809
chr3	49710768	cg04264726	APEH	0.125653	0.0143311
chr6	129462493	cg17422019	LAMA2	-0.112077	0.0143357
chr13	23310635	cg05656990		-0.144518	0.014425
chr2	1843184	cg20846728	MYT1L	-0.129171	0.0144329
chr2	232761931	cg03608583		-0.131236	0.0144329
chr8	144361315	cg03894796		0.148716	0.0145334
chr3	196750939	cg18025886	MFI2	-0.111001	0.0145567
chr11	299668	cg05733139	IFITM5	-0.124578	0.0145567
chr4	155702409	cg22103164	RBM46	-0.143488	0.0145567
chr5	114761245	cg04282307		-0.204169	0.0145567
chr12	124429295	cg17723958	CCDC92	-0.156737	0.014608
chr10	77542302	cg03448754	C10orf11	-0.192226	0.014608
chr14	47872288	cg19503462	MDGA2	-0.186075	0.0147112
chr8	145029603	cg21535931	PLEC1	-0.127792	0.01475
chr13	110528090	cg14256028		0.134666	0.0147945
chr13	114275670	cg09244037	TFDP1	-0.158823	0.0148068
chr4	24415155	cg27462975		-0.105193	0.0148322
chr4	128133312	cg02421175		-0.115505	0.0148361
chr12	41085901	cg09143195	CNTN1	0.133161	0.0148377
chr10	22970764	cg01445578	PIP4K2A	-0.198132	0.014853
chr1	146550074	cg16814483		-0.205592	0.0149046
chr8	144359074	cg06070970	GLI4	0.100691	0.0149053
chr4	151186111	cg05871425	LRBA	-0.108818	0.014908
chr13	44990174	cg24852565		-0.130705	0.0149182
chr15	82343556	cg27407390		-0.107464	0.0149513
chr7	8277690	cg23347850	ICA1	-0.100786	0.0150572
chr10	111683654	cg17093267	XPNPEP1	-0.104072	0.0151525
chr1	46144754	cg27171835	GPBP1L1	-0.140648	0.0151881
chr1	172378938	cg20420249	DNM3	-0.121794	0.0152292
chr7	63353570	cg21005510		-0.131777	0.0152426
chr5	73883404	cg24976258		-0.106624	0.0152576
chr11	103480630	cg02730303		0.1956	0.0153133
chr12	9227320	cg16314263	A2M	-0.122783	0.0153444
chr7	27137922	cg07278425		-0.118449	0.015427
chr14	29258014	cg15506863	C14orf23	-0.125851	0.015427
chr12	12848977	cg19360852	GPR19	0.11601	0.0154435
chr5	179982651	cg24134182	CNOT6	-0.113644	0.0154569
chr6	11360140	cg20808089	NEDD9	-0.116995	0.0154569
chr7	27173776	cg23515420		-0.141439	0.015473
chr8	37755555	cg14089503	RAB11FIP1	0.179673	0.0155304
chr6	10389490	cg18290739		-0.100491	0.0156044
chr6	168372652	cg02893547	MLLT4	-0.109096	0.0156324
chr4	6107339	cg22098660	JAKMIP1	-0.114704	0.0156757
chr1	227686895	cg01576459		-0.102041	0.0157472
chr9	139590760	cg26270899		-0.126578	0.0157472
chr11	56086656	cg27314580	OR8K3	-0.105523	0.0158064
chr8	58057665	cg03587650		-0.112903	0.0160562
chr4	1513089	cg25034424		-0.167563	0.016096
chr10	133791976	cg02365648	BNIP3	-0.143428	0.0161256
chr3	180550814	cg19107112		-0.114429	0.0161591
chr12	127359914	cg16883901		-0.204895	0.0161709
chr1	156459986	cg11739633	MEF2D	-0.124809	0.016212
chr2	99613938	cg08885076	TSGA10	-0.13249	0.0162367
chr17	10612342	cg16533245	C17orf48	-0.159616	0.0162367
chr11	10823130	cg23632804	SNORD97	-0.13063	0.0163055
chr5	156479607	cg12943317	HAVCR1	-0.102081	0.0163102
chr6	127796683	cg20390711	C6orf174	-0.109575	0.0163207
chr2	220007315	cg08106288	NHEJ1	-0.122456	0.0163246
chr10	95225718	cg12686314	MYOF	0.121697	0.0163821
chr22	41215824	cg26356892	SLC25A17	0.101453	0.0164717
chr16	75735341	cg00197191		-0.102607	0.0166039
chr7	63209449	cg21311223		-0.114941	0.016604
chr2	175430595	cg20899190	WIPF1	-0.153113	0.0166111
chr8	1872335	cg01607321	ARHGEF10	-0.126896	0.0166843
chr14	105708343	cg13528570	BRF1	-0.100708	0.0166864
chr5	54601060	cg26464796	DHX29	-0.107822	0.0167436
chr6	87923115	cg26218229	ZNF292	-0.107903	0.0167436
chr11	110763302	cg08967391		-0.110185	0.0167627
chr16	68566863	cg09754882		-0.101185	0.0169513
chr2	182543706	cg20806345	NEUROD1	-0.11816	0.0169513
chr10	75282672	cg18703721	USP54	-0.128499	0.0169774
chr15	57579076	cg26810157	TCF12	-0.12616	0.0169852
chr5	111684298	cg13967811	EPB41L4A	-0.11538	0.0170089
chr12	132170153	cg15387567		-0.103976	0.0170412
chr7	155091523	cg21341645	INSIG1	0.146401	0.0170598
chr8	38212404	cg08167846	WHSC1L1	-0.103845	0.0170655
chr11	12396256	cg05646174		-0.164297	0.0171118
chr2	183683268	cg10506151		-0.120998	0.0171368
chr17	53319726	cg23973166		-0.123603	0.0171938
chr7	155151427	cg14927855		-0.147113	0.017253
chr2	157184499	cg20570611	NR4A2	-0.105388	0.017274
chr5	158531511	cg08777316		0.120791	0.0173152
chr10	105885769	cg15471398	C10orf78	-0.11866	0.0173152
chr5	178632502	cg05574515	ADAMTS2	-0.125324	0.0173152
chr1	245769124	cg14792075	KIF26B	-0.142658	0.0173198
chr4	182609697	cg17715141		-0.106658	0.0173944
chr15	44223008	cg02449670	FRMD5	-0.192362	0.0174225
chr12	102129168	cg02399275	SYCP3	-0.126265	0.0174366
chr7	137660322	cg13016916	CREB3L2	-0.128285	0.0174712
chr5	140730469	cg16574737	PCDHGB1	0.150635	0.0174977
chr7	155151195	cg26463496		-0.123674	0.0175037
chr1	146548657	cg22671717		-0.13058	0.017625
chr8	11251609	cg06938143	C8orf12	-0.173366	0.0176845
chr2	22416541	cg11781676		-0.103387	0.0176978
chr2	227560785	cg22304519		-0.371958	0.0177423
chr5	31361135	cg20539449		-0.131822	0.0177573
chr5	23507573	cg09166973	PRDM9	-0.126062	0.0177946
chr2	173319893	cg03779937	ITGA6	-0.127017	0.0178431
chr4	170925670	cg26646203	MFAP3L	-0.108022	0.0178568
chr7	1883251	cg25814293	MAD1L1	-0.149332	0.0178568
chr10	3809095	cg02813265		-0.101087	0.0178735
chr1	71543274	cg26860848	ZRANB2	-0.113083	0.0178735
chr11	129308733	cg15571705	BARX2	-0.101489	0.0179808
chr8	3100524	cg06710438	CSMD1	-0.10759	0.0179808
chr6	130683019	cg09847490		-0.185755	0.0179808
chr20	3644300	cg20442941	GFRA4	-0.13385	0.0180079
chr12	22952457	cg25832867		-0.100967	0.0180133
chr3	99945494	cg00128054		-0.114694	0.0180133
chr7	100136013	cg01338043	AGFG2	-0.105541	0.0180385
chr4	187629336	cg24820270	FAT1	-0.116103	0.0180531
chr2	191883483	cg03110996		-0.108889	0.0180882
chr3	178254213	cg08812936	KCNMB2	0.102388	0.0181428
chr1	237272840	cg09469682	RYR2	-0.111842	0.0181605
chr10	88628344	cg25946646	BMPR1A	-0.103103	0.0182198
chr8	129912602	cg16318882		-0.110739	0.0182938
chr12	95263815	cg20883882		-0.110757	0.0182938
chr17	58465313	cg01418536	USP32	-0.15216	0.018318
chr2	153413442	cg12505929	FMNL2	-0.106916	0.0183627
chr11	60534978	cg23117439	MS4A15	-0.108021	0.0183794
chr7	100073281	cg00376553	TSC22D4	-0.12399	0.0183999
chr5	82845599	cg04223006	VCAN	-0.146747	0.0184362
chr10	35683073	cg04922063	CCNY	-0.121493	0.018517
chr15	25726500	cg05390077		0.100746	0.0185662
chr2	171552304	cg19828869		-0.129936	0.0188661
chr7	1938450	cg08176258	MAD1L1	-0.104315	0.0189263
chr6	83602712	cg13800569	UBE2CBP	-0.106857	0.0189574
chr6	100893665	cg00407329	SIM1	-0.103512	0.0189832
chr21	43989949	cg08407901	SLC37A1	0.346215	0.0190604
chr11	34681375	cg22121565	EHF	-0.126103	0.0190958
chr7	158954987	cg14709381		-0.101873	0.0191042
chr2	50570407	cg06707406	NRXN1	-0.138577	0.0191353
chr1	155484600	cg23589035	ASH1L	-0.154633	0.0191759
chr13	112575735	cg08121117		-0.119235	0.0192388
chr2	151070505	cg02311630		-0.11374	0.0192575
chr13	103821434	cg23061121		-0.119498	0.0193823
chr13	39980228	cg08530065	LHFP	-0.140186	0.0193823
chr15	69222988	cg14554415	MIR548H4	-0.110564	0.0194017
chr3	65469946	cg16177445	MAGI1	-0.104489	0.0194123
chr17	18553533	cg11515089		-0.124101	0.0194144
chr11	44068491	cg15035528	ACCSL	-0.125178	0.0194252
chr7	56354974	cg00348647		-0.107034	0.0194552
chr20	42142947	cg11319028	L3MBTL	-0.12139	0.0194552
chr4	159095085	cg07271580	FAM198B	-0.124511	0.0194649
chr21	43809848	cg07374224	TMPRSS3	-0.132576	0.0194649
chr2	98962444	cg22408503	CNGA3	-0.102051	0.0195346
chr8	13122767	cg01624348	DLC1	-0.109194	0.0196862
chr14	20933373	cg02943091		-0.11243	0.019693
chr8	39792086	cg11363097	IDO2	-0.104097	0.0197145
chr3	171002363	cg10180092	TNIK	-0.115636	0.0198751
chr22	34192387	cg20021572	LARGE	-0.123058	0.0198751
chr10	91589236	cg26182317		-0.105337	0.0198851
chr1	82049635	cg26542856		-0.101103	0.0199504
chr1	79801791	cg22454053		-0.111665	0.0199504
chr11	112096625	cg15300101	PTS	0.112232	0.0199819
chr5	71613149	cg26293423	MRPS27	-0.13502	0.0200038
chr6	32055072	cg12409083	TNXB	-0.105327	0.0200162
chr6	32337970	cg13318964	C6orf10	-0.11081	0.0200469
chr13	113528166	cg07343790	ATP11A	-0.149415	0.0201202
chr8	145579317	cg03753385	FBXL6	-0.111259	0.0201514
chr1	8778323	cg10589840	RERE	-0.111909	0.020161
chr11	13633278	cg26333512		-0.105526	0.0202042
chr3	112530978	cg14954688		-0.116948	0.0202182
chr16	23511855	cg03935956	GGA2	0.108564	0.0202434
chr3	16974681	cg24159436	PLCL2	-0.117504	0.0202434
chr13	111806949	cg13127231	ARHGEF7	0.126725	0.0202474
chr6	36947277	cg07068382	MTCH1	-0.106106	0.0202474
chr15	40508893	cg12378950	BUB1B	-0.175321	0.0202486
chr2	157182707	cg10089963	NR4A2	-0.122944	0.0203253
chr17	60838190	cg16578923	2022-03-10	-0.115643	0.0203427
chr10	2544120	cg17750572		-0.11203	0.020368
chr10	108335668	cg20363199	SORCS1	-0.132455	0.020368
chr10	101910498	cg20720056	ERLIN1	-0.116638	0.0204142
chr16	34979671	cg02415963		0.105521	0.0206255
chr3	159975476	cg06644892	IFT80	-0.126807	0.0206457
chr4	148767763	cg26338428	ARHGAP10	-0.137474	0.0206457
chr8	128079561	cg11123619		-0.219615	0.0207255
chr13	24552617	cg02106712		-0.121799	0.0207322
chr1	146752023	cg21392281	CHD1L	-0.146137	0.0207322
chr2	201182777	cg14361895	SPATS2L	0.110391	0.020734
chr17	63100218	cg25027367		-0.127921	0.0208946
chr12	95226786	cg10549753	MIR492	0.188473	0.0209196
chr2	140126832	cg22742060		-0.106973	0.020974
chr19	4949393	cg20604957	UHRF1	-0.108005	0.0209834
chr5	8458392	cg23522872		-0.128847	0.0210312
chr8	40616749	cg20630363	ZMAT4	-0.104657	0.0210662
chr1	150130379	cg05955036	PLEKHO1	-0.115677	0.0210665
chr16	3334273	cg16748088	ZNF263	0.113442	0.0211034
chr8	143376371	cg24849373	TSNARE1	-0.265406	0.0211646
chr22	45182358	cg04181864	ARHGAP8	-0.100683	0.021226
chr11	15200692	cg02742555	INSC	-0.11373	0.0212313
chr10	27703329	cg02933909	PTCHD3	-0.128345	0.0213163
chr3	141748862	cg02710161		-0.137221	0.0213276
chr16	86743964	cg06386009		-0.106182	0.0213494
chr5	38501577	cg26437306	LIFR	-0.125384	0.0214024
chr10	485298	cg16326335	DIP2C	-0.103448	0.0214239
chr3	174792068	cg09602541	NAALADL2	-0.107666	0.0214732
chr8	131213177	cg26966989	ASAP1	-0.1081	0.0214757
chr5	6729662	cg15690760	POLS	-0.169985	0.0215398
chr6	4931093	cg12787036	CDYL	-0.123433	0.0215566
chr10	864596	cg18556420	LARP4B	-0.136272	0.0216105
chr6	32783551	cg00409309	HLA-DOB	-0.147155	0.0216105
chr10	49705591	cg03717961	ARHGAP22	-0.111065	0.0216432
chr22	27018010	cg26822175	CRYBA4	-0.111348	0.0216432
chr7	148977647	cg07878625	ZNF783	-0.447073	0.0216432
chr6	166577958	cg24299087	T	-0.160207	0.0217256
chr6	14911904	cg13746813		-0.144721	0.0217257
chr12	66062166	cg05413700		-0.106787	0.0218049
chr11	46389249	cg12856521	DGKZ	0.161425	0.0218261
chr6	21971325	cg06429439	FLJ22536	0.107798	0.0218314
chr19	54269519	cg04727458		-0.348393	0.021932
chr1	117035969	cg26218047		-0.110381	0.021962
chr19	36726982	cg23388763	ZNF146	-0.10484	0.0220612
chr2	217410850	cg06280965		-0.159682	0.022105
chr5	150157442	cg04051335	C5orf62	-0.139018	0.0221375
chr11	113258908	cg14455319	ANKK1	0.101455	0.022154
chr8	603360	cg26776327		-0.100419	0.022154
chr8	97249283	cg04462334	UQCRB	-0.103621	0.022154
chr3	94160438	cg05293646		-0.109595	0.022154
chr1	145456128	cg19266329		0.101825	0.0221844
chr19	37620041	cg02705894	ZNF420	-0.15311	0.0222503
chr18	77905298	cg13704680	LOC100130522	-0.168691	0.0223503
chr1	110426090	cg26433561		-0.105083	0.0223588
chr4	188423066	cg16259043		-0.117959	0.0223796
chr6	31863179	cg27624310	EHMT2	-0.118537	0.0223796
chr14	79840647	cg04897790	NRXN3	-0.108759	0.0223834
chr16	1797050	cg07869343	MAPK8IP3	-0.196905	0.0224161
chr4	91570600	cg15687147	FAM190A	-0.107608	0.0224186
chr11	45760790	cg10529994		-0.10978	0.0224233
chr6	160541976	cg13434757	SLC22A1	-0.135923	0.022483
chr1	2846998	cg12415455		-0.11524	0.0224964
chr10	21787079	cg18224988	C10orf114	-0.110727	0.0225181
chr5	140515961	cg24958687	PCDHB5	0.123058	0.0225251
chr7	97821646	cg23396843	LMTK2	-0.110906	0.0226115
chr13	112631009	cg21518151		-0.120726	0.0226257
chr7	110658544	cg17404760	IMMP2L	-0.13573	0.0226538
chr2	157184978	cg17654050	NR4A2	-0.14773	0.0226731
chr10	99278449	cg10989317	UBTD1	-0.266519	0.0226764
chr9	94490038	cg14503200	ROR2	-0.128499	0.0226918
chr11	124788414	cg23530543	HEPN1	-0.133739	0.0227241
chr14	92301922	cg19873923	TC2N	0.119627	0.0227547
chr12	19310593	cg14504168	PLEKHA5	-0.126422	0.0227637
chr1	146549909	cg21263664		-0.199418	0.022832
chr6	22190121	cg04004744	FLJ22536	-0.100304	0.0228528
chr14	62333736	cg24741793		-0.122049	0.0229885
chr11	2846681	cg19852660	KCNQ1	0.138591	0.0230085
chr11	75230135	cg05521767	GDPD5	-0.120072	0.0230202
chr14	40809000	cg23517797		-0.114086	0.023021
chr11	72044829	cg12536891	CLPB	-0.104297	0.0230356
chr5	67466813	cg17504791		-0.113483	0.0230356
chr13	114869122	cg23640744	RASA3	-0.131577	0.0230356
chr12	8126685	cg19568722		-0.126738	0.023069
chr11	1578502	cg19369780	DUSP8	-0.107939	0.0230801
chr11	60232654	cg25996571	MS4A1	-0.143557	0.0230801
chr17	54893150	cg05514006	C17orf67	-0.146458	0.0231132
chr6	133486947	cg14991764		-0.10207	0.0231443
chr7	6653510	cg08693140		0.331722	0.0232198
chr7	73253049	cg01679206	WBSCR27	0.10215	0.0232198
chr3	114128301	cg14659930	ZBTB20	-0.114841	0.0232346
chr11	12748969	cg26207102	TEAD1	-0.106668	0.023339
chr6	14917345	cg07187202		-0.165735	0.023339
chr2	23840739	cg14067761	KLHL29	-0.101675	0.0233941
chr14	23058779	cg16285447	DAD1	0.112667	0.0234553
chr10	35615923	cg19997922	CCNY	-0.101103	0.0235385
chr1	114936927	cg23725246	TRIM33	-0.142485	0.0235667
chr15	60688948	cg14397690	ANXA2	0.148247	0.0235813
chr2	150419026	cg27597853		-0.103079	0.0235813
chr5	1097374	cg17851021	SLC12A7	-0.106038	0.0235813
chr17	78735596	cg16565901	RPTOR	-0.148055	0.0235813
chr18	14378826	cg12865953		-0.100337	0.0235966
chr5	150530752	cg14870539	ANXA6	-0.128028	0.0237434
chr3	18484742	cg00390724		-0.105648	0.0237917
chr8	8175407	cg26550646	PRAGMIN	-0.1031	0.0238314
chr1	147246154	cg11423701	GJA5	-0.1572	0.0238493
chr20	1920407	cg12122241	SIRPA	-0.144854	0.0239496
chr11	300490	cg14402017	IFITM5	-0.119979	0.0239523
chr5	134099619	cg10647441	DDX46	-0.153323	0.0240518
chr8	13155283	cg22045977	DLC1	-0.119234	0.0241503
chr3	194091167	cg07048348	LRRC15	-0.136632	0.0241503
chr15	73075003	cg03441853	ADPGK	0.104393	0.0241943
chr5	140530222	cg23596123	PCDHB6	0.127946	0.0242321
chr4	7799701	cg23351190	AFAP1	-0.111784	0.0242898
chr2	109257429	cg05310309	LIMS1	-0.131874	0.0244779
chr10	64431533	cg27076160	ZNF365	-0.207694	0.024511
chr3	170609282	cg04799778	EIF5A2	-0.147209	0.0245872
chr8	142192468	cg24346659	DENND3	-0.102906	0.0246014
chr9	137277819	cg13931640	RXRA	-0.13677	0.0248143
chr3	194409431	cg11740416	FAM43A	-0.124594	0.0248257
chr18	3771151	cg25439807	DLGAP1	0.109701	0.0248362
chr20	520296	cg02284850	CSNK2A1	-0.107767	0.0248528
chr13	69587760	cg19741868		-0.111957	0.0248568
chr7	158349388	cg00635695	PTPRN2	-0.102012	0.0249163
chr10	75114512	cg07572223	TTC18	-0.112912	0.0249895
chr1	200994098	cg15288326	KIF21B	-0.121098	0.0250684
chr6	26865862	cg18867708	GUSBL1	0.127794	0.0250849
chr1	156624237	cg20299670	BCAN	-0.302744	0.0250948
chr16	89550474	cg08726900	ANKRD11	-0.163515	0.0251855
chr6	52173014	cg01761966		-0.101183	0.0252993
chr7	89870607	cg24822552		-0.128534	0.0253044
chr2	175593789	cg21783033		-0.135472	0.0253419
chr21	15352957	cg06343169	C21orf81	-0.125348	0.0253472
chr13	28130393	cg06394460	LNX2	-0.108625	0.0253749
chr8	58056026	cg08219700		-0.17979	0.0254024
chr16	24857579	cg23280807	SLC5A11	-0.111766	0.0254413
chr15	43514627	cg18450625	EPB42	-0.161125	0.0254441
chr13	113674587	cg14219365	MCF2L	-0.159638	0.0254829
chr7	27183375	cg04863892	HOXA5	0.114592	0.0255347
chr17	73558434	cg22534919	LLGL2	-0.103137	0.0255795
chr13	39584965	cg13152990	C13orf23	-0.10532	0.0256116
chr3	146371310	cg01532392		-0.117364	0.0256116
chr9	101912842	cg13827209	TGFBR1	-0.126227	0.0256116
chr2	7560825	cg13449463		-0.104732	0.0256733
chr7	83379152	cg17123384		-0.10564	0.0256733
chr19	594272	cg23988024	HCN2	-0.11406	0.0257176
chr8	141342131	cg26429042	TRAPPC9	-0.114541	0.0257176
chr15	50471108	cg13402936		-0.103815	0.0257345
chr2	241459502	cg08276645	ANKMY1	0.127761	0.0258332
chr14	88793741	cg10867349	KCNK10	-0.104683	0.0258387
chr1	113467640	cg07572909	SLC16A1	-0.13724	0.0258387
chr6	170411827	cg05441937		-0.1045	0.0258818
chr7	22193601	cg09902818	RAPGEF5	-0.119901	0.0259376
chr5	149546946	cg00919055	CDX1	0.130193	0.026018
chr1	61715231	cg19726852	NFIA	-0.108286	0.026018
chr4	4167577	cg19556341		0.108825	0.0260431
chr11	34457835	cg04464122		-0.139493	0.0260457
chr15	91460071	cg20507228	MAN2A2	-0.15315	0.026079
chr17	48758651	cg04433051	ABCC3	-0.110508	0.0260983
chr2	152220529	cg03406844	TNFAIP6	-0.140868	0.0260983
chr7	148394542	cg18597411	CUL1	-0.124611	0.0261192
chr16	28123059	cg08766770	XPO6	-0.100057	0.0261194
chr1	81978221	cg24256191		-0.105228	0.0261194
chr15	65674523	cg24118197	IGDCC4	-0.122583	0.0261759
chr20	23015091	cg01471923	SSTR4	-0.124554	0.0261759
chr12	110891467	cg01061553	GPN3	-0.129714	0.0262221
chr10	91343467	cg17051995	PANK1	-0.105326	0.0262331
chr11	75024611	cg21756647	ARRB1	0.128665	0.0262749
chr3	116134983	cg14645264	LSAMP	-0.136683	0.0263541
chr16	1722957	cg04245870	CRAMP1L	-0.174347	0.0264289
chr7	76871793	cg15154628	CCDC146	-0.111298	0.0264301
chr4	72903914	cg14010852	NPFFR2	-0.145367	0.0264594
chr15	49267825	cg20860806		-0.151576	0.026482
chr6	130459436	cg21172454	L3MBTL3	-0.246043	0.026482
chr6	32365665	cg24290586	BTNL2	-0.108778	0.0265151
chr10	130302534	cg13949713		-0.159314	0.0265151
chr11	6415462	cg18477969	SMPD1	-0.239019	0.0265215
chr2	232333030	cg01443467		-0.108007	0.0265794
chr2	105069200	cg08641706	LOC150568	-0.102234	0.0266506
chr2	40575296	cg13411948	SLC8A1	-0.108235	0.0266506
chr7	105306555	cg11957130	ATXN7L1	-0.328109	0.0266506
chr1	224351941	cg01903702		-0.158852	0.0267114
chr20	60121895	cg10965434	CDH4	-0.111695	0.026721
chr15	69222592	cg17286244	MIR548H4	-0.107607	0.0268123
chr4	14451768	cg07075387		-0.125913	0.0268782
chr2	19417431	cg20520561		-0.101616	0.0269472
chr11	64563992	cg14651616	MAP4K2	-0.101981	0.0269472
chr6	5378917	cg08557624	FARS2	-0.105719	0.0269472
chr4	183128657	cg06149333		-0.107061	0.0269472
chr16	85112370	cg04782146	KIAA0513	-0.119438	0.0269472
chr1	167791030	cg09372808	ADCY10	-0.129142	0.0269758
chr17	1549098	cg12485428	SCARF1	-0.127868	0.027036
chr10	95288142	cg18644897	CEP55	-0.106293	0.0270519
chr15	47753061	cg21560526		0.122554	0.0272129
chr20	20036684	cg16691087	C20orf26	-0.111913	0.0272141
chr4	71811504	cg04576707	MOBKL1A	-0.124022	0.0272487
chr19	14671371	cg23690893	TECR	-0.139677	0.0272994
chr16	88361441	cg10278915		-0.121077	0.0273607
chr8	142363160	cg21934190		-0.132411	0.027402
chr7	27138712	cg17485838		-0.19921	0.0274838
chr2	168253571	cg17399745		-0.111693	0.0275019
chr5	115425060	cg10875794	COMMD10	-0.115218	0.0275212
chr1	12241073	cg05599723	TNFRSF1B	-0.172229	0.0275354
chr19	6372277	cg05968233	ALKBH7	0.119183	0.0275625
chr8	92806132	cg03006531		-0.167727	0.0275625
chr12	66742565	cg26485003	GRIP1	-0.107786	0.0276213
chr6	170608479	cg27495951		-0.117233	0.0276887
chr7	2124459	cg08858130	MAD1L1	-0.121769	0.0277826
chr7	28422279	cg07340599	CREB5	-0.144871	0.0277826
chr9	136654631	cg13754665	VAV2	-0.130694	0.0278218
chr2	211096859	cg25075459		-0.107856	0.0278297
chr6	42947671	cg18889437	PEX6	-0.131807	0.0278819
chr5	74163723	cg00137855	FAM169A	-0.132074	0.0278819
chr4	47938433	cg18995844	CNGA1	-0.104464	0.0279033
chr11	60869960	cg24674703	CD5	-0.120429	0.0279033
chr12	13301010	cg08298946		-0.118758	0.027918
chr2	99872119	cg05043910	LYG2	-0.110101	0.0279305
chr19	7615600	cg00401032	PNPLA6	0.105917	0.0279793
chr17	41221539	cg18830083	BRCA1	-0.111614	0.0280254
chr5	140248610	cg25024993	PCDHA7	-0.101084	0.0280863
chr1	89592725	cg15718932	GBP2	-0.106898	0.0281389
chr5	23507617	cg25472530	PRDM9	-0.119148	0.0281448
chr4	119941819	cg23493867	SYNPO2	-0.103769	0.028263
chr10	129949058	cg00586527		-0.105918	0.0283181
chr20	33266296	cg17162808	PIGU	-0.165096	0.0283247
chr1	246203591	cg09016610	SMYD3	-0.125649	0.0284347
chr2	242048359	cg24169315	PASK	-0.118117	0.028437
chr6	89347363	cg26109884	RNGTT	-0.10986	0.028438
chr12	322831	cg12415569	SLC6A12	0.121805	0.0284982
chr10	89876324	cg13404688		-0.173743	0.0285553
chr5	176797999	cg16006841	RGS14	-0.2994	0.0285553
chr3	16974217	cg19448816	PLCL2	-0.126182	0.0285799
chr3	72433837	cg10805254	RYBP	-0.153307	0.0285989
chr4	79358764	cg14091154	FRAS1	-0.149716	0.0286917
chr8	1940413	cg11085616	KBTBD11	-0.109962	0.0286955
chr18	3730593	cg18389339	DLGAP1	-0.102971	0.0287153
chr1	245851610	cg15561613	KIF26B	-0.116826	0.0287214
chr12	95226807	cg11212178	MIR492	0.19702	0.0287656
chr10	66813744	cg07030516		-0.100091	0.0287777
chr10	134093274	cg23740417	STK32C	-0.106108	0.0288817
chr10	111152929	cg06749524		-0.179318	0.028904
chr8	30341419	cg21853581	RBPMS	-0.100761	0.0289598
chr19	58322078	cg11546251	ZNF552	0.10738	0.0289652
chr19	53996201	cg06427011	ZNF813	-0.107987	0.0289999
chr10	27703336	cg00632657	PTCHD3	-0.110752	0.029063
chr1	163437170	cg23261375		-0.121389	0.0291264
chr20	25448861	cg26101502	NINL	-0.115188	0.0291356
chr7	1174784	cg07665923	C7orf50	-0.110322	0.0291561
chr4	99186446	cg18936471	RAP1GDS1	-0.103362	0.0291867
chr5	77783895	cg18281939	LHFPL2	-0.145211	0.0291867
chr14	59365905	cg07937555		-0.132868	0.0292078
chr11	102638706	cg00496961		-0.108655	0.0292132
chr7	157557461	cg02945866	PTPRN2	-0.167805	0.0292301
chr5	140430569	cg23146560	PCDHB1	-0.105613	0.0292514
chr10	695859	cg01263942	DIP2C	-0.128001	0.0292577
chr10	99912042	cg26450259	C10orf28	0.156804	0.0292882
chr5	52872072	cg07401745	NDUFS4	-0.116701	0.0293196
chr5	23507656	cg01667892	PRDM9	-0.119993	0.0293196
chr1	43537960	cg17898054		-0.130308	0.0293214
chr6	15337603	cg14682005	JARID2	-0.104911	0.0293274
chr3	69590374	cg16629288		0.1024	0.0294139
chr11	67052992	cg08670658	ADRBK1	-0.159353	0.0294139
chr15	68370885	cg03290748	PIAS1	-0.108668	0.0295627
chr5	10437652	cg10446107		-0.107351	0.0296158
chr15	44617767	cg21877473	CASC4	-0.126535	0.0296395
chr3	75263641	cg12798564		-0.17317	0.0296411
chr2	189834269	cg17343184		-0.109695	0.0296471
chr5	71795159	cg11246580	ZNF366	-0.119212	0.0297032
chr6	157140947	cg00877708	ARID1B	-0.137382	0.0297321
chr3	3885955	cg15999997	LRRN1	-0.103198	0.0297719
chr16	87468092	cg03684571	ZCCHC14	-0.121097	0.029811
chr13	110132672	cg14253596		-0.110523	0.0298293
chr19	55416788	cg11356156	NCR1	-0.101105	0.029852
chr12	65894458	cg16204717		0.138504	0.0299018
chr20	36041285	cg20891842		0.101816	0.030081
chr10	22768167	cg19301501		-0.11829	0.030081
chr16	89168599	cg04252928	ACSF3	-0.135836	0.0301162
chr2	225445666	cg21679969	CUL3	-0.105589	0.0301701
chr17	8082780	cg09186482		-0.120283	0.0301716
chr11	5019849	cg23434090	OR51L1	-0.128953	0.0301986
chr8	95303464	cg07741992		-0.102377	0.0302358
chr5	73016764	cg11781564	RGNEF	-0.114962	0.0302548
chr2	201039405	cg00397113		-0.119391	0.0303482
chr13	113688268	cg26512469	MCF2L	-0.358733	0.0303482
chr5	179741120	cg02891314	GFPT2	-0.270685	0.0303955
chr1	12600225	cg07586026		-0.109188	0.0304136
chr10	99984296	cg18121006	C10orf28	-0.115737	0.0304422
chr8	81177099	cg04967728		-0.100609	0.0304558
chr7	47344634	cg15059548	TNS3	-0.109044	0.0304756
chr4	187517847	cg03064793	FAT1	-0.138585	0.0304756
chr17	3391678	cg20195820	ASPA	-0.135591	0.0305271
chr2	43398154	cg02871985		-0.149568	0.0305871
chr10	1509190	cg11508783	ADARB2	-0.100894	0.0306786
chr1	221631542	cg26678383		-0.109801	0.0307082
chr1	146543992	cg17856063		0.10034	0.0307174
chr22	21088806	cg23205858	PI4KA	-0.108737	0.0307211
chr7	2205691	cg22327338	MAD1L1	-0.134802	0.0307211
chr2	217075573	cg25364972		-0.118803	0.0307259
chr6	20817980	cg14546115	CDKAL1	-0.117069	0.0307289
chr6	25143214	cg17688460		-0.103752	0.0307713
chr4	39175442	cg08721746		-0.123075	0.0307982
chr2	119980249	cg00030117	STEAP3	-0.145312	0.0308253
chr3	45989744	cg26466027	CXCR6	-0.155548	0.030879
chr17	57780783	cg16596536	PTRH2	-0.108407	0.0309045
chr10	7622106	cg18372739	ITIH5	-0.115296	0.0309185
chr2	25473781	cg26544247	DNMT3A	-0.122271	0.0309447
chr13	26873788	cg25797865	CDK8	-0.105049	0.0309514
chr22	50747369	cg00062282	PLXNB2	-0.112381	0.0309514
chr2	130878292	cg07221080	POTEF	-0.110609	0.0310401
chr7	93190462	cg13916255	CALCR	-0.130276	0.0310401
chr10	134103607	cg12876537	STK32C	-0.122663	0.0310765
chr8	131265658	cg26038514	ASAP1	0.356023	0.0311129
chr8	136550810	cg26019124	KHDRBS3	-0.107879	0.0311431
chr12	48546883	cg20746815	ASB8	-0.120374	0.0312232
chr10	63666609	cg19382584	ARID5B	-0.114046	0.0312253
chr3	172859699	cg10930676	SPATA16	-0.113045	0.0313109
chr5	52853787	cg24794623		-0.115977	0.0313109
chr7	113927529	cg23043162		-0.100396	0.0313245
chr11	69706622	cg08169311		0.107753	0.0313531
chr16	88059049	cg05597945	BANP	-0.137861	0.0314098
chr2	88587857	cg07813628		-0.117641	0.0314234
chr2	4051987	cg25806932		-0.101809	0.0314322
chr5	82937299	cg18852630	HAPLN1	-0.123912	0.0314322
chr1	45191110	cg26246947	C1orf228	-0.104492	0.0314777
chr3	28122982	cg07062747		-0.111861	0.0315009
chr7	145689965	cg02746640		-0.115074	0.0315036
chr4	15779642	cg04332373	CD38	-0.153409	0.0315573
chr1	46869799	cg00696472	FAAH	-0.119424	0.031565
chr8	145003653	cg24891660	PLEC1	-0.106635	0.0316143
chr19	21860753	cg08562672		0.162809	0.0316309
chr5	107011761	cg19037539		-0.102154	0.0316309
chr15	36523650	cg12019265		-0.105383	0.0316315
chr4	2404284	cg01601518	ZFYVE28	0.116045	0.0316604
chr8	11696232	cg01428454	FDFT1	-0.113172	0.0316967
chr15	64915229	cg21279316	ZNF609	-0.126361	0.0317143
chr5	150534782	cg18060909	ANXA6	-0.112053	0.0317235
chr8	40925730	cg11068881		-0.129566	0.0317235
chr2	240035107	cg16887422	HDAC4	-0.120538	0.0317462
chr13	99130655	cg02767093	STK24	-0.103281	0.0319163
chr5	176797920	cg06060754	RGS14	-0.29333	0.0319163
chr17	3183418	cg20109495	OR3A2	-0.101417	0.0319236
chr16	89168963	cg04069539	ACSF3	-0.115032	0.0320425
chr13	111854118	cg15011899	ARHGEF7	-0.131292	0.0320696
chr10	114819357	cg15624624	TCF7L2	0.121686	0.0321515
chr9	140004896	cg14649234		-0.100241	0.032166
chr18	48512555	cg25040850	ELAC1	-0.100183	0.0322163
chr5	140807225	cg21929183	PCDHGA4	0.107271	0.0322431
chr7	747746	cg00906142	PRKAR1B	-0.106064	0.0323087
chr8	111214984	cg02173067		-0.131781	0.0323402
chr4	148890890	cg05573550	ARHGAP10	-0.102394	0.0323737
chr11	1901748	cg04948649	LSP1	-0.136263	0.0324466
chr8	71564125	cg23053742	LACTB2	-0.166899	0.0324783
chr2	225441832	cg11229715	CUL3	0.24932	0.0325227
chr2	43398171	cg01243072		-0.103987	0.0326318
chr8	857079	cg17302580		-0.127467	0.0327101
chr1	219887069	cg05779991		-0.110455	0.0327405
chr1	181458839	cg17143291	CACNA1E	-0.184977	0.032743
chr15	59970199	cg12684822	BNIP2	-0.10838	0.0327847
chr13	58256880	cg22103831	PCDH17	-0.121787	0.0327964
chr6	74064298	cg02931604	DPPA5	-0.103559	0.032807
chr1	208135621	cg03887906		-0.120006	0.0328093
chr17	78860076	cg13549638	RPTOR	-0.116538	0.0328196
chr4	8012176	cg12019520	ABLIM2	-0.117055	0.032869
chr1	120315021	cg10896276		-0.135194	0.032902
chr11	79147209	cg26430023	ODZ4	-0.123793	0.0329081
chr2	162168615	cg23517954	PSMD14	-0.117938	0.0329113
chr13	43646194	cg26053469	DNAJC15	-0.10446	0.0329235
chr7	116750996	cg20707126	ST7	-0.154333	0.0329573
chr19	51017331	cg17716930	ASPDH	0.112135	0.033032
chr9	107757388	cg14327063		-0.105337	0.0331312
chr15	43560165	cg14299369	TGM5	-0.109234	0.0331632
chr5	167181519	cg17543425	ODZ2	-0.130131	0.0331792
chr4	3344154	cg17491449	RGS12	-0.101567	0.0331837
chr8	33801282	cg27188860		-0.113584	0.0331843
chr10	131341043	cg09154334	MGMT	-0.113016	0.0332283
chr5	59442548	cg26124136	PDE4D	-0.113109	0.0332637
chr2	240035894	cg05758467	HDAC4	-0.123638	0.0332637
chr18	22927454	cg20299690	ZNF521	-0.102235	0.0332747
chr1	153329512	cg23092820	S100A9	-0.103126	0.0333038
chr17	48067475	cg27199697	DLX3	-0.116043	0.0333399
chr6	163570371	cg09428340	PACRG	-0.139613	0.0333683
chr10	92645272	cg05008247	RPP30	-0.121361	0.0334248
chr4	18019937	cg20358902	LCORL	-0.105921	0.0334635
chr7	91767798	cg02007786		-0.104281	0.0334728
chr2	100017168	cg12830438	REV1	-0.105613	0.0335005
chr15	67396487	cg19193595	SMAD3	-0.127377	0.0335266
chr17	48738490	cg20004659	ABCC3	0.135836	0.0335304
chr19	56393163	cg18740359	NLRP4	-0.103349	0.0335516
chr10	18425598	cg04628741		-0.124856	0.0335516
chr6	135172385	cg16077493		-0.150634	0.0335803
chr6	170478393	cg06391732		-0.125583	0.0335861
chr6	127622363	cg06669598	ECHDC1	-0.135668	0.0335973
chr9	40698808	cg14562786	FAM75A3	0.135286	0.033636
chr5	179741104	cg23248424	GFPT2	-0.252638	0.0337072
chr4	1062280	cg15877769		-0.170429	0.0337107
chr5	79553267	cg19683073	SERINC5	0.173428	0.0337592
chr2	15566958	cg20231900	NBAS	-0.108914	0.0337592
chr2	240241218	cg10639368	HDAC4	0.112619	0.0338618
chr7	72813978	cg13578160		-0.123753	0.0338618
chr8	41522857	cg25043378	ANK1	0.122118	0.0339478
chr10	64579140	cg10601026	EGR2	-0.107051	0.0339478
chr11	58036997	cg20287029	OR10W1	-0.160328	0.0339478
chr4	151513084	cg23461126	LRBA	-0.119397	0.033972
chr2	128642357	cg09033638	AMMECR1L	0.100959	0.0340932
chr7	140718464	cg15215544		-0.114481	0.0340932
chr17	1528465	cg16061354	SLC43A2	-0.195433	0.0340973
chr6	29573014	cg26718763	GABBR1	-0.10193	0.0341453
chr4	1742463	cg08947915	TACC3	-0.126414	0.0341689
chr9	125797187	cg14584535	GPR21	-0.173868	0.034215
chr18	6898679	cg18863203	ARHGAP28	-0.104296	0.0342736
chr1	186175774	cg23208294	MIR548F1	-0.104669	0.0343325
chr12	11002403	cg23256579	PRR4	-0.105278	0.0343325
chr10	85985319	cg06835074	LRIT2	-0.110252	0.0343526
chr10	18898790	cg21381525	NSUN6	-0.102765	0.034372
chr2	69273285	cg07319199	ANTXR1	-0.292067	0.0343833
chr11	58728533	cg04092111		-0.118848	0.0344123
chr6	41584037	cg13408528		-0.12518	0.0344444
chr9	136150032	cg22535403	ABO	0.133683	0.0344664
chr4	169480345	cg16373817	PALLD	-0.210467	0.0344664
chr1	120258412	cg04857033	PHGDH	-0.129428	0.0345367
chr10	95661	cg09677976	TUBB8	-0.113053	0.0345925
chr10	133558893	cg20568497		-0.119628	0.0347057
chr7	100880751	cg02512860	CLDN15	-0.100014	0.0347131
chr20	35062903	cg02209770	DLGAP4	-0.119733	0.0347571
chr17	2648524	cg06064115		-0.117046	0.0348033
chr17	61042803	cg21380024		0.140852	0.0348185
chr2	237033583	cg14903799	AGAP1	-0.122381	0.0348185
chr11	91950460	cg20506843		-0.104619	0.0348541
chr15	51501301	cg16122750	CYP19A1	-0.101962	0.0349122
chr10	127586463	cg14585288	FANK1	-0.108945	0.0349135
chr19	53454761	cg24044776	ZNF816A	-0.121417	0.0349948
chr11	113604277	cg04690319	ZW10	-0.11146	0.035002
chr21	39871301	cg17228105	ERG	-0.12961	0.0350051
chr3	10203470	cg10699312		-0.112186	0.0351015
chr1	201902050	cg04922763	LMOD1	-0.105169	0.0351035
chr6	25995630	cg07487112		-0.110117	0.0351044
chr1	68212170	cg23232299	GNG12	-0.116999	0.035174
chr10	30659144	cg08966768	LOC729668	-0.131018	0.035184
chr1	208037215	cg06899483		-0.108033	0.035211
chr6	21762391	cg25420132	FLJ22536	-0.103697	0.0352157
chr5	23507594	cg07011961	PRDM9	-0.123499	0.0352215
chr13	22613841	cg12852407		-0.126625	0.0352387
chr1	27945005	cg20485084	FGR	-0.179833	0.0352546
chr4	8527460	cg08786370		-0.174721	0.0352679
chr20	42142995	cg22601123	L3MBTL	-0.114699	0.0353286
chr7	120428329	cg15550972	TSPAN12	-0.102063	0.035364
chr4	69187090	cg13341941	YTHDC1	-0.140815	0.0354106
chr3	44763977	cg15584792	ZNF502	-0.115473	0.0354437
chr2	192873531	cg22354905	TMEFF2	-0.100314	0.0354839
chr7	21070977	cg10617782		-0.104421	0.0354839
chr3	45160270	cg24840062	CDCP1	-0.147485	0.0354939
chr19	43085416	cg19399653	CEACAM8	-0.133104	0.0355005
chr2	54828502	cg21487856	SPTBN1	-0.135271	0.0355039
chr7	12410026	cg23238719	VWDE	-0.104937	0.0355053
chr17	71241372	cg19933343	C17orf80	-0.116748	0.0355307
chr3	194115840	cg03492634	GP5	-0.173522	0.0355387
chr7	747392	cg11448166	PRKAR1B	-0.106801	0.0355439
chr9	140166114	cg01099825	COBRA1	-0.151907	0.0355503
chr7	5527927	cg05711036	FBXL18	-0.136367	0.0355627
chr6	29978621	cg13469777	NCRNA00171	-0.115424	0.0355829
chr6	17598072	cg09784070		-0.101509	0.0355965
chr5	32584912	cg18721397	SUB1	0.134004	0.0356754
chr6	109010960	cg26575105		-0.102264	0.0356877
chr13	114877260	cg02648589	RASA3	-0.134725	0.0356877
chr8	122639115	cg20146177	HAS2	-0.146885	0.0356877
chr20	62085737	cg02334195	KCNQ2	-0.109517	0.0356983
chr9	110479859	cg14142087		-0.101067	0.0357599
chr3	142361468	cg19865412	PLS1	-0.121867	0.0357599
chr6	33037640	cg23195763	HLA-DPA1	-0.199194	0.0357599
chr10	112896689	cg26691305		-0.122841	0.035773
chr17	14198392	cg21649089		0.112344	0.0357795
chr2	129396420	cg14708360		-0.116188	0.0357795
chr7	157516767	cg11468861	PTPRN2	-0.116321	0.0357795
chr6	16690986	cg00983705	ATXN1	-0.21766	0.0357795
chr20	304156	cg01822050		-0.194673	0.035811
chr8	232941	cg07890882		-0.106378	0.035888
chr7	2773877	cg15704521	GNA12	-0.138454	0.0359119
chr1	15392852	cg16822407	KIAA1026	-0.109932	0.0359813
chr6	30012620	cg14983466	NCRNA00171	-0.101351	0.0360387
chr8	28562890	cg00328720	EXTL3	-0.101926	0.0360446
chr1	89580443	cg13187849	GBP2	-0.103359	0.0360677
chr3	122605348	cg26462488	LOC100129550	-0.139127	0.0360801
chr1	1229351	cg03003335	ACAP3	0.105514	0.0361808
chr19	37894762	cg14942863		-0.129314	0.0361808
chr1	44707057	cg21148737	ERI3	-0.103886	0.0362066
chr4	40356774	cg07801448	CHRNA9	-0.114618	0.0362238
chr1	1287259	cg21118819		-0.107684	0.0362585
chr10	23381286	cg10226467		-0.132153	0.0362585
chr7	2106404	cg01383401	MAD1L1	-0.108031	0.0362803
chr10	73472315	cg07571519	C10orf105	-0.132787	0.036282
chr11	80492393	cg14962025		-0.109267	0.0363208
chr13	86368096	cg20682236	SLITRK6	-0.123313	0.0363208
chr6	90509463	cg03716245	MDN1	-0.124931	0.0363208
chr6	30286162	cg01598009	HCG18	-0.132854	0.0363729
chr16	8960972	cg07692489	CARHSP1	0.121577	0.0365235
chr9	35036350	cg14328523		-0.118762	0.0365255
chr1	108442921	cg19413693	VAV3	-0.145238	0.0365345
chr12	117184799	cg14912045	RNFT2	-0.16086	0.0365942
chr3	124510673	cg00871980	ITGB5	-0.113741	0.0366042
chr1	239552128	cg09823288		-0.107963	0.0366279
chr12	11898284	cg07986378	ETV6	-0.102118	0.0366487
chr2	119597415	cg01471264		0.105085	0.0366966
chr20	57408795	cg00636769	GNASAS	-0.105216	0.0367664
chr18	57030381	cg26163704		-0.105935	0.0368578
chr16	86714999	cg00622128		-0.111252	0.0368878
chr5	102548823	cg18915170		-0.114448	0.0368878
chr11	127923605	cg04481444		-0.109041	0.0368895
chr5	42924367	cg11206167		-0.135815	0.0369028
chr1	208081541	cg21697512	CD34	-0.113291	0.0369105
chr6	52774462	cg12445586	GSTA3	-0.10729	0.0369977
chr10	73472344	cg24457649	C10orf105	-0.118329	0.0370202
chr1	204452127	cg20828284	PIK3C2B	-0.197098	0.0370828
chr12	52868602	cg07658640	KRT6C	-0.115599	0.0371028
chr11	619004	cg23505890	MUPCDH	-0.117479	0.0371036
chr3	71084634	cg18067134	FOXP1	-0.145218	0.0371138
chr2	157528744	cg00451491		-0.12191	0.0371565
chr7	15651770	cg24398793	MEOX2	-0.297876	0.0371895
chr1	111153602	cg14221700		-0.120268	0.037211
chr4	152097288	cg09786062	SH3D19	-0.12564	0.0372245
chr4	165445207	cg19847436		-0.125623	0.0372791
chr7	643155	cg02217713	PRKAR1B	-0.115064	0.0372847
chr18	21014021	cg15283212	C18orf45	-0.161214	0.0372847
chr4	119796958	cg11165823		-0.10177	0.0373807
chr2	189839015	cg23502162	COL3A1	-0.133466	0.0374065
chr2	59152826	cg05674829		-0.119463	0.0375279
chr2	153364045	cg26204803	FMNL2	-0.103046	0.0375604
chr7	965534	cg03634833	ADAP1	-0.110956	0.0375614
chr8	27692811	cg17795291	PBK	-0.146671	0.0376085
chr12	29542219	cg02376887		-0.103576	0.0376236
chr3	129065510	cg09430738		-0.114982	0.0376325
chr6	102188078	cg24680758	GRIK2	-0.105498	0.0377433
chr16	21677966	cg09186031		-0.109945	0.0377433
chr2	241478837	cg12036829	ANKMY1	-0.11446	0.0377433
chr2	137267702	cg05353292		-0.108695	0.0378043
chr11	49458195	cg09390186		-0.122527	0.0378043
chr22	38032768	cg07265806		-0.147563	0.037866
chr10	98331533	cg03526384	TM9SF3	-0.100913	0.0378946
chr7	5528179	cg05914034	FBXL18	-0.106832	0.0380361
chr10	134724823	cg23693569		-0.126925	0.0380865
chr4	103171630	cg05049822		-0.133059	0.0380985
chr1	19506481	cg24742520	UBR4	-0.148196	0.0381341
chr11	64620859	cg09374353	EHD1	-0.115457	0.0381373
chr1	28572299	cg02251754		-0.135171	0.0381515
chr16	46782760	cg02544453	MYLK3	-0.103835	0.03816
chr1	31234437	cg25310233		-0.124995	0.0381776
chr17	74113667	cg00904580		-0.123482	0.0381957
chr18	3875823	cg25804443	DLGAP1	-0.112392	0.0382502
chr2	157183013	cg16058600	NR4A2	-0.121243	0.0382597
chr2	24735298	cg11532433		-0.13165	0.0382597
chr22	43044387	cg20950843	CYB5R3	0.120078	0.0382617
chr2	75043142	cg13000080		-0.121197	0.0382736
chr5	33455121	cg21803535	TARS	-0.13061	0.0382957
chr11	67014216	cg01265228	KDM2A	-0.111427	0.0383864
chr2	45355494	cg08019044		-0.112897	0.0384691
chr9	101832044	cg14424210	COL15A1	-0.13909	0.0385351
chr19	18700933	cg19492423	C19orf60	0.110088	0.0385622
chr6	28552582	cg27333426	SCAND3	-0.105036	0.0386455
chr15	85173380	cg04284033	SCAND2	-0.121265	0.0387261
chr11	61545348	cg24731731	C11orf9	-0.115283	0.0387332
chr19	52456033	cg17406915		-0.218844	0.0387824
chr11	125555692	cg25122413		-0.103123	0.0387952
chr6	16818211	cg06009329		-0.125619	0.038799
chr9	71834813	cg14805174	TJP2	-0.109792	0.0388106
chr6	18368844	cg14645856		-0.104521	0.0388553
chr7	99819110	cg17830204	GATS	-0.11298	0.0388553
chr17	80730489	cg25134401	TBCD	-0.131401	0.0388553
chr1	61624321	cg19899972	NFIA	-0.146422	0.0388553
chr1	220697615	cg15897635		-0.179439	0.0389201
chr16	81682484	cg07574924	CMIP	-0.100299	0.0389225
chr19	3984058	cg10340117	EEF2	0.102466	0.038924
chr13	74568601	cg10194627	KLF12	-0.113914	0.0389449
chr7	155556729	cg13904214	RBM33	-0.107465	0.0389724
chr17	9806745	cg18976191	RCVRN	-0.128788	0.0389973
chr11	71275784	cg24139912	KRTAP5-10	-0.101511	0.0390213
chr7	157886926	cg24604127	PTPRN2	-0.100229	0.0390603
chr5	55863072	cg08496483		-0.113213	0.0391043
chr1	19532345	cg15070710	UBR4	-0.106126	0.0391205
chr18	45568066	cg23980070	ZBTB7C	-0.13742	0.0392786
chr17	40464780	cg25500196		-0.145893	0.0392786
chr8	817044	cg01971667		-0.157228	0.0392786
chr5	148016798	cg16163558	HTR4	-0.119088	0.0392893
chr7	134653134	cg26710819	CALD1	-0.10146	0.0392898
chr18	264576	cg12944017	THOC1	-0.104879	0.0393162
chr20	42187103	cg04420889	SGK2	-0.104533	0.0393248
chr1	214732040	cg23804607		-0.102144	0.0395386
chr21	31663266	cg11475420	KRTAP25-1	-0.129354	0.0395882
chr21	46087249	cg10849289	KRTAP12-2	-0.122574	0.0396714
chr12	99289499	cg10359944	ANKS1B	-0.106022	0.0397065
chr16	89163578	cg07661835	ACSF3	-0.113596	0.0397861
chr2	206599315	cg05264870	NRP2	-0.147012	0.0397861
chr15	58519704	cg26444806		-0.108479	0.0399181
chr4	27005430	cg14394126	STIM2	-0.132229	0.0399367
chr1	198286611	cg20297873	NEK7	-0.110028	0.0399827
chr7	37004390	cg01579884	ELMO1	-0.106357	0.0399829
chr14	20926227	cg04928930	TMEM55B	-0.123046	0.0399873
chr17	48356195	cg25649895	TMEM92	-0.10359	0.0400123
chr5	41922931	cg12807013		-0.115516	0.0400531
chr12	49526778	cg14483935	TUBA1B	-0.115434	0.0401514
chr17	73056187	cg26475911	KCTD2	-0.100661	0.0401785
chr11	126042395	cg11692577		-0.104413	0.0401785
chr1	18704828	cg08937639	IGSF21	-0.152334	0.0401989
chr5	58364671	cg25480082	PDE4D	-0.108392	0.0402094
chr21	38444223	cg21832243	TTC3	0.14111	0.0402103
chr6	28545895	cg01605921	SCAND3	-0.107287	0.040213
chr10	33371435	cg15444831		-0.118	0.0402416
chr2	242693323	cg05385718	D2HGDH	-0.238029	0.0402826
chr7	81240257	cg17256697		-0.110458	0.0403216
chr12	52404161	cg06611426	GRASP	-0.109911	0.0403517
chr10	71892787	cg01322555	AIFM2	-0.111819	0.0403517
chr7	116200522	cg05917273	CAV1	0.186175	0.0403715
chr1	150703141	cg26891210	CTSS	-0.183398	0.0404657
chr4	74921425	cg12684958	PPBPL2	-0.112492	0.0404873
chr3	119063744	cg20865740	CDGAP	-0.10162	0.0404892
chr8	142179908	cg15891546	DENND3	-0.136165	0.0405212
chr12	117013755	cg12078937	MAP1LC3B2	-0.129093	0.0405514
chr17	14212064	cg12052658	HS3ST3B1	-0.101691	0.0406123
chr4	3527090	cg16700004	LRPAP1	-0.119606	0.0406123
chr15	74266972	cg15805998		-0.10138	0.0406141
chr15	48048618	cg06235645	SEMA6D	-0.103692	0.0406355
chr13	26628537	cg04838225		-0.102114	0.0406508
chr2	102392841	cg23813732	MAP4K4	-0.112559	0.0406559
chr7	77044158	cg19348272	PION	0.155958	0.0406608
chr17	76129984	cg22833809	TMC8	-0.104322	0.0407012
chr7	799693	cg11027456	HEATR2	-0.115304	0.0407661
chr21	40756696	cg07777652	WRB	-0.106466	0.0407669
chr6	25761690	cg09750510	SLC17A4	-0.102251	0.0407685
chr5	170883817	cg25085969	FGF18	-0.109808	0.0408141
chr6	100868626	cg13345255	SIM1	-0.114989	0.0408717
chr7	16462463	cg16634737		-0.302627	0.0408883
chr1	212841257	cg24486958		0.145183	0.0409125
chr7	5527669	cg01653727	FBXL18	-0.111287	0.0411469
chr1	165853483	cg14257907	UCK2	-0.163416	0.0411707
chr7	27160960	cg06837799	HOXA3	-0.102955	0.0411873
chr20	44329922	cg22825261	WFDC10B	0.101139	0.0412379
chr1	234042342	cg04919681	SLC35F3	-0.118127	0.0412513
chr1	43525160	cg17017394		-0.104363	0.0412773
chr7	65706494	cg10761316	TPST1	-0.108904	0.0413328
chr12	101868351	cg09667806		-0.107774	0.0414156
chr15	35238599	cg16267577	AQR	-0.103652	0.0414575
chr14	53254659	cg18214930	GNPNAT1	-0.130639	0.0414817
chr6	30295772	cg08276565	HCG18	-0.111671	0.0414918
chr19	54106910	cg03972476	LOC284379	-0.102269	0.0415585
chr1	236017278	cg10376100	LYST	-0.112453	0.041616
chr4	89063326	cg15443907	ABCG2	-0.101452	0.0417235
chr4	146031291	cg26690672	ABCE1	-0.142613	0.0417235
chr2	134948022	cg00338529		-0.103442	0.0417775
chr13	32921647	cg03777697	BRCA2	-0.115783	0.0418466
chr2	927811	cg12155443		-0.134446	0.0418823
chr4	48390346	cg05872234	SLAIN2	-0.105581	0.0418916
chr8	105502059	cg16465559	LRP12	-0.111779	0.0419843
chr10	76614628	cg24243879	MYST4	-0.132521	0.0419868
chr6	32491826	cg13318793	HLA-DRB5	-0.134052	0.0420416
chr15	83409972	cg11749543		-0.100954	0.0421312
chr10	32403029	cg22534759		-0.110318	0.0421904
chr17	70124422	cg16014725		-0.104361	0.0422047
chr17	75471203	cg15229994	2022-09-09	-0.149627	0.0422047
chr11	8931473	cg09997546	C11orf17	0.126007	0.0422851
chr15	55665236	cg09672452	CCPG1	-0.109555	0.0422851
chr7	25946223	cg07953845		-0.1104	0.042368
chr19	50249584	cg26744682	TSKS	0.107427	0.0423912
chr14	79982284	cg15434778	NRXN3	-0.101435	0.0424212
chr11	71313750	cg25801502		-0.133083	0.0424514
chr18	76674571	cg16189953		-0.100979	0.0424633
chr15	77460576	cg02190897	SGK269	-0.12194	0.0424633
chr4	103998289	cg01422467	NHEDC2	-0.109843	0.0425407
chr15	22546908	cg15335669		-0.123437	0.0425611
chr6	150286838	cg00126498	ULBP1	-0.135749	0.0425682
chr6	13295561	cg26514623		-0.144052	0.0425755
chr1	22844900	cg02668903	ZBTB40	-0.146601	0.0425967
chr2	233469404	cg12284971	EFHD1	-0.175325	0.0426068
chr15	89047486	cg13845952		-0.100857	0.0427352
chr9	93877009	cg13530528		-0.120937	0.0427363
chr1	109553055	cg27567953	WDR47	-0.100457	0.0427439
chr19	14177790	cg10754600		-0.131861	0.0427599
chr5	161178841	cg04670031		-0.104211	0.0427786
chr20	51648147	cg09566894	TSHZ2	-0.100115	0.0427801
chr4	113485177	cg08665844	C4orf21	-0.1703	0.0427847
chr11	61733475	cg24803614	FTH1	0.114996	0.0427865
chr10	62537212	cg08290728	CDK1	-0.128309	0.0428224
chr13	36273490	cg06531158	MIR548F5	-0.118563	0.0428371
chr3	32567949	cg21842660	DYNC1LI1	-0.119637	0.0428487
chr1	22431609	cg10895682		-0.142132	0.0428487
chr13	47240378	cg04092803	LRCH1	-0.104353	0.042929
chr1	76547234	cg25312440	ST6GALNAC3	-0.112221	0.0429384
chr6	128374435	cg14065008	PTPRK	-0.106428	0.0429762
chr1	15392793	cg13322252	KIAA1026	-0.107405	0.0429948
chr5	53179148	cg21932878		-0.121938	0.042995
chr17	78735550	cg06412669	RPTOR	-0.150816	0.0431134
chr7	5735123	cg21637392	RNF216	-0.137978	0.0431139
chr2	826591	cg26476630		-0.100392	0.0431269
chr2	237921310	cg26236972		-0.126267	0.0431269
chr8	77616126	cg16495873	ZFHX4	-0.102761	0.0431543
chr3	177877649	cg20176098		-0.10886	0.0431543
chr3	48556323	cg21141812	PFKFB4	-0.112147	0.0432008
chr3	71355161	cg20506347	FOXP1	-0.164803	0.0432073
chr10	126845714	cg27488007	CTBP2	-0.128995	0.0432087
chr5	53555964	cg26369444	ARL15	-0.124755	0.0432393
chr19	51053653	cg08280044	LRRC4B	-0.102334	0.0432553
chr17	47092072	cg10950924	IGF2BP1	-0.117325	0.0432655
chr12	124121050	cg12017810	GTF2H3	-0.104565	0.0432685
chr12	111165713	cg20547015	PPP1CC	-0.120862	0.0432998
chr6	42408281	cg25155298	TRERF1	-0.124221	0.0433435
chr10	3373770	cg23494338		-0.111342	0.0434032
chr6	35654363	cg03546163	FKBP5	-0.128959	0.0434079
chr2	182171470	cg03223172		-0.188798	0.0434553
chr17	1979495	cg12789448	SMG6	-0.147323	0.0435163
chr2	70437536	cg05939956	TIA1	-0.112641	0.0435238
chr16	1630430	cg06363243	IFT140	-0.101285	0.0435374
chr6	151616194	cg12279999	AKAP12	-0.108477	0.0435374
chr17	27459835	cg22688566	MYO18A	-0.110695	0.0435374
chr16	15135397	cg26985681	NTAN1	-0.111209	0.0435374
chr10	25620462	cg01006048	GPR158	-0.167562	0.0435374
chr18	77905408	cg19774868	LOC100130522	-0.107703	0.0436071
chr16	46651918	cg03266048	SHCBP1	-0.109669	0.0436379
chr2	116678544	cg10510032		-0.117085	0.0436476
chr18	7563847	cg01216388		-0.107377	0.0436689
chr3	71600114	cg18267131	FOXP1	-0.120386	0.0437581
chr7	2563816	cg03676485	LFNG	0.116177	0.0437706
chr5	178220967	cg12488586		-0.105963	0.0438255
chr6	30696003	cg04219001	FLOT1	0.156344	0.0438732
chr7	132677298	cg08757624	CHCHD3	-0.139742	0.0438795
chr2	233703120	cg21993290	GIGYF2	-0.110991	0.0439107
chr1	182921851	cg02710296	C1orf14	0.11294	0.0439208
chr4	1742301	cg13673960	TACC3	-0.107252	0.0440369
chr1	231512676	cg18815120	EGLN1	-0.143332	0.0440402
chr10	118082519	cg06640662	C10orf96	-0.12907	0.0441577
chr5	170921824	cg19613915		-0.148486	0.0441763
chr19	51505779	cg26651782	KLK9	-0.114469	0.0441845
chr2	239565255	cg14795227		-0.115807	0.0441905
chr2	70518230	cg24762021	SNRPG	-0.121717	0.044225
chr17	78865373	cg03502601	RPTOR	-0.114993	0.0442557
chr12	47052349	cg21546022		-0.115178	0.0443608
chr8	50837079	cg18219713	SNTG1	-0.102711	0.0443731
chr11	13983705	cg08309747	SPON1	-0.103653	0.0444038
chr4	1535673	cg08954277		-0.125509	0.0444106
chr2	240241154	cg07673080	HDAC4	0.129596	0.0444987
chr6	170554002	cg11109139		-0.157146	0.0445051
chr19	8402642	cg18457110	KANK3	-0.110699	0.0445234
chr17	5083868	cg11221687	ZNF594	-0.148605	0.0445662
chr14	75716369	cg01013171		-0.135955	0.0445709
chr16	89163800	cg02691035	ACSF3	-0.115255	0.04459
chr10	44159566	cg02722330		-0.10777	0.0445971
chr15	27215457	cg08920810	GABRG3	-0.114133	0.0446005
chr3	10192045	cg15036157	VHL	-0.156425	0.0446883
chr8	128388831	cg15704662		-0.105654	0.044808
chr14	25104483	cg11025037	GZMB	-0.117732	0.044808
chr15	22560713	cg02759635		-0.111766	0.0448314
chr8	68341055	cg16536560	CPA6	-0.135612	0.0448741
chr2	207803547	cg17600943	CPO	-0.218867	0.0448946
chr22	49843259	cg15245556		0.100076	0.0448951
chr4	70626128	cg16414852	SULT1B1	-0.118223	0.0449002
chr2	207958145	cg14661803	KLF7	-0.10825	0.0449502
chr4	43758625	cg10000195		-0.108434	0.0449524
chr11	50226789	cg24259560		-0.111699	0.0449866
chr4	1523326	cg04300684		0.101928	0.0450357
chr5	20611422	cg03314137		-0.103553	0.0450367
chr11	3396237	cg18030105	ZNF195	-0.134369	0.0451998
chr2	65528222	cg07310500		-0.113065	0.0452082
chr3	93773657	cg00338852	ARL13B	-0.107391	0.0452718
chr17	26871676	cg06872115		-0.127179	0.0452888
chr22	24549738	cg17009616	CABIN1	-0.130262	0.0453168
chr12	125023115	cg01612883		-0.142463	0.0453368
chr4	120605519	cg01736133		-0.173612	0.0453368
chr5	79781376	cg01238140		-0.110459	0.0453473
chr16	29179176	cg05275182		-0.135238	0.0453771
chr10	81788379	cg24132606		-0.107829	0.0454773
chr6	33358798	cg25474873	KIFC1	-0.124679	0.0455347
chr1	101493828	cg05376756		-0.192367	0.0455983
chr1	216805707	cg13242895	ESRRG	-0.15471	0.0456092
chr12	6662581	cg12024104	IFFO1	-0.108234	0.0456139
chr1	205821442	cg24739457		-0.121983	0.0456241
chr7	27138974	cg08657654		-0.105679	0.0456603
chr1	46766431	cg22228439	LRRC41	-0.135964	0.0456603
chr12	114395548	cg19191272	RBM19	-0.116773	0.0456623
chr7	2152625	cg15309361	MAD1L1	-0.121308	0.0457237
chr5	75966681	cg22581187	IQGAP2	-0.108884	0.0457432
chr6	111888446	cg26379258	TRAF3IP2	-0.14977	0.0458286
chr4	4172379	cg25076678		-0.12507	0.0458317
chr13	51466941	cg09081997		0.136162	0.0458518
chr5	81847536	cg11845549		-0.116244	0.0458518
chr3	16550461	cg04381957	RFTN1	-0.105207	0.0458791
chr18	12672632	cg18401262	CEP76	-0.125594	0.0458791
chr2	1618060	cg05035470		-0.103124	0.045894
chr12	10096794	cg17349760		-0.13633	0.0458995
chr5	40756846	cg15528722	TTC33	-0.111542	0.0459333
chr5	139064216	cg07879474		0.113673	0.0459379
chr5	1107192	cg08830157	SLC12A7	-0.126877	0.045999
chr7	92460784	cg19103429	CDK6	-0.119082	0.0460361
chr17	65688720	cg02641420	PITPNC1	-0.109087	0.0460377
chr7	155556652	cg14430943	RBM33	-0.151963	0.0460442
chr5	169373347	cg22809017	FAM196B	-0.105404	0.0460691
chr12	57783795	cg21503345		-0.117056	0.0460711
chr8	145955983	cg00117018	ZNF251	-0.146701	0.0461266
chr1	224564870	cg15595502		-0.153888	0.0461266
chr2	31806898	cg22549881	SRD5A2	-0.108553	0.0462596
chr7	158905015	cg05554000	VIPR2	-0.155905	0.0462659
chr1	3567119	cg18021902	WDR8	0.100863	0.0462952
chr10	73496014	cg05979232	C10orf105	-0.120334	0.0462952
chr8	144638852	cg15172061	GSDMD	-0.110562	0.0463342
chr12	49526897	cg01656996		-0.108106	0.0464144
chr21	33957846	cg15713719	TCP10L	-0.132822	0.0464287
chr5	5326225	cg23268102		-0.107269	0.046465
chr3	153964763	cg03608828	SGEF	-0.134989	0.0464909
chr5	75975285	cg06758539	IQGAP2	-0.12753	0.0465378
chr4	169935001	cg00329052		-0.107883	0.046598
chr4	1957864	cg22472154	WHSC1	-0.114359	0.046598
chr1	205193809	cg00176657		-0.116121	0.0466216
chr6	29442830	cg10619365		-0.163145	0.0466767
chr3	186617939	cg15034757		-0.127588	0.0466918
chr3	160122503	cg09100593	SMC4	-0.112291	0.0468678
chr3	29227007	cg17687451		-0.100688	0.0468717
chr20	3596496	cg19039841	ATRN	-0.108662	0.0469106
chr11	64621386	cg15678817	EHD1	-0.133461	0.0469526
chr7	140556696	cg12750675	BRAF	-0.100136	0.0470049
chr10	133156155	cg19256291		-0.107914	0.0470229
chr13	114111864	cg25082361	DCUN1D2	-0.112537	0.0472332
chr10	68858663	cg08617354	CTNNA3	-0.106932	0.0473493
chr7	18043678	cg25046563		-0.118006	0.0473603
chr17	1373774	cg05978306	MYO1C	-0.135117	0.047361
chr12	96115707	cg22349229	NTN4	-0.12493	0.0474217
chr10	89453226	cg03166508	PAPSS2	-0.119276	0.0475507
chr2	219537816	cg04430204	STK36	-0.102727	0.0475792
chr15	26045681	cg20117103	ATP10A	-0.122385	0.0476022
chr3	43515832	cg11168423	ANO10	-0.109863	0.0476406
chr17	39603398	cg10214287		-0.101741	0.0476577
chr6	125239911	cg10429523	STL	-0.101674	0.0476628
chr5	76921025	cg15382620		-0.110502	0.0476628
chr8	105598224	cg11091914	LRP12	-0.180263	0.0476671
chr3	132182603	cg09837559	DNAJC13	-0.10427	0.0478441
chr15	102111567	cg25982066		-0.102629	0.0479316
chr6	116896528	cg23280258	RWDD1	-0.110819	0.0479326
chr10	73516760	cg04179740	CDH23	-0.166536	0.047964
chr12	72071095	cg23258033	THAP2	-0.10384	0.0480105
chr4	3315925	cg24466927	RGS12	-0.160529	0.0481006
chr1	1261347	cg06520508	GLTPD1	-0.159274	0.0481245
chr12	131002918	cg24272907	RIMBP2	-0.104783	0.0481751
chr6	32449961	cg13081526		-0.186018	0.0482101
chr3	22410416	cg00697290		-0.108187	0.0482285
chr1	167059365	cg06665322	GPA33	0.121915	0.048231
chr11	60534991	cg03378197	MS4A15	-0.100736	0.0482441
chr11	94902460	cg08209365		-0.123532	0.0482926
chr16	787799	cg10179297	NARFL	-0.149945	0.0484814
chr20	54975754	cg18918007	CSTF1	-0.117427	0.0484998
chr6	16504474	cg06811300	ATXN1	-0.1263	0.048503
chr5	65275261	cg26149108	ERBB2IP	-0.110714	0.0485105
chr8	23285320	cg13216124		-0.105424	0.0485418
chr3	138763899	cg14325153	PRR23C	-0.154474	0.0485523
chr6	30519905	cg04349266	GNL1	-0.111905	0.0485962
chr12	48196167	cg20995304	HDAC7	-0.107944	0.0486949
chr6	166778519	cg09426434	BRP44L	-0.11344	0.0486949
chr2	65355269	cg00570635	RAB1A	-0.156353	0.0486951
chr4	183110156	cg20255451		-0.12491	0.048699
chr1	167488503	cg06531517	CD247	-0.105241	0.0487023
chr1	7904830	cg00811891	PER3	-0.114135	0.0487023
chr1	65327523	cg00153395	JAK1	-0.10854	0.0487327
chr8	142183677	cg19991046	DENND3	-0.113379	0.0488118
chr3	129295896	cg15629311	PLXND1	-0.137095	0.0489414
chr1	207460860	cg27511861		-0.108645	0.0489495
chr2	875509	cg10902693		-0.110373	0.0490303
chr7	151253902	cg19367193	PRKAG2	-0.151629	0.0490702
chr1	247094694	cg05760417	AHCTF1	-0.130876	0.0490707
chr15	47624584	cg16425161		-0.105271	0.0491073
chr2	130960303	cg04938780		0.101584	0.0491523
chr19	427263	cg25264268	SHC2	-0.138511	0.049215
chr12	65063890	cg27292835	RASSF3	-0.140081	0.049215
chr3	117307343	cg11022062		-0.111214	0.0492967
chr14	53421044	cg00865927		-0.101045	0.0493513
chr10	104846094	cg27508021	NT5C2	-0.102175	0.0493605
chr17	18023971	cg04398451	MYO15A	-0.117677	0.0493772
chr11	46533685	cg14201699	AMBRA1	-0.102936	0.0494077
chr3	178524908	cg03291996	KCNMB2	-0.118071	0.0494567
chr16	85561302	cg04231085		-0.131034	0.0495474
chr7	134849633	cg07876788	TMEM140	-0.148406	0.0495913
chr12	99640830	cg04798824	ANKS1B	-0.111132	0.0496467
chr10	51576232	cg01315067	NCOA4	0.102953	0.0496533
chr20	62364801	cg04379041	ZGPAT	-0.126342	0.0496949
chr1	146550467	cg02487331		-0.210279	0.0498165
chr5	90075932	cg01963035	GPR98	-0.107062	0.0499184

## Sheet: TableS6_CD3_IGRA.B_DMC
Supplementary Table S6. Differentially methylated CpG sites (DMC) identified in Alveolar T cells for IGRA status with MMD>0.1, FDR< 0.05.
chr	pos	Name	UCSC_RefGene_Name	UCSC_RefGene_Accession	MMD	adj.P.Val
chr6	111984370	cg14482998	FYN	NM_153048;NM_153047;NM_002037	-0.317684	1.07115e-05
chr11	64980819	cg02707152	SLC22A20	NM_001004326	0.106199	5.3103e-05
chr17	66308577	cg13093111	ARSG	NM_014960	-0.227468	0.00214944
chr2	25897613	cg26179134	DTNB	NM_033147;NM_033148;NM_021907;NM_183360;NM_183361	-0.178579	0.00261983
chr20	4721766	cg10152997	PRNT	NR_024268;NR_024267;NR_024269	0.33829	0.00304116
chr10	18434068	cg00177243	CACNB2	NM_201571;NM_201593;NM_201597;NM_201572;NM_201596;NM_001167945	0.164428	0.00515923
chr5	150689593	cg08272429			-0.463086	0.00515923
chr6	12881417	cg27365342	PHACTR1	NM_030948	-0.10494	0.00515923
chr5	1108891	cg05819249	SLC12A7	NM_006598	-0.150802	0.00515923
chr2	211340637	cg13257412	LANCL1	NM_001136574;NM_006055;NM_001136575	0.118037	0.00515923
chr2	173539621	cg26817877			-0.132696	0.00515923
chr7	6653510	cg08693140			0.520033	0.00515923
chr12	99815844	cg11748730	ANKS1B	NM_152788	-0.106242	0.00515923
chr3	129116393	cg00244920	RPL32P3	NR_003111;NR_002992	0.131452	0.00515923
chr1	47068636	cg02289754	MKNK1	NR_024174;NR_024176;NM_001135553;NM_003684;NM_198973	-0.132393	0.00515923
chr6	30860136	cg07979747	DDR1	NM_013993;NM_001954;NM_013994	-0.12365	0.00600997
chr12	54779077	cg09676376	ZNF385A	NM_001130968;NM_001130967;NM_015481	-0.140838	0.0060903
chr19	34971543	cg11374335	WTIP	NM_001080436	-0.10372	0.0060903
chr7	4784174	cg06287775	FOXK1	NM_001037165	0.124423	0.00663806
chr11	7597814	cg04363470	PPFIBP2	NM_003621	0.102937	0.00663806
chr6	138718522	cg26576978			-0.360489	0.00663806
chr7	1596050	cg00411097	TMEM184A	NM_001097620;NM_001097620	0.123015	0.00679549
chr11	68138505	cg10420527	LRP5	NM_002335	-0.129889	0.00688776
chr20	55041057	cg14929076			-0.147135	0.00771628
chr17	48389080	cg05162320			0.102161	0.00795304
chr3	50396252	cg10133500	TMEM115	NM_007024	0.103685	0.00795304
chr6	15575773	cg02830023	DTNBP1	NM_183041;NM_183040;NM_032122	-0.169373	0.00796601
chr7	1596136	cg21368161	TMEM184A	NM_001097620	0.113153	0.00796601
chr7	1596118	cg12503394	TMEM184A	NM_001097620	0.144195	0.00815026
chr11	1891050	cg03286387	LSP1	NM_001013253;NM_001013254;NM_001013255;NM_002339	0.13388	0.0086747
chr1	248855364	cg08121453			-0.122135	0.00891489
chr7	38351468	cg24735210			-0.111958	0.00892229
chr12	31799118	cg19560014	C12orf72	NM_001135864	-0.149212	0.00950923
chr13	108867134	cg21306988	LIG4	NM_206937;NM_002312;NM_001098268	0.184292	0.00978227
chr15	73074210	cg14597545	ADPGK	NR_023319;NR_023318;NM_031284	-0.172042	0.00980359
chr18	77746937	cg16759783	TXNL4A	NM_006701	0.108652	0.0104486
chr22	39712730	cg25386611	RPL3	NM_000967;NR_000027;NM_001033853	0.12462	0.010517
chr8	18245225	cg23630442			-0.101002	0.0109799
chr14	93475974	cg18416503	ITPK1	NM_001142593;NM_014216;NM_001142594	-0.234317	0.0109799
chr6	47624117	cg06386482	GPR111	NM_153839	0.263255	0.0109799
chr17	39722264	cg19846389	KRT9	NM_000226	0.101683	0.0116717
chr1	61408076	cg07381872			0.135945	0.0117577
chr18	615471	cg13483727	CLUL1	NM_199167;NM_014410	-0.140264	0.0117577
chr19	46029456	cg08425610	VASP	NM_003370	-0.104745	0.0117577
chr4	183729073	cg20639618			-0.221582	0.0117577
chr7	158750417	cg10079374			0.158448	0.0117577
chr1	871441	cg02439789	SAMD11	NM_152486	0.163957	0.0117577
chr10	99448480	cg12724221	AVPI1	NM_021732	-0.166241	0.0117577
chr6	33096312	cg08506353	HLA-DPB2	NR_001435	0.302462	0.0122533
chr12	56236845	cg17865265	MMP19	NM_002429	-0.120762	0.0122533
chr7	101934892	cg22103219	SH2B2	NM_020979	0.106533	0.0122533
chr14	71128147	cg01634544	TTC9	NM_015351	0.136913	0.0122533
chr8	27219512	cg12743031	PTK2B	NM_173175;NM_004103;NM_173174;NM_173176	0.132726	0.0122533
chr13	91807638	cg22797297			-0.280511	0.0122533
chr12	31799116	cg20755748	C12orf72	NM_001135864	-0.136898	0.0122533
chr2	121301738	cg24912902			-0.124523	0.0127966
chr9	45733081	cg10384133			-0.192509	0.0128186
chr2	219079038	cg12884009			-0.153267	0.0128186
chr12	8276718	cg02082571	CLEC4A	NM_194448;NM_016184;NM_194450;NM_194447	-0.129585	0.013019
chr5	176935364	cg23950714	DOK3	NM_024872;NM_001144876;NM_001144875	-0.195633	0.013019
chr5	1394296	cg03988700	SLC6A3	NM_001044	-0.142009	0.013138
chr16	8806663	cg08241330	ABAT	NM_020686;NM_000663	0.142145	0.0135142
chr12	81103680	cg16081457			-0.168973	0.0135142
chr1	173572370	cg16597737	SLC9A11	NM_178527	-0.132292	0.0135142
chr17	1489671	cg03720572	SLC43A2	NM_152346	-0.133619	0.0138908
chr3	46448084	cg18599081	CCRL2	NM_001130910;NM_003965	-0.143786	0.0141488
chr19	58693421	cg08607280	ZNF274	NM_016324;NM_016325;NM_133502	0.138302	0.0145578
chr7	50343298	cg01139861	IKZF1	NM_006060	0.114165	0.0145578
chr16	8806690	cg08834902	ABAT	NM_020686;NM_000663	0.126686	0.0145884
chr14	95649402	cg03542797	CLMN	NM_024734	-0.183505	0.0145973
chr16	28518331	cg25341726	IL27	NM_145659	-0.167794	0.0145973
chr17	60342517	cg07029460	TBC1D3P2	NR_027486	0.102832	0.0147945
chr1	869368	cg13692836	SAMD11	NM_152486	0.104581	0.0147945
chr8	11756069	cg18041271			-0.19675	0.0149845
chr17	34626096	cg03071134	CCL3L3	NM_001001437;NM_021006	-0.180466	0.0149845
chr22	39919067	cg26460530			0.109261	0.0149845
chr19	50472470	cg22801149	SIGLEC16	NR_002825	-0.137025	0.0149845
chr5	11588971	cg01937840	CTNND2	NM_001332	-0.114655	0.0152057
chr11	62621178	cg18159646	SNORD22	NR_000008;NR_002560;NR_002561;NR_003098	0.120912	0.0152057
chr2	47406858	cg23926598			-0.212121	0.0152057
chr4	57254754	cg12283482	AASDH	NM_181806	0.128148	0.0152057
chr10	97552565	cg03122427	ENTPD1	NM_001164179;NM_001164178;NM_001776;NM_001164183;NM_001164182;NM_001164181;NM_001098175	-0.115733	0.0152057
chr6	106440910	cg17624536			-0.148287	0.0152932
chr20	3145356	cg13598480	ProSAPiP1	NM_014731	-0.127805	0.0154737
chr11	66812262	cg13851621	SYT12	NM_177963	0.101474	0.0155721
chr7	158750384	cg11945929			0.145864	0.0157793
chr14	38071968	cg14041452			-0.102809	0.0157793
chr2	16845587	cg10813980	FAM49A	NM_030797	-0.129065	0.015887
chr5	138611766	cg23205886	SNHG4	NR_003141;NM_199189	0.12031	0.015954
chr11	44578801	cg14780449			-0.127784	0.0159766
chr10	72476178	cg16352527	ADAMTS14	NM_080722;NM_139155	-0.150207	0.0159766
chr1	156217801	cg06882877	PAQR6	NM_024897;NM_198406;NM_024897	0.112977	0.0159766
chr11	7597349	cg20244273	PPFIBP2	NM_003621	0.131691	0.0159766
chr4	119199352	cg17718401	SNORA24	NR_002963;NR_003584	-0.11816	0.0160002
chr16	3306685	cg05554494	MEFV	NM_000243	-0.135165	0.0160002
chr13	108866993	cg03994959	LIG4	NM_002312;NM_002312;NM_206937;NM_001098268	0.112033	0.0160324
chr20	3052274	cg19592472	OXT	NM_000915;NM_000915	-0.140134	0.0160324
chr16	84776329	cg05298510	USP10	NM_005153	-0.16526	0.0160324
chr4	17438618	cg21806669			-0.11292	0.0160324
chr5	158524270	cg00594129	EBF1	NM_024007	0.147282	0.0160324
chr1	2058612	cg09261593	PRKCZ	NM_001033582;NM_002744;NM_001033581	-0.102879	0.0163536
chr2	222320536	cg22888848	EPHA4	NM_004438	-0.130339	0.0167439
chr1	46671850	cg23713600	POMGNT1	NR_024332;NM_001013615	0.177933	0.0169198
chr10	116581112	cg00177239	FAM160B1	NM_020940;NM_001135051	0.146127	0.0169374
chr19	11074303	cg08315613	SMARCA4	NM_003072;NM_001128849;NM_001128844	0.14545	0.0169374
chr17	75096382	cg11186858			-0.190265	0.0169374
chr18	43649078	cg14938561	PSTPIP2	NM_024430	0.128754	0.016975
chr6	30737436	cg25063165			0.111432	0.017201
chr6	17101478	cg02292809			-0.164311	0.0172395
chr14	93652954	cg01655008	C14orf109	NM_001098621;NM_015676	-0.185876	0.0172644
chr11	72448539	cg09010791	ARAP1	NM_001040118	-0.141037	0.0173009
chr5	176937363	cg01278291	DOK3	NM_001144876;NM_024872;NM_001144875;NM_001144876;NM_001144875	-0.100565	0.0173009
chr5	150677867	cg26882525	SLC36A3	NM_001145017;NM_181774	0.43483	0.0173931
chr13	111719172	cg16922763			-0.10845	0.0174064
chr16	25700781	cg01456609			0.102087	0.0174064
chr10	133806677	cg15721134			-0.164468	0.0174064
chr2	130345355	cg19182557			-0.108565	0.0174064
chr21	47851941	cg26697654	PCNT	NM_006031	-0.141514	0.0174532
chr2	209133632	cg19351166	PIKFYVE	NM_152671;NM_015040	-0.128934	0.017567
chr16	8806966	cg04332619	ABAT	NM_020686;NM_000663;NM_000663	0.105414	0.017567
chr15	91447374	cg17017272	MAN2A2	NM_006122	0.103188	0.017567
chr4	83278551	cg12073911	HNRNPD	NM_031370;NM_001003810;NM_002138;NM_031369	0.108694	0.017567
chr6	30860237	cg19148201	DDR1	NM_013993;NM_001954;NM_013994	-0.123309	0.017567
chr21	38362727	cg06167719	HLCS	NM_000411	0.171799	0.017567
chr12	40014292	cg26980789	ABCD2	NM_005164	0.121489	0.0176119
chr4	6729110	cg00146756			0.219884	0.0176119
chr6	16215614	cg10693635			-0.120341	0.0176902
chr1	41446726	cg24141382	CTPS	NM_001905	0.126046	0.017824
chr10	75935875	cg13085507	ADK	NM_006721;NM_001123	0.110035	0.0179882
chr16	12043656	cg03623401			0.106154	0.0182136
chr4	1342394	cg24560729	KIAA1530	NM_020894	-0.112213	0.0182136
chr1	207277450	cg26514552	C4BPA	NM_000715	-0.129672	0.0182329
chr16	4061608	cg27340723	ADCY9	NM_001116	-0.140623	0.0182329
chr1	146515238	cg26810966	LOC728989	NR_024442	0.303672	0.0182329
chr10	73978697	cg03548512	C10orf104	NM_173473	0.106993	0.0182329
chr6	31510735	cg21079591	BAT1	NM_004640;NM_080598	0.118861	0.0182329
chr7	158750607	cg00815399			0.204825	0.0182634
chr5	1295737	cg11625005	TERT	NM_198253;NM_198255	-0.146031	0.018411
chr19	59030102	cg06638023	ZBTB45	NM_032792	0.122309	0.0184536
chr5	140720149	cg05046305	PCDHGA2	NM_032009;NM_018912;NM_018915	0.129392	0.0185673
chr7	32802477	cg11151942			-0.113533	0.0185673
chr8	144358043	cg22857963	GLI4	NM_138465	0.150832	0.0185683
chr5	139562873	cg11953913	C5orf32	NM_032412	-0.160741	0.0188063
chr2	48013473	cg04781916	MSH6	NM_000179	-0.274667	0.0188063
chr6	15428301	cg26405097	JARID2	NM_004973	-0.133881	0.0190322
chr14	98444476	cg16278496	C14orf64	NR_015430	0.215998	0.0191907
chr2	174889929	cg13223682			-0.139379	0.0191907
chr5	1665674	cg05152067			0.102001	0.0192605
chr20	3145359	cg20821980	ProSAPiP1	NM_014731	-0.114188	0.0192605
chr1	39249433	cg26113488			0.148044	0.0192605
chr10	14881628	cg20696451	HSPA14	NM_016299	0.110649	0.0194522
chr18	2659555	cg00700039	SMCHD1	NM_015295	0.12017	0.0194738
chr5	1108876	cg11677852	SLC12A7	NM_006598	-0.182405	0.0198318
chr13	43706545	cg04837597			0.105218	0.0198318
chr17	58499816	cg06752482	C17orf64	NM_181707	-0.109924	0.0199717
chr15	99982524	cg02378208			0.112058	0.0203953
chr19	48231499	cg12489353	EHD2	NM_014601	-0.202066	0.0208064
chr12	108953539	cg20407365	SART3	NM_014706	0.105661	0.0208064
chr2	105757726	cg13149147			-0.120138	0.0208105
chr17	48906982	cg14419435			-0.139904	0.0210861
chr20	57583286	cg04917472	CTSZ	NM_001336	-0.122649	0.0212858
chr17	54236118	cg00475235	ANKFN1	NM_153228	-0.131343	0.0212858
chr6	168766586	cg03023189			-0.103343	0.0212858
chr19	45450501	cg25746394	APOC2	NM_000483	-0.112016	0.0213564
chr7	30635838	cg03068497	GARS	NM_002047	0.143088	0.0213564
chr11	60722107	cg10704729			-0.147146	0.0213564
chr3	108476540	cg05163071	RETNLB	NM_032579	0.131329	0.0213564
chr1	40560154	cg22716190	PPT1	NM_000310;NM_001142604	-0.124633	0.0213564
chr8	94871988	cg07264586			-0.174455	0.0213651
chr1	158148523	cg05046020	CD1D	NM_001766	-0.101904	0.0214632
chr10	104957217	cg17812664			-0.119106	0.0214632
chr2	182656091	cg07835482			0.107334	0.0214833
chr5	15834770	cg19641327	FBXL7	NM_012304	0.108719	0.0214833
chr14	74244236	cg08258506	C14orf43	NM_001043318	0.100708	0.0214833
chr10	97200911	cg11028075	SORBS1	NM_001034957;NM_001034954;NM_001034956;NM_024991;NM_001034956;NM_001034957;NM_006434;NM_006434;NM_015385;NM_001034955;NM_001034954;NM_001034955	0.111618	0.0214833
chr16	85947219	cg02549595	IRF8	NM_002163	-0.135933	0.0214833
chr20	62687969	cg10759927	TCEA2	NM_198723	-0.121661	0.0215107
chr10	99081496	cg23016776	FRAT1	NM_005479;NM_005479	-0.120837	0.0217063
chr11	133658009	cg11395954			0.133237	0.0217063
chr8	124788969	cg20283107	FAM91A1	NM_144963	-0.111603	0.0217063
chr16	2570283	cg26921482	AMDHD2	NM_001145815;NM_015944	-0.147582	0.0217063
chr13	112214112	cg04438098			0.141367	0.0217063
chr6	5724114	cg15296299	FARS2	NM_006567	-0.179364	0.0217063
chr5	149568192	cg14778922	SLC6A7	NM_014228	0.193443	0.0217063
chr6	169026928	cg26505935	SMOC2	NM_022138;NM_001166412	-0.116754	0.0217063
chr19	40972683	cg17847861	SPTBN4	NM_020971;NM_000713	0.103606	0.0217063
chr12	105143826	cg20883723	CHST11	NM_018413	-0.133841	0.0217063
chr13	111719003	cg17121140			-0.122788	0.0217063
chr2	218989983	cg25941354	CXCR2	NM_001557;NM_001168298	-0.104008	0.0217063
chr6	29928362	cg07507446			-0.112921	0.0218307
chr3	133191270	cg15486454	BFSP2	NM_003571	-0.130006	0.0220307
chr1	202975221	cg24197477	TMEM183B	NM_001079809;NM_138391	-0.147347	0.0220307
chr2	213400697	cg01965462	ERBB4	NM_005235;NM_001042599	-0.108083	0.0220307
chr19	51628204	cg02412123	SIGLEC9	NM_014441;NM_014441	-0.112604	0.0220307
chr3	21584249	cg19102621	ZNF385D	NM_024697	-0.17591	0.0220307
chr1	56992372	cg11682697	PPAP2B	NM_177414;NM_003713	0.122464	0.0220307
chr5	142187317	cg01204911	ARHGAP26	NM_015071;NM_001135608	-0.153427	0.0220542
chr11	60414767	cg19431051	C11orf64	NR_026946	-0.185576	0.0223652
chr3	99988576	cg15740507	TBC1D23	NM_018309	0.108828	0.0223652
chr15	90355385	cg04857054	ANPEP	NM_001150	0.114547	0.0224574
chr22	50912555	cg15376996	SBF1	NM_002972	0.133198	0.0224663
chr1	152747562	cg13493250	LCE1F	NM_178354	0.101541	0.022513
chr1	153590243	cg08477332	S100A14	NM_020672	0.411529	0.022513
chr7	142655007	cg22208165	KEL	NM_000420	-0.136469	0.022513
chr3	48474184	cg10721942	CCDC51	NM_024661	0.103213	0.022513
chr11	100734094	cg05925497	FLJ32810	NM_152432	0.135535	0.022517
chr5	140586788	cg04646173			0.11102	0.0226374
chr15	102193344	cg01537571	TM2D3	NM_025141;NM_078474	0.199951	0.0226985
chr8	99259528	cg12860109	NIPAL2	NM_024759	-0.12296	0.0227056
chr15	22413307	cg04606582	OR4N3P	NR_028067	-0.339556	0.0227056
chr5	139139105	cg03534031			-0.174661	0.0227056
chr11	2315339	cg09476073			-0.128605	0.0227106
chr13	114129039	cg23514375	DCUN1D2	NM_001014283	-0.13491	0.0227539
chr4	139840467	cg24019078			0.198918	0.022845
chr7	1588319	cg04633141	TMEM184A	NM_001097620	-0.285903	0.0228884
chr14	21491469	cg23288563	NDRG2	NM_016250;NM_201535;NM_201538;NM_201541;NM_201540;NM_201539;NM_201537;NM_201536	-0.124251	0.023084
chr4	146841701	cg14873022	ZNF827	NM_178835	-0.218758	0.0231686
chr1	28502908	cg24354652	PTAFR	NM_000952;NM_001164723;NM_001164721;NM_001164722	-0.115618	0.0231894
chr14	65464312	cg16528585	FNTB	NM_002028	0.133378	0.023308
chr1	210506448	cg19588327	HHAT	NM_018194;NM_001170564;NM_001170580;NM_001170588;NM_001122834;NM_001170587	0.179159	0.0233399
chr3	52310724	cg03435448	WDR82	NM_025222	0.100144	0.0233399
chr16	29196538	cg16803232			-0.131874	0.0235393
chr6	3025064	cg07377178			-0.14538	0.0235393
chr1	161109487	cg08894273			-0.160753	0.0235393
chr8	58056175	cg08677398			-0.129235	0.0235441
chr16	8806569	cg16586594	ABAT	NM_020686;NM_000663	0.168223	0.0235441
chr8	1708526	cg24391279			0.170544	0.0235441
chr20	3052345	cg26955850	OXT	NM_000915	-0.105512	0.0235456
chr6	32165321	cg13185046	NOTCH4	NM_004557	-0.123681	0.0235919
chr6	30860265	cg09810078	DDR1	NM_013993;NM_001954;NM_013994	-0.125328	0.0235919
chr2	47500335	cg09464466			-0.107343	0.0235919
chr4	6710661	cg02311456	MRFAP1L1	NM_203462	0.113612	0.0238269
chr6	41254825	cg09310966	TREM1	NM_018643	-0.1414	0.0238269
chr11	7614420	cg27603015	PPFIBP2	NM_003621	-0.146784	0.0238269
chr5	95115604	cg21162938	RHOBTB3	NM_014899	-0.131078	0.0238724
chr10	1547894	cg03462714	ADARB2	NM_018702	0.114336	0.0239431
chr1	208085455	cg02852407	CD34	NM_001773;NM_001025109	-0.155934	0.0239482
chr3	44375962	cg15501219			-0.141058	0.0240324
chr21	35747081	cg15683970	FAM165B	NM_058182	-0.110702	0.0240324
chr8	142288517	cg25877009			-0.138649	0.0240324
chr12	4398032	cg14834893	CCND2	NM_001759	-0.15969	0.0240324
chr16	1583984	cg00463982	IFT140	NM_014714;NM_024600	-0.128854	0.0240324
chr2	208541770	cg03716125			0.137112	0.0240324
chr14	24164078	cg13526915			0.110739	0.0240324
chr5	148417172	cg01831454	SH3TC2	NM_024577	-0.156949	0.0240324
chr21	30565638	cg03381704	NCRNA00189	NR_027072	-0.172982	0.0240324
chr16	85298355	cg06524668			0.108887	0.0240324
chr6	30696003	cg04219001	FLOT1	NM_005803	0.222281	0.0240324
chr11	122929522	cg05755017	HSPA8	NM_006597;NM_153201	0.106659	0.0240325
chr4	48493420	cg06226630	ZAR1	NM_175619	-0.103701	0.0240453
chr4	48484788	cg19123916	SLC10A4	NM_152679	-0.105294	0.0240613
chr11	126290232	cg15374924			-0.128045	0.0240613
chr16	2203176	cg08958747	RAB26	NM_014353	0.108103	0.0240613
chr7	2764209	cg19346786			0.157136	0.0241382
chr20	57582706	cg13795831	CTSZ	NM_001336	-0.172006	0.0241382
chr17	8301192	cg00011924	RNF222	NM_001146684	0.128904	0.0242669
chr16	30614413	cg09712234			-0.107517	0.0242669
chr2	173539091	cg06468108			-0.157523	0.0242669
chr17	76151124	cg24766229	C17orf99	NM_001163075	-0.116268	0.0244927
chr7	971130	cg18332229	ADAP1	NM_006869	-0.204677	0.0245619
chr7	63029487	cg12038583			0.132942	0.0245619
chr6	32629920	cg10989981	HLA-DQB1	NM_002123	0.194153	0.0245619
chr2	11925153	cg15614119	LPIN1	NM_145693	0.117469	0.0245619
chr1	871308	cg10146935	SAMD11	NM_152486	0.137718	0.0246673
chr11	69264296	cg08885142			-0.13236	0.0246673
chr4	41936852	cg14906103	TMEM33	NM_018126	-0.124012	0.0246673
chr17	47329321	cg27016107			-0.10972	0.0246673
chr17	58499854	cg17628249	C17orf64	NM_181707	-0.130212	0.0246673
chr14	90087792	cg02916283			0.117816	0.0246673
chr1	3382565	cg15015996	ARHGEF16	NM_014448	0.111146	0.0246673
chr2	233765872	cg05935827	NGEF	NM_019850;NM_001114090	-0.115514	0.0246673
chr12	14720938	cg07634645	PLBD1	NM_024829	-0.100296	0.0246673
chr17	80545434	cg15349696	FOXK2	NM_004514	-0.141405	0.0246673
chr6	28874754	cg02639080	TRIM27	NM_006510	-0.144636	0.0246727
chr1	1355235	cg00060374	LOC441869	NR_026871;NM_001145210	0.142631	0.0246727
chr4	26152723	cg03002688			-0.13084	0.0246727
chr1	8143891	cg19274341			-0.101778	0.0247518
chr1	39570175	cg08456420	MACF1	NM_012090	-0.113949	0.0247518
chr11	8290939	cg01434559			-0.100145	0.0247518
chr3	70882921	cg03171795			-0.163227	0.0247518
chr9	98862825	cg14508093			-0.133209	0.0247955
chr3	159646501	cg00975624			-0.154952	0.0248059
chr14	98444533	cg00034769	C14orf64	NR_015430	0.11652	0.0248767
chr2	121301692	cg19448478			-0.115959	0.0250168
chr17	40128637	cg03593057	DNAJC7	NM_001144766;NR_029431;NM_033133;NM_003315	0.101475	0.0250989
chr12	7282186	cg26338867	CLSTN3	NM_014718;NM_031491	0.122535	0.0250989
chr5	176432570	cg05548190	UIMC1	NM_016290	0.101968	0.0251527
chr8	145063362	cg07980830	GRINA	NM_000837;NM_001009184	-0.109758	0.0251527
chr3	350503	cg25188006	CHL1	NM_006614	-0.110042	0.0251527
chr17	80279310	cg26312191	SECTM1	NM_003004	0.111244	0.0251527
chr2	16804409	cg07091529	FAM49A	NM_030797	-0.125978	0.0251527
chr3	171894094	cg09357350	FNDC3B	NM_001135095;NM_022763	-0.185208	0.0251527
chr2	150177134	cg14379965			-0.123889	0.0251527
chr20	3052221	cg13285174	OXT	NM_000915	-0.125969	0.0251527
chr2	242702553	cg06022561	D2HGDH	NM_152783	0.146652	0.0251729
chr3	56810151	cg12325605	ARHGEF3	NM_001128615;NM_019555;NM_001128616	-0.132334	0.0254255
chr16	87521410	cg08684477	ZCCHC14	NM_015144	-0.111958	0.0255604
chr7	4729610	cg15256491	FOXK1	NM_001037165	0.112936	0.0256123
chr12	20365720	cg23655651			-0.165824	0.0256123
chr6	16413624	cg11291305	ATXN1	NM_001128164;NM_000332	0.203188	0.0256471
chr8	116231420	cg11888982			0.117524	0.0256471
chr17	42145043	cg16674514	LSM12	NM_152344	-0.165595	0.0256471
chr16	420108	cg00101154	MRPL28	NM_006428	0.229424	0.0256471
chr9	140515874	cg13478757	EHMT1	NM_024757;NM_001145527	-0.227749	0.0256471
chr11	58980377	cg26340740	MPEG1	NM_001039396;NM_001039396	-0.14484	0.0256966
chr12	38447636	cg23668907			-0.12277	0.0256966
chr9	77116084	cg13939185	RORB	NM_006914	-0.111139	0.0258096
chr6	33129060	cg05146888			0.120488	0.0258096
chr16	72992580	cg08080174	ZFHX3	NM_006885;NM_001164766	-0.122809	0.0258096
chr8	1708438	cg16222326			0.133336	0.0259927
chr3	3151795	cg25381017	IL5RA	NM_175727;NM_000564;NM_175724;NM_175726;NM_175725;NM_000564;NM_175728;NM_175727;NM_175725;NM_175726;NM_175728;NM_175724	0.108634	0.0260034
chr4	77131705	cg13870520	SCARB2	NM_005506	-0.174137	0.0260034
chr7	105457070	cg17242362	ATXN7L1	NM_152749;NM_020725	-0.118827	0.0260385
chr7	50849168	cg03104936	GRB10	NM_001001555	0.142426	0.0260385
chr17	4065983	cg24516497			-0.100998	0.0260418
chr8	23557486	cg10635443			-0.134935	0.0260418
chr6	133138210	cg27618792	RPS12	NM_001016;NR_002436	0.104076	0.0262368
chr20	39765163	cg18347630	PLCG1	NM_002660;NM_182811	-0.10534	0.026334
chr4	3374909	cg22655196	RGS12	NM_198229;NM_198227;NM_002926	-0.119892	0.0263611
chr1	161185061	cg24465943	FCER1G	NM_004106	-0.108964	0.0263611
chr10	101290029	cg00158122			-0.130449	0.0263611
chr17	58499720	cg21122199	C17orf64	NM_181707	-0.12875	0.0263611
chr17	943342	cg05648510	ABR	NM_021962;NM_001092;NM_001159746	-0.202942	0.0263663
chr11	73729854	cg25941075			-0.138829	0.0265029
chr17	75273896	cg08858426			-0.12606	0.0267196
chr8	144408588	cg03922423	TOP1MT	NM_052963	-0.168692	0.0268845
chr3	171261809	cg13303534			-0.15204	0.0268875
chr7	158750244	cg12954512			0.186032	0.0268954
chr6	31554263	cg04836028	LST1	NR_029461;NM_205837;NM_007161;NM_205840;NM_205839;NM_001166538;NM_205838;NR_029462	-0.100443	0.0268954
chr15	69760994	cg18477949			0.120218	0.0269292
chr10	75533431	cg19442545	FUT11	NM_173540	0.111153	0.0269292
chr10	19002068	cg26925980			0.109658	0.0270896
chr1	68237761	cg03991309	GNG12	NM_018841	0.109811	0.0271466
chr20	21688203	cg01446894	PAX1	NM_006192	-0.114786	0.0271468
chr7	30635889	cg16875104	GARS	NM_002047	0.123179	0.0271468
chr11	72983405	cg04099543	P2RY6	NM_176797;NM_004154;NM_176796;NM_004154;NM_176798	-0.156466	0.0271468
chr11	64644487	cg25170017	EHD1	NM_006795	0.145988	0.0271468
chr3	65345027	cg12403190	MAGI1	NM_015520;NM_001033057;NM_004742	-0.107304	0.0271468
chr2	169100915	cg11775828	STK39	NM_013233	0.111387	0.0271468
chr17	61847885	cg08782002	CCDC47	NM_020198	-0.116563	0.0271468
chr6	106434429	cg09187505			-0.181652	0.0271468
chr2	113298655	cg12937159	POLR1B	NM_019014;NM_001137604	-0.117907	0.0272446
chr1	223738388	cg06354916	CAPN8	NM_001143962	-0.159604	0.0272775
chr10	101296036	cg03711485	NKX2-3	NM_145285	-0.107523	0.0273699
chr1	17421315	cg04934305	PADI2	NM_007365	0.141337	0.0274312
chr20	55904768	cg20802515	SPO11	NM_012444;NM_198265	-0.101723	0.0275393
chr6	35707957	cg01618151	C6orf81	NM_145028	-0.130602	0.0275393
chr3	151048337	cg12207930	MED12L	NM_053002;NM_176894	-0.131833	0.0275393
chr10	18549778	cg02635932	CACNB2	NM_000724;NM_201593;NM_201572;NM_000724;NM_201571;NM_201597;NM_201596;NM_001167945	-0.106811	0.0275877
chr13	76207486	cg13134634	LMO7	NM_005358	0.105247	0.0275877
chr11	128776216	cg19546057	C11orf45	NM_145013;NM_000890	-0.132737	0.0276321
chr16	81039458	cg06002197	CENPN	NM_001100624;NM_018455;NM_001100625;NM_020188	0.11298	0.0278398
chr6	25027618	cg06657721			0.179153	0.0278509
chr16	11410036	cg02909570			-0.125893	0.0278509
chr18	615496	cg23713900	CLUL1	NM_199167;NM_014410	-0.126307	0.0278509
chr19	18700553	cg25979108	C19orf60	NM_001100419;NM_001100418	0.112838	0.0278509
chr14	105391263	cg18875357	PLD4	NM_138790;NM_138790	-0.116135	0.0278841
chr22	37309487	cg01064979	CSF2RB	NM_000395	-0.120894	0.0279935
chr8	58055024	cg09858108			-0.160464	0.0280597
chr12	2027805	cg17737835	CACNA2D4	NM_172364;NM_172364	-0.124394	0.0282228
chr7	119499	cg04650322			-0.130115	0.0282296
chr15	101715747	cg12042714			-0.173973	0.0282969
chr1	43402591	cg05942022	SLC2A1	NM_006516	0.114274	0.0284697
chr6	133035379	cg24964103	VNN1	NM_004666	-0.195883	0.0284801
chr19	19729048	cg00591868	PBX4	NM_025245	0.120438	0.0285828
chr11	1769462	cg20272155	HCCA2	NM_053005;NM_001170820	0.102051	0.0285994
chr6	116600143	cg19341652	DSE	NM_001080976;NM_003309	0.108448	0.0286573
chr17	25799018	cg05784862	KSR1	NM_014238	0.119786	0.0286573
chr3	187491295	cg11870455			-0.165796	0.0286573
chr5	169816214	cg19502709	KCNIP1	NM_001034838;NM_004137	-0.107173	0.0286884
chr8	57030824	cg18041277			-0.15247	0.0286884
chr6	160380572	cg23344523			-0.12615	0.0287388
chr4	6940915	cg06496803	TBC1D14	NM_001113361;NM_020773	-0.140291	0.0287388
chr7	157648749	cg12600749	PTPRN2	NM_002847;NM_130842;NM_130843	-0.107992	0.0287388
chr16	84760429	cg26562921	USP10	NM_005153	-0.127887	0.0287388
chr19	7538218	cg25273451	LOC100128573	NR_024491	-0.151761	0.0287738
chr5	598817	cg08277306			0.116438	0.0289739
chr5	13810279	cg08818829	DNAH5	NM_001369	-0.10154	0.0291353
chr1	26685827	cg01200442			0.109559	0.0291353
chr1	36948570	cg14523574	CSF3R	NM_156038;NM_156039;NM_000760;NM_172313	-0.126028	0.0292641
chr6	3025325	cg09740468			-0.174407	0.0292641
chr14	69042922	cg06894612	RAD51L1	NM_133509	-0.156559	0.0292851
chr5	179520998	cg17554875			-0.12359	0.0294695
chr15	38334926	cg16387834			-0.123626	0.0295249
chr19	18945153	cg14207833	UPF1	NM_002911	0.114958	0.0295249
chr13	50908713	cg00373763			-0.109307	0.0295249
chr17	41437376	cg25062533			-0.118308	0.0295737
chr16	1822124	cg09540102	NME3	NM_002513;NM_023936;NM_001010865	0.106567	0.0295862
chr17	40823930	cg19987356	PLEKHH3	NM_024927	0.120274	0.0296995
chr1	2764669	cg03976856			0.117191	0.0296995
chr6	10430644	cg21967790	C6orf218	NR_027793	0.12363	0.0296995
chr17	48502312	cg03919657	ACSF2	NM_025149	-0.118079	0.0296995
chr17	41450195	cg10499832	LOC100130581	NR_027412	-0.147779	0.0297461
chr10	49815243	cg11095743			-0.125023	0.0297461
chr15	100893944	cg25508830			-0.148433	0.0297625
chr3	181414848	cg01530605	SOX2OT	NR_004053	-0.123263	0.0298033
chr8	24241694	cg01759110	ADAMDEC1	NM_001145272;NM_001145271;NM_014479	-0.152256	0.029835
chr3	39470521	cg25112848			-0.120433	0.029835
chr1	86081701	cg19800670			-0.106697	0.0300745
chr14	98444417	cg16062483	C14orf64	NR_015430	0.154672	0.0300745
chr17	25802282	cg14394837	KSR1	NM_014238	0.112779	0.0300745
chr5	32522933	cg26873329			-0.18909	0.0300745
chr11	123322182	cg25243766			0.106102	0.0300745
chr11	69019375	cg21909390			0.133734	0.030081
chr17	1131424	cg26247880			-0.106154	0.0301234
chr21	44985092	cg15536230	HSF2BP	NM_007031	-0.154179	0.0301443
chr19	8398590	cg22857356	KANK3	NM_198471	0.193069	0.0301443
chr1	42384474	cg03884592	HIVEP3	NM_001127714;NM_024503;NM_024503;NM_001127714	0.133726	0.0301926
chr3	133191297	cg04231050	BFSP2	NM_003571	-0.127638	0.0303064
chr20	23067752	cg12037947	CD93	NM_012072	-0.11982	0.0303064
chr7	151087534	cg01545109	WDR86	NM_198285	-0.137867	0.0303667
chr21	46325853	cg04217515	ITGB2	NM_000211;NM_001127491	-0.13041	0.030513
chr7	130372167	cg11058932	TSGA13	NM_052933	-0.118461	0.0305906
chr17	80545175	cg18128058	FOXK2	NM_004514	-0.123711	0.0306052
chr6	126658808	cg16182757			-0.121033	0.0306607
chr3	108019540	cg11326415			0.119295	0.0308311
chr8	144410972	cg17117981	TOP1MT	NM_052963	-0.136144	0.0308311
chr14	105113991	cg27289402			-0.124007	0.0308625
chr2	177356276	cg06065019			0.137444	0.0308625
chr12	52585849	cg20225745	KRT80	NM_001081492;NM_182507	0.105556	0.0309097
chr2	42719678	cg21129729	KCNG3	NM_133329;NM_172344	-0.1052	0.0309726
chr1	161442738	cg09846895			-0.160108	0.0309726
chr2	25527366	cg10239163	DNMT3A	NM_022552;NM_175630;NM_175629	-0.152551	0.0309726
chr10	70096482	cg16896539	HNRNPH3	NM_021644;NM_012207	0.14488	0.0309726
chr1	36581751	cg04482628			-0.131666	0.0309726
chr10	61664954	cg05901196	CCDC6	NM_005436	0.105969	0.0309726
chr6	31582285	cg15343510	AIF1	NM_001623;NM_004847	-0.113317	0.0309726
chr15	22550643	cg11465404			-0.120127	0.0309726
chr15	59700360	cg05061769			-0.17476	0.0309726
chr22	19162276	cg15498348			0.162225	0.0309726
chr21	38349937	cg21871091	HLCS	NM_000411	0.20523	0.0310311
chr4	183730758	cg04181038			-0.255456	0.0312067
chr6	32905114	cg19268453	HLA-DMB	NM_002118	-0.176019	0.0312067
chr17	17185060	cg21908344	COPS3	NM_003653	-0.122661	0.0312134
chr18	56701751	cg26919186	LOC390858	NR_024021	0.116237	0.0313064
chr22	45125218	cg16326073	PRR5	NM_015366;NM_001017529;NM_001017528;NM_181334;NM_001017530;NM_181333	-0.101191	0.0314022
chr16	8806531	cg01881182	ABAT	NM_020686;NM_000663	0.113963	0.0314022
chr12	125223679	cg03117611			0.101267	0.0314155
chr17	3461140	cg16390380	TRPV3	NM_145068;NM_145068	0.12543	0.0314155
chr17	3790402	cg20871826	CAMKK1	NM_172207;NM_172206;NM_032294	-0.10071	0.0314155
chr2	241832900	cg01588581	C2orf54	NM_024861;NM_001085437	0.137251	0.0314261
chr16	68027839	cg10512278	DPEP2	NM_022355	-0.143495	0.0314715
chr6	167738594	cg12215675	TTLL2	NM_031949;NM_031949	-0.144211	0.0316402
chr6	16198548	cg18221983			-0.13478	0.0316402
chr1	117610620	cg10021122	TTF2	NM_003594	0.100994	0.0316402
chr19	51858208	cg17110052	ETFB	NM_001014763;NM_001985	0.102966	0.0316402
chr2	25600451	cg02068690	DTNB	NM_033147;NM_033148;NM_183361;NM_021907;NM_183360	0.109129	0.0316402
chr19	50553699	cg21634218	FLJ26850	NR_027257	0.124961	0.0316402
chr3	111314102	cg25298754	ZBED2	NM_024508;NM_198196;NM_005816	0.1135	0.0317067
chr7	2778058	cg23304647	GNA12	NM_007353	-0.1548	0.0318453
chr8	128808017	cg25247520	MIR1204	NR_031609;NR_003367	0.111278	0.0318453
chr4	7945149	cg05577016			-0.103881	0.0318453
chr21	33247276	cg17131262	HUNK	NM_014586	0.12157	0.0318551
chr11	1769382	cg08269485	HCCA2	NM_053005;NM_001170820	0.146292	0.0318551
chr20	57583328	cg06125903	CTSZ	NM_001336	-0.150411	0.0318833
chr3	155422129	cg11932158	PLCH1	NM_014996	-0.114482	0.0320238
chr7	57247978	cg17717697	LOC642006	NR_030766	0.144867	0.032034
chr2	10572946	cg23452752			0.134147	0.032034
chr8	143206674	cg03899054			-0.101652	0.032034
chr2	169769501	cg15742848			0.100325	0.0321149
chr8	22547688	cg07082452	EGR3	NM_004430	-0.143676	0.0321149
chr1	12675968	cg03546360	DHRS3	NM_004753	-0.115565	0.0321682
chr15	90724460	cg05310486			-0.175224	0.0322307
chr16	50347849	cg10341242	ADCY7	NM_001114	-0.142224	0.0323007
chr1	247420421	cg25771854	VN1R5	NM_173858	0.374788	0.0323007
chr16	87588559	cg08830502			-0.135731	0.0323391
chr6	29942951	cg07370894	HCG9	NR_028032	-0.122117	0.0323517
chr19	2052564	cg21030400	MKNK2	NM_017572;NM_199054	0.108372	0.0323767
chr12	131403068	cg08425508			0.10841	0.0323767
chr17	34795793	cg07387471	TBC1D3C	NM_001001418	0.112688	0.0323767
chr20	18491484	cg12339328	SEC23B	NM_032985;NM_006363;NM_032986	-0.173198	0.0323767
chr11	1769409	cg08966208	HCCA2	NM_053005;NM_001170820	0.109801	0.0324974
chr7	2564966	cg13568415	LFNG	NM_001166355;NM_001040167;NM_001040168;NM_002304	0.146681	0.0326371
chr7	968493	cg21842920	ADAP1	NM_006869	-0.179327	0.0326371
chr6	41407766	cg26223899			-0.120805	0.0326371
chr7	74378637	cg00475182	GATSL1	NM_001145063	-0.134336	0.0327417
chr1	178310534	cg22109530	RASAL2	NM_170692;NM_004841	0.113356	0.0327417
chr5	77830465	cg05497253	LHFPL2	NM_005779	-0.141376	0.032767
chr6	27637520	cg10507304			0.122549	0.0328108
chr17	40284046	cg00435173	RAB5C	NM_201434;NM_004583	-0.13693	0.0328231
chr21	46890907	cg26852712	COL18A1	NM_130444;NM_030582;NM_130445	0.239975	0.0328515
chr13	52093016	cg24674269			-0.105053	0.0328515
chr1	36788416	cg16394290	FAM176B	NM_018166	-0.110785	0.0328681
chr4	154711629	cg10663078	SFRP2	NM_003013	-0.100047	0.0328681
chr10	384652	cg14072016	DIP2C	NM_014974	0.118419	0.0328785
chr21	45773997	cg23312431	TRPM2	NM_003307	-0.187446	0.0329388
chr11	2118566	cg08227583			0.105907	0.0329999
chr12	2338399	cg20495738	CACNA1C	NM_001129844;NM_001129827;NM_001129839;NM_001129834;NM_001129841;NM_000719;NM_001129830;NM_001167625;NM_001129843;NM_001167624;NM_001129835;NM_001129837;NM_001167623;NM_001129840;NM_199460;NM_001129833;NM_001129832;NM_001129829;NM_001129846;NM_001129836;NM_001129838;NM_001129831;NM_001129842	-0.163851	0.0330368
chr4	165878742	cg03508095	C4orf39	NM_153027;NM_001012414;NM_153027	0.123146	0.0330368
chr10	134188873	cg15083522	LRRC27	NM_001143757;NM_030626	-0.257992	0.0330368
chr20	57583188	cg12787553	CTSZ	NM_001336	-0.125455	0.0330621
chr17	8311836	cg00061635			0.137657	0.0330935
chr11	93271083	cg07744502	C11orf75	NM_020179	-0.107794	0.0331158
chr9	19379118	cg01331992	RPS6	NM_001010	0.105452	0.0331629
chr17	4636830	cg15052890	MED11	NM_001001683;NM_022059	-0.109821	0.0331773
chr1	153589781	cg16348003	S100A14	NM_020672	0.116153	0.0332851
chr22	22599332	cg18441959	VPREB1	NM_007128	0.108818	0.0333342
chr6	4607680	cg06483505			0.102538	0.0334273
chr17	77962098	cg20443278	TBC1D16	NM_019020	0.106831	0.0334273
chr17	3820044	cg03368358	P2RX1	NM_002558	-0.101595	0.0334337
chr20	3052262	cg13725599	OXT	NM_000915	-0.129818	0.0334399
chr15	70328301	cg05206657			-0.157293	0.0334929
chr2	240152257	cg19955928	HDAC4	NM_006037	-0.113453	0.0334929
chr8	145163102	cg14631276	KIAA1875	NR_024207	-0.111865	0.0334929
chr8	144408506	cg21435473	TOP1MT	NM_052963	-0.12819	0.0334929
chr2	30457110	cg17250262	LBH	NM_030915	0.120413	0.0334929
chr1	9748971	cg03265564	PIK3CD	NM_005026	0.102403	0.0334929
chr8	130691556	cg25760227			-0.146343	0.0334929
chr19	36400425	cg06707369	TYROBP	NM_003332;NM_198125	-0.1008	0.0335295
chr5	134770100	cg01610123			-0.135814	0.0335461
chr8	42234803	cg02571142	DKK4	NM_014420	-0.100078	0.0335769
chr5	23507617	cg25472530	PRDM9	NM_020227	-0.176232	0.0335769
chr1	2245221	cg24925741			0.273775	0.033651
chr19	54600295	cg05006449	OSCAR	NM_133168;NM_206818;NM_133169;NM_130771	-0.183875	0.0336854
chr3	31935279	cg26337497	OSBPL10	NM_017784	-0.255408	0.0336854
chr20	49410810	cg11769476	BCAS4	NM_198799;NM_001010974;NM_017843	-0.11746	0.0336854
chr13	95354021	cg17775765			-0.105575	0.0336854
chr8	145917243	cg26895804			-0.102186	0.0336854
chr15	101568217	cg25663823	LRRK1	NM_024652	0.10189	0.0336854
chr12	54778312	cg12962778	ZNF385A	NM_001130968;NM_001130967;NM_015481;NM_015481	-0.12937	0.0336854
chr9	139637526	cg16463229	LCN10	NM_001001712	0.157842	0.0336854
chr17	69029659	cg13308964			-0.10918	0.0336854
chr1	159261560	cg24642483	FCER1A	NM_002001	-0.150818	0.0336854
chr1	236135584	cg09136878			-0.161951	0.0336854
chr1	7308091	cg12710648	CAMTA1	NM_015215	-0.105172	0.0336854
chr3	181417613	cg06283493	SOX2OT	NR_004053	-0.111937	0.0336854
chr3	57743377	cg15172734	SLMAP	NM_007159;NM_007159	0.111405	0.0336854
chr4	148928832	cg06570358	ARHGAP10	NM_024605	-0.160313	0.0336854
chr20	3052253	cg01644611	OXT	NM_000915	-0.116178	0.0336854
chr4	183795822	cg21757281			-0.170155	0.0336854
chr1	42384310	cg23762517	HIVEP3	NM_001127714;NM_024503;NM_024503;NM_001127714	0.131602	0.0336859
chr7	139529130	cg12104698	TBXAS1	NM_001130966;NR_029394;NM_030984;NM_001166254;NM_030984;NM_001166253;NM_001061;NM_001166253;NM_001061	-0.129504	0.0337206
chr2	27850192	cg17051239	CCDC121	NM_001142682;NM_024584;NM_001145047;NM_001145049;NM_001142683;NM_001145048	-0.106612	0.033725
chr19	45912979	cg02768785	CD3EAP	NM_012099;NM_001983;NM_001166049	-0.123168	0.033725
chr20	23067691	cg15309910	CD93	NM_012072	-0.128949	0.0338048
chr21	30565636	cg00847857	NCRNA00189	NR_027072	-0.163425	0.033809
chr10	85974172	cg00169964	PCDH21	NM_033100	-0.100929	0.0338233
chr14	106041833	cg16422365			0.102304	0.0338612
chr2	430882	cg07095908			-0.122086	0.0338619
chr19	16990306	cg05300762	SIN3B	NM_015260	-0.122034	0.0339992
chr19	53449742	cg09915433			0.171949	0.0340062
chr9	84303358	cg20926353	TLE1	NM_005077;NM_005077	-0.186423	0.0340062
chr5	39413038	cg25105652	DAB2	NM_001343	-0.13113	0.0340062
chr20	57583000	cg21331324	CTSZ	NM_001336	-0.121523	0.0340071
chr10	49893445	cg17967780	WDFY4	NM_020945	-0.10987	0.0340071
chr6	114131273	cg15417249			-0.10244	0.0340071
chr6	156967138	cg05081167			-0.112908	0.0340071
chr14	89631502	cg18569623	FOXN3	NM_005197;NM_001085471	-0.119735	0.0340071
chr1	42380309	cg11735008	HIVEP3	NM_024503;NM_001127714	0.124469	0.0340964
chr10	81053187	cg06162030	ZMIZ1	NM_020338	-0.153917	0.0340964
chr13	111318555	cg12423658	CARS2	NM_024537	-0.118075	0.0340964
chr6	32942494	cg26953232	BRD2	NM_001113182;NM_005104	0.109696	0.0340964
chr14	55143755	cg26437697	SAMD4A	NM_001161576;NM_015589	-0.154329	0.0340964
chr20	62156756	cg24291747			0.102185	0.0340964
chr20	3693158	cg14921416			-0.118909	0.034126
chr14	71110536	cg08280368	TTC9	NM_015351	0.111185	0.0341523
chr2	65085764	cg00810971			-0.121343	0.0341578
chr22	18507747	cg11945372	MICAL3	NM_001136004;NM_015241;NM_001122731	0.116849	0.0342954
chr17	4799244	cg17788994	MINK1	NM_015716;NM_153827;NM_001024937;NM_170663	-0.109824	0.0343565
chr1	24525390	cg23806196	LOC284632	NR_027087	-0.12472	0.0343654
chr14	21359737	cg09842118	RNASE3	NM_002935	-0.119793	0.0343759
chr11	87080622	cg04883472			-0.134784	0.0343759
chr11	129062277	cg06466839	RICS	NM_001142685	0.129161	0.0343824
chr4	146831054	cg05267427	ZNF827	NM_178835	0.171714	0.0343824
chr1	2458466	cg17128799	PANK4	NM_018216	0.103776	0.0343824
chr10	95123774	cg11276093	MYOF	NM_133337;NM_013451	-0.115257	0.0343824
chr13	88328294	cg09823859	SLITRK5	NM_015567	-0.109538	0.0344098
chr6	42946146	cg19747945	PEX6	NM_000287	0.104947	0.0344724
chr8	128808063	cg11201447	MIR1204	NR_031609;NR_003367	0.14771	0.0344959
chr4	155702409	cg22103164	RBM46	NM_144979	-0.165601	0.0344959
chr2	1609119	cg16151651			-0.107101	0.034537
chr6	106475062	cg02270332			-0.15832	0.0345439
chr8	57030523	cg08415582			-0.139114	0.0345439
chr2	180130081	cg01231381	SESTD1	NM_178123	-0.156168	0.0345858
chr13	114828455	cg16962442	RASA3	NM_007368	-0.152924	0.0346439
chr6	143837891	cg00639635			-0.121668	0.0346439
chr16	21569546	cg05971876			0.114957	0.0346439
chr7	2060040	cg11870042	MAD1L1	NM_003550;NM_001013837;NM_001013836	-0.118455	0.0346439
chr12	52888292	cg10580110	KRT6A	NM_005554	-0.190537	0.0346818
chr2	10447890	cg14118850	HPCAL1	NM_002149;NM_134421	-0.151431	0.0346846
chr2	234741670	cg04627863			0.101386	0.0346846
chr22	26938937	cg09856467	TPST2	NM_003595;NM_001008566	-0.108346	0.0347051
chr15	90608429	cg15188623	ZNF710	NM_198526	-0.164919	0.034762
chr1	3649473	cg17804348	TP73	NM_001126240;NM_005427;NM_001126242;NM_001126241	-0.107445	0.0348259
chr11	45879730	cg23097878	CRY2	NM_001127457;NM_021117	-0.21631	0.0348259
chr8	28961315	cg07023317	KIF13B	NM_015254	-0.190382	0.0348755
chr2	33780366	cg18200741	RASGRP3	NM_001139488;NM_015376;NM_170672	-0.116233	0.0349381
chr6	67741651	cg26213663			0.106169	0.0349381
chr5	23507594	cg07011961	PRDM9	NM_020227	-0.16876	0.0349381
chr15	81475638	cg01001286			-0.114909	0.0349381
chr20	32235621	cg17618872	CBFA2T2	NM_005093;NM_001039709;NM_001032999	0.11405	0.0349381
chr20	1448595	cg13226290	NSFL1C	NM_182483;NM_016143;NM_018839	-0.195061	0.0349381
chr1	175042297	cg16651347	TNN	NM_022093	-0.15884	0.0349381
chr11	14562955	cg26165081	PSMA1	NM_148976	-0.102118	0.0349381
chr3	127868625	cg16899991			-0.181638	0.0350649
chr6	33039804	cg04049719	HLA-DPA1	NM_033554	0.143987	0.0351067
chr11	72868833	cg08069287			-0.126418	0.0351137
chr17	3303148	cg06965839	OR1E1	NM_003553	0.113144	0.0351137
chr7	2417629	cg07550684	EIF3B	NM_001037283;NM_003751	-0.139748	0.0351137
chr8	26467541	cg10789956	DPYSL2	NM_001386	-0.16614	0.0351137
chr6	32805398	cg12854186	TAP2	NM_000544;NM_018833	0.104099	0.035138
chr7	47541543	cg06114556	TNS3	NM_022748	-0.108182	0.0353743
chr16	88705016	cg27132152	IL17C	NM_013278;NM_013278	0.107031	0.0353743
chr2	128052889	cg14306819	ERCC3	NM_000122	-0.192082	0.0353743
chr7	3020536	cg27202779	CARD11	NM_032415	-0.173163	0.0355497
chr3	19930780	cg25975856	EFHB	NM_144715	-0.243442	0.0355852
chr11	61730880	cg21988813	BEST1	NM_004183;NM_001139443	-0.127478	0.0355864
chr16	50347766	cg16548911	ADCY7	NM_001114	-0.140217	0.0356141
chr20	6023178	cg16291589	LRRN4	NM_152611	-0.184645	0.0356141
chr1	112161618	cg06205333	RAP1A	NM_001010935;NM_002884	-0.21108	0.0356141
chr3	187388281	cg07120369	SST	NM_001048	0.112634	0.0356141
chr10	49893026	cg26246740	WDFY4	NM_020945	-0.113482	0.0357379
chr1	3071963	cg20236995	PRDM16	NM_022114;NM_199454	-0.116547	0.0357379
chr9	140942584	cg21216258	CACNA1B	NM_000718	-0.12909	0.0357379
chr17	8094552	cg02067584	C17orf59	NM_017622	-0.170649	0.0357379
chr6	32897912	cg23581252			-0.152488	0.0358425
chr19	2700927	cg20091384	GNG7	NM_052847	0.138694	0.0358425
chr7	157648699	cg06352807	PTPRN2	NM_002847;NM_130842;NM_130843	-0.100222	0.0358448
chr15	78918529	cg12057576	CHRNB4	NM_000750	0.110549	0.0358697
chr1	222224088	cg13478010			-0.127626	0.0358993
chr17	36162433	cg12582728			0.102665	0.0358993
chr17	943108	cg03131556	ABR	NM_021962;NM_001092;NM_001159746	-0.143745	0.0358993
chr1	202130692	cg25754958	PTPN7	NM_002832	-0.116692	0.0359417
chr12	125087686	cg11147471			-0.143746	0.0359583
chr19	41618922	cg06579354	CYP2F1	NM_000774	0.121274	0.0359583
chr15	21964652	cg17720087			-0.113426	0.0359583
chr17	8250623	cg01678701			-0.116118	0.0360033
chr22	19949965	cg06346307	COMT	NM_001135162;NM_001135161;NM_000754;NM_007310	0.117883	0.0360033
chr13	113292824	cg14227911			0.105057	0.0360091
chr7	128482561	cg10826733	FLNC	NM_001127487;NM_001458	0.10951	0.0360091
chr12	49413435	cg05581469	MLL2	NM_003482;NM_212461;NM_002733	-0.141288	0.0360162
chr13	111318160	cg17394623	CARS2	NM_024537	-0.17724	0.0360162
chr11	61388864	cg17271269	RPLP0P2	NR_002775	-0.187687	0.0360339
chr17	2060623	cg23403980	SMG6	NM_017575;NM_001170957	-0.137437	0.0360339
chr7	10490913	cg14881054			0.130485	0.0360339
chr2	74875227	cg20945085	C2orf65	NM_138804	-0.113052	0.036109
chr22	31794522	cg10827767	DRG1	NM_004147	-0.130752	0.036109
chr7	2340959	cg22319052	SNX8	NM_013321	0.106017	0.0361262
chr19	54604124	cg14511156	OSCAR	NM_133168;NM_206818;NM_133169;NM_130771;NM_133169;NM_130771;NM_133168;NM_206818	-0.102276	0.0361963
chr10	6183872	cg19726711			0.16675	0.0361963
chr11	65378622	cg05436845	MAP3K11	NM_002419	-0.168871	0.0363856
chr2	70312492	cg16450677			0.155953	0.0363965
chr8	82042993	cg25230327			-0.131053	0.0364325
chr19	891986	cg04340203	MED16	NM_005481	0.10985	0.0364518
chr13	108867111	cg07403350	LIG4	NM_002312;NM_002312;NM_206937;NM_001098268	0.157497	0.0364627
chr18	60904418	cg23756272	BCL2	NM_000633	-0.104174	0.0367442
chr1	116923256	cg25346117	ATP1A1	NM_001160233;NM_000701	-0.100427	0.0368097
chr5	34772160	cg18252037	RAI14	NM_001145525;NM_001145520;NM_001145521;NM_015577;NM_001145523;NM_001145522	0.124106	0.0368415
chr21	48025691	cg07685786	S100B	NM_006272	-0.107719	0.0368415
chr15	58812960	cg03029090	LIPC	NM_000236	-0.180498	0.0368415
chr2	8784813	cg04341343			-0.124254	0.0368415
chr12	123753212	cg14844236	CDK2AP1	NM_004642	-0.150195	0.0368415
chr17	48056033	cg17828456			-0.105008	0.0368894
chr15	99551997	cg16261114	LOC145814	NM_001167902	-0.170798	0.0369133
chr3	196352027	cg25771026			-0.168941	0.0369133
chr17	76495017	cg27052709	DNAH17	NM_173628	0.120657	0.0369133
chr10	90552437	cg12487655			-0.118628	0.0369138
chr17	26697281	cg21846903	VTN	NM_000638;NM_000638	-0.123752	0.0369398
chr12	125249923	cg11118440			-0.135625	0.0369457
chr19	54604098	cg21073459	OSCAR	NM_133168;NM_206818;NM_133169;NM_130771;NM_133169;NM_130771;NM_133168;NM_206818	-0.126216	0.0369608
chr12	109569116	cg00095930			0.107101	0.0369932
chr6	31555016	cg03739609	LST1	NR_029461;NM_007161;NM_205839;NM_205838;NM_001166538;NR_029462;NM_205840;NM_205837;NM_001166538;NM_007161;NM_205840	-0.182695	0.0369995
chr13	113646732	cg09294084	MCF2L	NM_001112732;NM_024979	-0.130466	0.0369995
chr12	54811762	cg02419321	ITGA5	NM_002205	-0.122199	0.0369995
chr4	1167230	cg10852718	LOC100130872-SPON2	NR_033182;NM_012445;NM_001128325	-0.104865	0.0370023
chr2	31455443	cg13149833	EHD3	NM_014600	-0.131607	0.0370239
chr1	27962037	cg00065048	FGR	NM_005248	-0.127062	0.0370239
chr20	57582894	cg01623438	CTSZ	NM_001336	-0.149713	0.0370239
chr5	134661102	cg02198988			0.124396	0.0371032
chr2	11515164	cg11972534			0.149044	0.0371162
chr7	75626860	cg09335715	STYXL1	NM_016086	-0.164418	0.0371162
chr10	49892741	cg00404025	WDFY4	NM_020945	-0.114391	0.0371162
chr11	58980502	cg27236490	MPEG1	NM_001039396	-0.138902	0.0371378
chr10	47733773	cg11615495			-0.10115	0.0372912
chr16	3639688	cg27094376	BTBD12	NM_032444	-0.199978	0.0373174
chr5	176935305	cg19647567	DOK3	NM_024872;NM_001144876;NM_001144875	-0.160305	0.0373691
chr20	62368256	cg12413156	LIME1	NM_017806	0.126089	0.0375087
chr20	1310846	cg21524538	SDCBP2	NM_080489	0.111446	0.0375497
chr10	26681244	cg05265884			-0.117915	0.0375497
chr1	39249425	cg18150908			0.102506	0.0375497
chr6	30860300	cg17879299	DDR1	NM_013993;NM_001954;NM_013994	-0.105488	0.0375564
chr6	32905127	cg01374870	HLA-DMB	NM_002118	-0.172018	0.0375745
chr19	667808	cg12106403			-0.145871	0.0375924
chr11	86142478	cg18725375			-0.133256	0.0377043
chr2	64632636	cg14209730			-0.148166	0.037745
chr9	139538535	cg14276557			-0.119623	0.037745
chr10	126599966	cg07906193			-0.129026	0.037745
chr21	38362725	cg14785464	HLCS	NM_000411	0.155825	0.037745
chr20	62367893	cg20513976	LIME1	NM_017806	0.199909	0.037745
chr12	54690818	cg09303642	NFE2	NM_006163;NM_001136023	-0.157639	0.037745
chr5	140605851	cg09816420	PCDHB14	NM_018934;NM_018934	0.106308	0.037745
chr8	105677501	cg20788020			0.100375	0.037745
chr4	6691093	cg22077313			0.102425	0.0377728
chr13	24824078	cg02659854	SPATA13	NM_001166271;NM_153023	-0.159524	0.0377856
chr1	110757770	cg26189021	KCNC4	NM_001039574;NM_153763;NM_004978	0.114528	0.0377856
chr10	94451736	cg16508068	HHEX	NM_002729	-0.113805	0.0377856
chr2	74783039	cg22989958	DOK1	NM_001381	-0.128073	0.0377856
chr17	80022616	cg05898092	DUS1L	NM_022156	0.10101	0.0377856
chr4	183728196	cg03209412			-0.118189	0.0377856
chr11	67788125	cg18412889	ALDH3B1	NM_001161473;NM_000694;NM_001030010	0.103588	0.0377856
chr4	54582825	cg10129391			-0.126438	0.0377856
chr1	156046832	cg02977575	MEX3A	NM_001093725	-0.102307	0.0377856
chr20	62492074	cg09868035	C20orf135	NM_080622	-0.136389	0.0377856
chr21	35884376	cg21088514	KCNE1	NM_000219	-0.144169	0.0377856
chr14	101014148	cg01991752	BEGAIN	NM_001159531;NM_020836	-0.11893	0.0378666
chr22	37256900	cg09624565	NCF4	NM_013416;NM_000631	-0.101394	0.0378724
chr15	48625058	cg25865120	DUT	NM_001025249;NM_001948;NM_001025248	0.1066	0.0379351
chr7	4762606	cg22753962	FOXK1	NM_001037165	0.116636	0.0379456
chr1	16154831	cg21385522			0.103446	0.0379456
chr1	231174153	cg16908552	FAM89A	NM_198552	-0.120033	0.0379624
chr22	28249567	cg26564117	PITPNB	NM_012399	-0.112619	0.0380004
chr5	170845058	cg00546757			0.443428	0.0380599
chr8	143535580	cg20042662			0.147069	0.0380599
chr12	52367989	cg09039672	ACVR1B	NM_004302;NM_020327;NM_020328	-0.105712	0.0380599
chr11	66104481	cg23220439	RIN1	NM_004292	0.116971	0.0380599
chr16	3137690	cg00449812			-0.13347	0.0380599
chr6	107781506	cg01916632	PDSS2	NM_020381	-0.106285	0.0380599
chr10	43891547	cg04641860	HNRNPF	NM_001098207;NM_001098205;NM_001098208;NM_001098206;NM_001098204;NM_004966	0.154177	0.0380599
chr16	88238863	cg00274640			-0.314365	0.038202
chr1	181057279	cg22801949	IER5	NM_016545	-0.10738	0.0382239
chr7	25018565	cg23191354	OSBPL3	NM_015550;NM_145322;NM_145320;NM_145321	0.110822	0.038227
chr19	36247869	cg24673765	HSPB6	NM_144617;NM_001039887	-0.102209	0.0382556
chr11	116706051	cg19299755			-0.128052	0.0382556
chr3	72320634	cg07385778			-0.132574	0.0382599
chr12	55248207	cg16387046	MUCL1	NM_058173	0.112974	0.0382599
chr19	47258676	cg12156512	FKRP	NM_001039885;NM_024301	-0.147117	0.0383257
chr17	56082867	cg08591265	SFRS1	NM_001078166;NM_006924	0.106511	0.0383257
chr21	35884348	cg01183122	KCNE1	NM_000219	-0.135607	0.0383257
chr3	32856104	cg03998606			-0.116188	0.038358
chr17	3819390	cg01526089	P2RX1	NM_002558	-0.133587	0.0384468
chr2	160491979	cg08287940			-0.177432	0.0384957
chr1	179945973	cg18278694	CEP350	NM_014810	-0.144294	0.0384988
chr21	30452964	cg24753998	C21orf7	NM_020152;NM_020152	-0.134718	0.0384988
chr20	1600641	cg02198625	SIRPB1	NM_001135844;NM_001083910;NM_001135844;NM_001083910;NM_006065;NM_006065	-0.106458	0.0384988
chr1	247581417	cg21991396	NLRP3	NM_001127462;NM_001079821;NM_183395;NM_183395;NM_004895;NM_004895;NM_001127461;NM_001127462	-0.195396	0.0384988
chr2	98704858	cg16326590	VWA3B	NM_144992	-0.124193	0.0384988
chr11	69286145	cg01969701			-0.1021	0.0384988
chr4	8174148	cg09390241			0.166595	0.0384988
chr9	101553307	cg21182108	ANKS6	NM_173551	0.104628	0.0384988
chr17	40123227	cg20212624	CNP	NM_033133	-0.119235	0.0384988
chr22	45609419	cg20026613	C22orf9	NM_001009880;NM_015264	-0.183888	0.0384988
chr6	86171768	cg24702826	NT5E	NM_002526	-0.120587	0.0385214
chr12	125027794	cg15645138			0.108739	0.0385988
chr11	114043903	cg07631435	ZBTB16	NM_006006;NM_001018011	0.103265	0.038664
chr3	190024765	cg10475153	CLDN1	NM_021101	0.106013	0.0386679
chr14	20666088	cg16746221	OR11G2	NM_001005503	-0.147124	0.0386679
chr11	117698932	cg14899408	FXYD2	NM_021603	0.119714	0.0386704
chr20	23067771	cg12873119	CD93	NM_012072	-0.128255	0.0386911
chr6	41840102	cg25367558	USP49	NM_018561	-0.164803	0.0387067
chr8	20164433	cg09539496			0.101374	0.0387119
chr3	129335695	cg09668964			-0.100209	0.0387258
chr1	155910526	cg21284779	RXFP4	NM_181885	-0.10698	0.0387258
chr16	66521191	cg04466886			-0.116289	0.0387258
chr19	34311482	cg03070989			0.117206	0.0387773
chr8	58055591	cg08280861			-0.193481	0.0387778
chr3	46448134	cg23350385	CCRL2	NM_001130910;NM_003965	-0.141302	0.0387778
chr5	140530222	cg23596123	PCDHB6	NM_018939	0.171976	0.0387778
chr15	67022087	cg01678084	SMAD6	NM_001142861;NR_027654;NM_005585	0.106402	0.0388127
chr17	7018627	cg14089110	ASGR2	NM_080914;NM_001181;NM_080912;NM_080913	-0.108628	0.0388127
chr13	88328471	cg05757365	SLITRK5	NM_015567	-0.116034	0.0388415
chr17	7792059	cg15227911	CHD3	NM_001005271;NM_005852;NM_001005273	0.179409	0.0389071
chr1	28503368	cg14288403	PTAFR	NM_000952;NM_001164723;NM_000952;NM_001164721;NM_001164722	-0.104546	0.0389071
chr3	151048406	cg00091349	MED12L	NM_053002;NM_176894	-0.11272	0.0389071
chr1	172908788	cg15642380			-0.129186	0.0389996
chr10	126390317	cg09519218	FAM53B	NM_014661	-0.139603	0.0390567
chr4	83196047	cg17898925			-0.115389	0.0390923
chr16	4673974	cg03819286	MGRN1	NM_001142291;NM_001142290;NM_001142289;NM_015246	-0.14006	0.0390923
chr19	6887544	cg21308575	EMR1	NM_001974	-0.130655	0.0390941
chr10	31435673	cg09098522			-0.13868	0.0390941
chr11	68096165	cg12832726	LRP5	NM_002335	-0.116082	0.0391179
chr1	74665362	cg18854765	LRRIQ3	NM_001105659;NM_001112808;NM_003838	-0.159262	0.0391179
chr8	74198146	cg17187167			0.106705	0.0391179
chr2	128052778	cg06373940	ERCC3	NM_000122	-0.228964	0.0391179
chr11	71846733	cg10533990	FOLR3	NM_000804	-0.151091	0.0391179
chr5	138612986	cg15962267	SNHG4	NR_003141;NR_002915;NM_199189	0.110813	0.0391269
chr5	140552347	cg22190023	PCDHB7	NM_018940;NM_018940	0.119084	0.0391269
chr16	28518385	cg00201760	IL27	NM_145659	-0.130201	0.0391789
chr17	41018992	cg22303227	LOC90586	NR_002773	0.129949	0.039184
chr16	89185916	cg07474797	ACSF3	NM_174917;NR_023316;NM_001127214	-0.147872	0.039184
chr9	35618528	cg13409077	CD72	NM_001782	-0.108679	0.039184
chr7	2774543	cg01492538	GNA12	NM_007353	-0.142851	0.039184
chr16	57576594	cg01838544	GPR114	NM_153837	-0.123257	0.0391854
chr14	22309073	cg04277125			0.116891	0.039186
chr2	53764920	cg08025405			-0.111755	0.0392068
chr5	176936563	cg02357714	DOK3	NM_024872;NM_001144876;NM_001144875	-0.101408	0.0392069
chr7	872293	cg22972055	UNC84A	NM_025154;NM_001130965	0.106982	0.0392069
chr1	19337477	cg24405951			0.131631	0.0392069
chr10	6246406	cg01467100	PFKFB3	NM_004566;NM_001145443	0.10136	0.0392069
chr15	89709638	cg13460556	ABHD2	NM_152924;NM_007011	-0.147369	0.0392167
chr10	73103395	cg11480762	SLC29A3	NM_018344	-0.147056	0.0392481
chr1	229294380	cg25349990			-0.155785	0.0392481
chr2	233734115	cg25237894	C2orf82	NM_206895	0.103129	0.0392481
chr3	167238645	cg04903759	WDR49	NM_178824	-0.158821	0.0392481
chr2	16804452	cg02187259	FAM49A	NM_030797	-0.131816	0.0392638
chr21	45774294	cg24548817	TRPM2	NM_003307	-0.180755	0.0392779
chr8	104424477	cg10011091	SLC25A32	NM_030780	-0.153364	0.0392821
chr10	4720912	cg05177746	LOC100216001	NR_024475	-0.113361	0.0392855
chr2	157187204	cg00426720	NR4A2	NM_006186	-0.11387	0.0393253
chr20	62492233	cg09540612	C20orf135	NM_080622	-0.177681	0.0393599
chr12	67665055	cg14292572	CAND1	NM_018448	0.126076	0.0393999
chr1	44977246	cg11519930	RNF220	NM_018150	0.121051	0.0393999
chr13	112617069	cg05294112			-0.101578	0.039436
chr17	58499911	cg02172058	C17orf64	NM_181707;NM_181707	-0.118933	0.039436
chr17	46622536	cg23530553	HOXB2	NM_002145	-0.103108	0.039436
chr12	12222913	cg27366072	BCL2L14	NM_030766;NM_138723;NM_138722	-0.142776	0.039436
chr9	139716215	cg15032615	C9orf86	NM_017995;NM_024718	-0.103002	0.039436
chr7	75583421	cg20748065	POR	NM_000941	-0.127268	0.039436
chr7	30635762	cg21429551	GARS	NM_002047	0.111872	0.039436
chr3	52529341	cg02792780	STAB1	NM_015136	-0.129947	0.039436
chr17	80545454	cg07539709	FOXK2	NM_004514	-0.11433	0.039436
chr6	2958750	cg15068318	SERPINB6	NM_004568	-0.118952	0.0394883
chr7	151036715	cg03305017			-0.14204	0.0395868
chr1	101184332	cg04295372	VCAM1	NM_080682;NM_001078	-0.124668	0.0395868
chr7	2116512	cg03116466	MAD1L1	NM_003550;NM_001013837;NM_001013836	-0.132071	0.0395868
chr6	32819964	cg25042789	TAP1	NM_000593	0.208607	0.0395868
chr5	150226278	cg22000984	IRGM	NM_001145805;NM_001145805	-0.177488	0.0395923
chr5	140536496	cg02804091	PCDHB17	NR_001280	0.102412	0.0395923
chr17	21411890	cg02980566			-0.103806	0.0396203
chr15	90605618	cg00624799	ZNF710	NM_198526	0.122109	0.0397005
chr6	135517041	cg27434890	MYB	NM_005375;NM_001161657;NM_001161659;NM_001161658;NM_001130173;NM_001161660;NM_001161656;NM_001130172	-0.179354	0.0397005
chr12	19593453	cg08078137	AEBP2	NM_153207;NM_001114176	0.167154	0.0397005
chr12	132335942	cg22244940	MMP17	NM_016155	-0.22114	0.0397005
chr1	230961405	cg10232893			-0.14944	0.0397005
chr9	134544528	cg13655250	RAPGEF1	NM_198679;NM_005312	0.116698	0.0397065
chr13	67801125	cg23126342	PCDH9	NM_203487;NM_020403	0.12361	0.0397756
chr3	1423210	cg25471071	CNTN6	NM_014461	-0.113068	0.0398015
chr3	55508460	cg17553300	WNT5A	NM_003392	-0.105235	0.0398672
chr14	103018726	cg14218851			0.215341	0.0398972
chr1	156218113	cg03954786	PAQR6	NM_198406;NM_024897	0.239431	0.039903
chr12	52306101	cg14872074	ACVRL1	NM_000020;NM_001077401	-0.130233	0.039903
chr3	133606960	cg26335760	RAB6B	NM_016577	-0.109095	0.0399185
chr17	8301183	cg10218000	RNF222	NM_001146684	0.104417	0.0399185
chr6	31554829	cg27616007	LST1	NR_029461;NM_007161;NM_205839;NM_205838;NM_205840;NM_001166538;NR_029462;NM_205837	-0.140189	0.0399185
chr7	150018095	cg01601712	ACTR3C	NM_001164458	0.277471	0.0399185
chr1	160833560	cg11939496	CD244	NM_001166663;NM_016382;NM_001166664	-0.164049	0.0399185
chr10	126314798	cg07984614	FAM53B	NM_014661	0.10199	0.0399381
chr12	50099568	cg19014335	FMNL3	NM_198900;NM_175736	-0.114103	0.0399482
chr7	156741538	cg02413092	NOM1	NM_138400	-0.116918	0.0399952
chr8	144631887	cg00404280			0.124804	0.0399992
chr12	323242	cg03139377	SLC6A12	NM_001122847;NM_003044;NM_001122848;NM_001122848	-0.111759	0.0400092
chr17	1883179	cg27299033	RTN4RL1	NM_178568	0.10846	0.0400092
chr1	37856881	cg15927699			0.110453	0.0400092
chr1	19687988	cg24593138	CAPZB	NM_004930	0.117576	0.0400825
chr3	69370218	cg11377213	FRMD4B	NM_015123	-0.129347	0.0400825
chr6	3746570	cg19772161	C6orf145	NM_183373	-0.105211	0.0400874
chr22	50455653	cg12404590	TTLL8	NM_001080447	0.111508	0.0400927
chr2	102080674	cg05991009	RFX8	NM_001145664	-0.171559	0.0402321
chr1	31870508	cg09017001			-0.159398	0.0402321
chr17	3705765	cg11239575	ITGAE	NM_002208	-0.157583	0.0402321
chr13	30055092	cg05122437	MTUS2	NM_015233;NM_001033602	-0.158433	0.0402321
chr17	821621	cg02459042	NXN	NM_022463	-0.286198	0.0402633
chr7	47803072	cg17614506			0.137814	0.0402853
chr3	129800573	cg13799772	ALG1L2	NM_001136152	-0.125062	0.0402985
chr20	57583076	cg18245281	CTSZ	NM_001336	-0.126565	0.0402985
chr10	14650660	cg23379806	FAM107B	NM_031453	-0.134779	0.0403065
chr11	617140	cg00645579	IRF7	NM_004031;NM_001572;NM_031264;NM_004029;NM_021924	-0.131268	0.0403065
chr2	206525681	cg10552473			0.115218	0.0403463
chr2	145282262	cg17403397			-0.118952	0.0403784
chr1	228756789	cg18025438			0.273212	0.0404274
chr3	119349840	cg19699682			-0.147137	0.0404669
chr19	47839132	cg15361750	GPR77	NM_018485	-0.121892	0.0404669
chr5	150977390	cg11935041			-0.106863	0.0404669
chr16	2039391	cg27190967	SYNGR3	NM_004209	0.107716	0.0404669
chr11	75584802	cg15587792	UVRAG	NM_003369	-0.120583	0.0404669
chr1	234914480	cg10718614			-0.124372	0.0404669
chr8	655208	cg18332212	ERICH1	NM_207332	-0.101719	0.0404669
chr2	240171748	cg01114124	HDAC4	NM_006037	-0.143745	0.0404669
chr1	54821853	cg09890699	SSBP3	NM_001009955;NM_018070;NM_145716	-0.105809	0.0404669
chr1	25254129	cg03769939	RUNX3	NM_001031680;NM_004350	0.118967	0.0404669
chr16	57729107	cg09306696	CCDC135	NM_032269	-0.128691	0.0404669
chr1	36004549	cg13550410	KIAA0319L	NM_024874	0.106645	0.0404669
chr1	871546	cg24362661	SAMD11	NM_152486	0.111146	0.0404669
chr16	2737340	cg09866569	KCTD5	NM_018992	-0.113002	0.0404669
chr6	21832051	cg10126181	FLJ22536	NR_015410	-0.116033	0.0404669
chr10	557605	cg22737241	DIP2C	NM_014974	0.12611	0.040491
chr4	159092089	cg00547103	FAM198B	NM_001031700;NM_001128424;NM_016613	-0.111135	0.040491
chr1	27627058	cg27531366	WDTC1	NM_015023	-0.141779	0.040491
chr2	228331319	cg25996077			0.102849	0.040491
chr2	219235515	cg19701828			-0.155335	0.040491
chr6	108167599	cg01063280			-0.111175	0.0404966
chr17	72524918	cg07834069	CD300LB	NM_174892	-0.186222	0.0404966
chr2	208101334	cg02796279			-0.15225	0.0405625
chr17	77755547	cg17346145	CBX2	NM_005189;NM_032647	-0.112557	0.0405625
chr7	2059796	cg07027305	MAD1L1	NM_003550;NM_001013837;NM_001013836	-0.108915	0.0405625
chr14	69256888	cg08169020	ZFP36L1	NM_004926	0.214169	0.0405625
chr1	76254508	cg18376306	RABGGTB	NM_004582;NR_002748	0.100613	0.0405625
chr20	20694136	cg14083146	RALGAPA2	NM_020343	-0.107254	0.0405635
chr3	129146731	cg00218914	C3orf25	NM_207307	-0.111536	0.0405976
chr6	106441441	cg03942932			-0.119693	0.0406111
chr4	146841472	cg19116959	ZNF827	NM_178835	-0.127348	0.0406272
chr7	137620868	cg09271097	CREB3L2	NM_194071	-0.168669	0.0406493
chr17	9066686	cg14182517	NTN1	NM_004822	0.105065	0.0406561
chr6	28874702	cg05314350	TRIM27	NM_006510	-0.158173	0.0406563
chr17	1657676	cg18278729	SERPINF2	NM_000934;NM_001165921;NM_001165920	-0.120137	0.0406914
chr2	123819265	cg20178603			0.118403	0.0406914
chr13	49403484	cg17527195			0.106205	0.0406914
chr11	73096162	cg12959048	RELT	NM_152222;NM_032871	-0.114494	0.0406914
chr16	88566483	cg07598385	ZFPM1	NM_153813	-0.113912	0.0406914
chr9	136341915	cg13410614	SLC2A6	NM_001145099;NM_017585	-0.136101	0.0407794
chr9	140586201	cg01595717	EHMT1	NM_024757;NM_001145527	-0.105238	0.0407794
chr20	62708630	cg00759427	RGS19	NM_001039467;NM_005873	-0.110778	0.0407794
chr17	80545322	cg02116768	FOXK2	NM_004514	-0.131817	0.0408804
chr7	1545819	cg25541528			-0.143469	0.0409491
chr4	121991645	cg18728025	C4orf31	NM_024574	-0.121762	0.0409891
chr20	2855312	cg24983189	PTPRA	NM_002836;NM_080840	0.104105	0.0409891
chr1	1565541	cg00297832	MIB2	NM_001170687;NM_001170688;NM_080875;NM_001170689;NM_001170686;NR_033183	0.117011	0.0409891
chr1	50574517	cg26227005	ELAVL4	NM_001144777;NM_001144776;NM_021952;NM_001144775;NM_001144774	-0.12969	0.0409891
chr16	58769104	cg08987251	GOT2	NM_002080	-0.14293	0.0410094
chr8	102167694	cg20162696			-0.104657	0.0410179
chr5	95151391	cg02354658	GLRX	NM_001118890;NM_002064	-0.110602	0.0410228
chr6	36356162	cg07856975	ETV7	NM_016135	-0.134375	0.041087
chr20	58630390	cg25724895	C20orf197	NM_173644	-0.143288	0.041087
chr22	45609421	cg19942731	C22orf9	NM_001009880;NM_015264	-0.175497	0.041087
chr11	44087367	cg18265608	ACCS	NM_001127219;NM_032592	0.111693	0.0411117
chr5	178902699	cg04456916			-0.141455	0.0411117
chr7	32961866	cg06312985	RP9P	NR_003500	-0.165998	0.0411159
chr6	137619143	cg01357222			-0.156905	0.0411159
chr5	133436368	cg06851151			0.126216	0.0411257
chr9	138850547	cg13594542	UBAC1	NM_016172	-0.118057	0.0411285
chr6	31095913	cg11396628	PSORS1C1	NM_014068	0.104701	0.0412112
chr8	58056026	cg08219700			-0.19787	0.0412114
chr2	1843184	cg20846728	MYT1L	NM_015025	-0.166997	0.0412138
chr19	55838021	cg09470754	TMEM150B	NM_001085488	-0.124979	0.0412138
chr17	66251609	cg12332239	AMZ2	NM_001033569;NM_001033574;NM_001033572;NM_001033570;NM_001033571;NM_016627	-0.111227	0.0412305
chr16	8738304	cg08703231	C16orf68	NM_024109	-0.143561	0.041279
chr5	171541827	cg11334870	STK10	NM_005990	-0.164503	0.0413052
chr15	22915992	cg26889953	CYFIP1	NM_014608	-0.148456	0.0413168
chr16	57729104	cg01813965	CCDC135	NM_032269	-0.124496	0.0413337
chr17	33412186	cg10863207	RFFL	NM_057178	0.100612	0.0413337
chr2	8685893	cg08168141			-0.128407	0.0413508
chr17	943270	cg14236443	ABR	NM_021962;NM_001092;NM_001159746	-0.109934	0.0413508
chr4	186318356	cg26741686	ANKRD37	NM_181726	0.104789	0.0413508
chr8	22960177	cg18545076	TNFRSF10C	NM_003841	-0.113064	0.0413873
chr6	42931860	cg15632659	PEX6	NM_000287	0.113306	0.0415176
chr8	22497061	cg15942979	BIN3	NM_018688	0.108722	0.0416457
chr17	35851459	cg06716730	DUSP14	NM_007026	0.113902	0.0416642
chr7	2059921	cg15896696	MAD1L1	NM_003550;NM_001013837;NM_001013836	-0.137453	0.0417362
chr16	15146876	cg07456681	NTAN1	NM_173474	-0.116157	0.0417362
chr1	26869620	cg07785552	RPS6KA1	NM_002953	-0.146083	0.0417362
chr17	45944464	cg09243648			0.123464	0.0417362
chr15	29442040	cg13832135	FAM189A1	NM_015307	-0.105397	0.0417712
chr8	21905599	cg03025830	FGF17	NM_003867	-0.154712	0.0417712
chr19	39892799	cg24084564			0.100917	0.0418751
chr13	48574637	cg25340973	SUCLA2	NM_003850	0.120595	0.0419767
chr2	169769616	cg05703053			0.121293	0.0420041
chr1	9154254	cg16553238			-0.162335	0.0420426
chr10	31288287	cg25888881	ZNF438	NM_001143769;NM_001143768;NM_182755;NM_001143769;NM_001143767;NM_001143770;NM_001143766;NM_001143771;NR_026560	-0.112514	0.0421143
chr9	131643131	cg05715828	LRRC8A	NM_001127245;NM_004059;NM_001122672;NM_001122671;NM_019594	-0.124373	0.0421203
chr3	195897833	cg09393619			-0.160085	0.0421746
chr7	632926	cg16439394	PRKAR1B	NM_001164759;NM_001164762;NM_001164758;NM_001164760;NM_001164761;NM_002735	-0.102011	0.0421911
chr6	32182002	cg22155039	NOTCH4	NM_004557	-0.100642	0.0421911
chr10	90995297	cg09797463	LIPA	NM_001127605;NM_000235	-0.117716	0.0422188
chr14	23385384	cg04756491	RBM23	NM_001077351;NM_001077352;NM_018107	-0.176168	0.0422635
chr13	27842278	cg26885400			-0.12007	0.0422807
chr2	71132993	cg02187231	VAX2	NM_012476	-0.102592	0.0422886
chr11	115088660	cg11594811	CADM1	NM_001098517;NM_014333	0.112335	0.0422978
chr11	70650521	cg16312514	SHANK2	NM_012309	-0.11564	0.0422978
chr3	129318459	cg16850690	PLXND1	NM_015103	-0.124814	0.0422978
chr4	24801425	cg02891686	SOD3	NM_003102	-0.115565	0.0422988
chr16	85296220	cg06835772			-0.113615	0.0422988
chr11	69259957	cg09868299			-0.156266	0.042325
chr21	35884508	cg03801286	KCNE1	NM_000219	-0.155763	0.042325
chr3	39426101	cg10639933	SLC25A38	NM_017875	0.113946	0.0423334
chr9	211689	cg14500300			-0.10425	0.0423334
chr6	30301504	cg26229895	TRIM39	NM_172016;NM_021253	-0.114926	0.0423665
chr14	98444513	cg11798182	C14orf64	NR_015430	0.138657	0.0423665
chr19	7733883	cg02346997	RETN	NM_020415	-0.107751	0.0423665
chr11	47416109	cg23582982			-0.145122	0.0423665
chr12	2443169	cg03626208	CACNA1C	NM_001129844;NM_001129827;NM_001129839;NM_001129834;NM_001129841;NM_000719;NM_001129830;NM_001167625;NM_001129843;NM_001167624;NM_001129835;NM_001129837;NM_001167623;NM_001129840;NM_199460;NM_001129833;NM_001129832;NM_001129829;NM_001129846;NM_001129836;NM_001129838;NM_001129831;NM_001129842	-0.14351	0.0423665
chr2	25321917	cg00483217	EFR3B	NM_014971	-0.136265	0.0423769
chr11	113845638	cg24134767	HTR3A	NM_000869;NM_213621	0.105716	0.0423922
chr19	7767584	cg05641903	FCER2	NM_002002	-0.106421	0.0425603
chr12	56690194	cg16268734	CS	NM_004077	-0.173101	0.0425603
chr18	77723226	cg16313807	HSBP1L1	NM_001136180	0.173805	0.0425728
chr5	140763254	cg16505764	PCDHGA4	NM_018917;NM_032087;NM_018919;NM_018912;NM_018918;NM_018922;NM_018916;NM_018915;NM_018923;NM_018920;NM_018924	0.140033	0.0425728
chr22	30476345	cg23268208	HORMAD2	NM_152510	-0.100103	0.042664
chr15	83879539	cg21238234			0.109851	0.0426794
chr10	49892930	cg15164194	WDFY4	NM_020945	-0.134732	0.0426832
chr6	31554848	cg14324675	LST1	NR_029461;NM_007161;NM_205839;NM_205838;NM_205840;NM_001166538;NR_029462;NM_205837	-0.119423	0.0426977
chr11	104972907	cg17008031	CASP1	NM_033294;NM_001223;NM_033292;NM_033295;NM_033293;NM_001007232	-0.129215	0.0426977
chr3	5065165	cg26284735			0.114105	0.0426977
chr11	68096138	cg24051242	LRP5	NM_002335	-0.119491	0.0427114
chr3	121796767	cg13069531	CD86	NM_006889;NM_175862;NM_006889	-0.114274	0.0427114
chr11	45671369	cg01425746	CHST1	NM_003654	-0.10856	0.0428028
chr11	47399994	cg14088811	SPI1	NM_001080547;NM_003120;NM_001080547;NM_003120	-0.139207	0.042805
chr17	37808339	cg03572260	STARD3	NM_006804;NM_001165937;NM_001165938	-0.152886	0.0428742
chr6	168743593	cg15977685			0.101055	0.0429326
chr8	101315498	cg13675051	RNF19A	NM_183419;NM_015435	-0.140202	0.0429584
chr12	113799660	cg00859441	PLBD2	NM_001159727;NM_173542	-0.196754	0.0429584
chr17	3819363	cg25031824	P2RX1	NM_002558	-0.18459	0.0430583
chr7	4244372	cg24441899	SDK1	NR_027816;NM_152744	-0.143148	0.0431284
chr22	43542604	cg18437319			-0.103707	0.0431362
chr6	41907198	cg05568549	CCND3	NM_001136017;NM_001136125;NM_001136126;NM_001760	-0.108441	0.0432729
chr17	19976435	cg08463297			-0.142744	0.0432729
chr9	136567339	cg13458384	SARDH	NM_001134707;NM_007101	0.109413	0.0432729
chr11	313354	cg11694510	IFITM1	NM_003641	0.105028	0.043289
chr12	4398508	cg27317813	CCND2	NM_001759	-0.11682	0.0433869
chr11	60414689	cg17588350	C11orf64	NR_026946	-0.11075	0.0433895
chr10	134149366	cg21350697	LRRC27	NM_001143757;NM_030626;NM_001143759;NM_001143758;NR_026559	-0.162126	0.0434073
chr12	104676774	cg15775217	TXNRD1	NM_001093771	-0.213776	0.0434073
chr12	133016446	cg22882902			-0.115255	0.0434222
chr11	66883117	cg13980609			-0.118865	0.0435075
chr13	50570018	cg09145126	TRIM13	NM_005798;NM_001007278;NM_213590;NM_052811;NR_002612	-0.15327	0.0435502
chr9	35618412	cg12971694	CD72	NM_001782;NM_001782	-0.13703	0.0435653
chr5	140517411	cg25205438	PCDHB5	NM_015669;NM_015669	0.127275	0.0436107
chr17	74067713	cg07166266	SRP68	NM_014230	0.106467	0.0436107
chr15	50148234	cg16762030			-0.158066	0.0436107
chr7	6435978	cg11796827	RAC1	NM_018890;NM_006908	-0.105014	0.0436478
chr12	111845176	cg11714320	SH2B3	NM_005475	-0.117876	0.0436478
chr10	16949821	cg25469714	CUBN	NM_001081	-0.107852	0.0437112
chr11	117698911	cg22335223	FXYD2	NM_021603	0.136763	0.0437625
chr4	183721183	cg22051345	ODZ3	NM_001080477	-0.110654	0.0438301
chr1	15711443	cg00970752	FHAD1	NM_052929	-0.138416	0.0438348
chr8	28961356	cg09322573	KIF13B	NM_015254	-0.127001	0.0438348
chr21	35016873	cg16452651	ITSN1	NM_003024;NM_001001132	-0.178097	0.0438348
chr1	158149228	cg13765621	CD1D	NM_001766	-0.102944	0.0438348
chr10	134311114	cg16943126			-0.131309	0.0438348
chr7	104945248	cg15857470	SRPK2	NM_182692	0.139177	0.0438348
chr3	52529195	cg21445366	STAB1	NM_015136	-0.107396	0.0438348
chr1	25251730	cg03961551	RUNX3	NM_001031680;NM_004350	0.130493	0.0438348
chr10	3291355	cg08575883			0.100319	0.0438367
chr10	3792283	cg09455513			-0.119878	0.0438379
chr6	33090304	cg00047553	HLA-DPB2	NR_001435	0.122112	0.0438457
chr17	75451779	cg02442640	2022-09-09	NM_001113492;NM_001113496;NM_001113493;NM_001113491;NM_006640;NM_001113494	0.112349	0.0438462
chr8	101315505	cg01596292	RNF19A	NM_183419;NM_015435	-0.101428	0.0438462
chr5	132232586	cg22212250	AFF4	NM_014423	0.108538	0.0438516
chr4	38859770	cg14578677	TLR6	NM_006068	-0.171238	0.0438516
chr5	139138880	cg15168577			-0.11092	0.043935
chr15	43531947	cg25875049	TGM5	NM_201631;NM_004245	-0.104687	0.0439372
chr6	9399379	cg20876760			-0.123906	0.0439529
chr3	195576390	cg15729578			0.124109	0.0439529
chr10	113987401	cg24103651			-0.117518	0.0439636
chr13	88328274	cg24626752	SLITRK5	NM_015567	-0.102866	0.0440413
chr12	47353065	cg18468917			0.152428	0.0440587
chr2	192476634	cg03022510			-0.138834	0.0440597
chr11	125120940	cg20997661	PKNOX2	NM_022062	-0.146934	0.0440855
chr10	93861824	cg26426690	CPEB3	NM_014912	0.127638	0.044098
chr2	164205343	cg04319873			-0.117324	0.044098
chr13	22243030	cg12261451			-0.107378	0.0441216
chr6	408730	cg16478536	IRF4	NM_002460	-0.117991	0.0441216
chr6	41169171	cg12045237	TREML2	NM_024807	-0.110917	0.0441216
chr3	156784781	cg15697575			0.110543	0.0441455
chr14	95973710	cg16405432			-0.151797	0.0442096
chr5	10457079	cg23275644	ROPN1L	NM_031916	-0.106474	0.0442096
chr16	19126242	cg02047547	ITPRIPL2	NM_001034841;NR_028028	0.112378	0.0442096
chr5	140733385	cg01575930	PCDHGA2	NM_018915;NM_032053;NM_018912;NM_018917;NM_018922;NM_018916	0.118404	0.0442096
chr1	40098595	cg00034101	HEYL	NM_014571	0.103278	0.0442617
chr4	57623913	cg21399203			0.138909	0.0442899
chr3	45077649	cg00347798			-0.1242	0.0443082
chr2	200604022	cg14652227			-0.103869	0.0443231
chr17	76588724	cg24439686			-0.108231	0.0443231
chr1	228337311	cg01789576	GJC2	NM_020435	0.110528	0.0443792
chr6	163757048	cg07567256			-0.139596	0.0444201
chr15	70432547	cg04147969			0.129722	0.0444574
chr6	31510729	cg03031988	BAT1	NM_004640;NM_080598	0.118363	0.0444574
chr7	99970502	cg13650156	PILRA	NM_178273;NM_178272;NM_013439	-0.106854	0.0444784
chr1	153330758	cg16139316	S100A9	NM_002965	-0.152519	0.0445482
chr16	85062881	cg07165260	KIAA0513	NM_014732	0.137751	0.0445482
chr6	118903047	cg14109551	C6orf204	NM_206921;NM_001042475	-0.103903	0.0445482
chr15	74229671	cg18106898	LOXL1	NM_005576	-0.101618	0.0445482
chr7	157647224	cg24842334	PTPRN2	NM_002847;NM_130842;NM_130843	-0.130478	0.0445482
chr2	136872067	cg23374992	CXCR4	NM_001008540;NM_001008540;NM_003467	-0.113807	0.0445482
chr5	149867965	cg12636435			-0.179101	0.0445482
chr7	43690247	cg23007665	C7orf44	NM_018224	0.107352	0.0445646
chr2	88327530	cg04195125	KRCC1	NM_016618	-0.149911	0.0445659
chr12	122669186	cg08120831	LRRC43	NM_152759;NM_001098519	-0.124173	0.0445659
chr19	51220392	cg18589960	SHANK1	NM_016148	0.138809	0.0445659
chr11	70433293	cg17222829	SHANK2	NM_012309;NM_133266	-0.16205	0.0445659
chr6	31695552	cg03900314	DDAH2	NM_013974	-0.12069	0.0445671
chr10	90013989	cg08419450			0.103433	0.0445959
chr7	2760784	cg23779604			0.215631	0.0446224
chr17	42357520	cg21850518			-0.133836	0.0446395
chr12	58120011	cg23387569	AGAP2	NM_014770;NR_027032;NM_001122772	0.102283	0.0446697
chr2	38831166	cg18107006	HNRPLL	NM_001142650;NM_138394	-0.136605	0.0447765
chr17	74639731	cg15503752	ST6GALNAC1	NM_018414;NM_018414	0.102862	0.0447849
chr5	448790	cg17500228	EXOC3	NM_007277	-0.169422	0.0447851
chr2	54832147	cg09404516	SPTBN1	NM_178313;NM_003128	-0.106567	0.0448569
chr19	46526675	cg24917775	PGLYRP1	NM_005091	-0.107005	0.0448646
chr11	394289	cg18011064	PKP3	NM_007183;NM_007183	0.101879	0.0448651
chr16	79802467	cg09267773			0.120817	0.0448651
chr12	66582582	cg01183510	IRAK3	NM_007199;NM_001142523	-0.141109	0.0448802
chr3	46263244	cg26763945			-0.12904	0.0448802
chr5	9596893	cg24656596			0.108851	0.0448849
chr18	21572748	cg17205313	TTC39C	NM_153211;NM_153211	0.1034	0.0448849
chr1	143651192	cg24884343			0.10647	0.0448849
chr17	17874183	cg04702509	TOM1L2	NM_001033551;NM_001082968	0.103662	0.0448849
chr11	1769443	cg02916272	HCCA2	NM_053005;NM_001170820	0.105439	0.0448906
chr19	41086247	cg27372422	SHKBP1	NM_138392	-0.135281	0.0449395
chr16	84628969	cg03738384	COTL1	NM_021149	0.105117	0.0449395
chr6	30039013	cg24637044	RNF39	NM_170769;NM_025236	-0.106441	0.0449617
chr16	1353627	cg06908857			0.107387	0.0449617
chr1	33608053	cg12386614			-0.292024	0.0450238
chr11	47400146	cg03565868	SPI1	NM_001080547;NM_003120	-0.140611	0.0450691
chr6	36665620	cg05569131			-0.125414	0.0450978
chr14	69256677	cg01424562	ZFP36L1	NM_004926	0.106227	0.0451305
chr2	8686087	cg00534022			-0.133131	0.0451305
chr17	5138259	cg18445108	C17orf87	NM_207103	-0.142693	0.0451305
chr9	139424152	cg00407944	NOTCH1	NM_017617	-0.120125	0.0451503
chr15	90380258	cg23007087	AP3S2	NM_005829;NR_023361	-0.145129	0.0451503
chr7	72651564	cg22581364			-0.16309	0.0451626
chr6	31582837	cg24211388	AIF1	NM_032955;NM_001623;NM_004847	-0.165639	0.0451927
chr14	69091453	cg13067714			-0.111811	0.0451927
chr17	38499096	cg05824218	RARA	NM_001024809;NM_001145301;NM_000964;NM_001145302	-0.122112	0.0452378
chr12	123753272	cg20181887	CDK2AP1	NM_004642	-0.157811	0.0452378
chr7	1545815	cg06902025			-0.106669	0.0452378
chr17	14215442	cg09914404	HS3ST3B1	NM_006041	-0.125094	0.0452378
chr20	48774608	cg16427387			0.126094	0.0452378
chr10	49892943	cg27459529	WDFY4	NM_020945	-0.126446	0.0452378
chr19	8117024	cg02901006	CCL25	NM_005624	-0.106711	0.0452378
chr8	103937374	cg19589396			0.105378	0.0452378
chr16	5020147	cg07140894	SEC14L5	NM_014692	0.107309	0.045245
chr1	204452127	cg20828284	PIK3C2B	NM_002646	-0.231354	0.045245
chr16	57701455	cg08368934	GPR97	NM_170776	-0.153862	0.045245
chr8	131347294	cg09376835	ASAP1	NM_018482	-0.16878	0.0452455
chr10	46912902	cg16311364	FAM35B	NR_027632	-0.107647	0.0452455
chr7	5709854	cg24534583	RNF216	NM_207111;NM_207116	-0.158355	0.045252
chr16	28584802	cg07866632	CCDC101	NM_138414	-0.126871	0.0452724
chr10	70321959	cg10403849	TET1	NM_030625	-0.114747	0.0453064
chr1	161184305	cg20609803	FCER1G	NM_004106	-0.163171	0.045339
chr17	75446431	cg20772590	2022-09-09	NM_001113496;NM_001113492;NM_001113493;NM_001113491;NM_006640;NM_001113494	0.12146	0.045339
chr8	98610472	cg04264433			-0.124806	0.045339
chr1	245273257	cg24524470	EFCAB2	NR_026587;NM_001143943;NR_026586	-0.140949	0.045339
chr1	111733668	cg15591803	DENND2D	NM_024901	-0.109517	0.045339
chr2	43041125	cg18739675			-0.13102	0.045339
chr19	54761178	cg03688987	LILRB5	NM_006840;NM_001081443;NM_001081442	-0.11944	0.045339
chr1	55014160	cg01802772	ACOT11	NM_015547;NM_147161	0.297784	0.045339
chr2	207847811	cg12449916			-0.140297	0.045339
chr6	32904317	cg10411221	HLA-DMB	NM_002118	-0.12698	0.045339
chr11	76340765	cg20430631			-0.17395	0.0453473
chr5	12176144	cg16142488			0.102033	0.0453582
chr9	137662926	cg13596370	COL5A1	NM_000093	-0.125111	0.0453685
chr1	150132950	cg19736900			-0.112195	0.0453968
chr6	42892994	cg05586134	PTCRA	NM_138296	0.104583	0.0453971
chr6	151258520	cg15044453	MTHFD1L	NM_015440	-0.196021	0.0453971
chr6	36922415	cg17066531	PI16	NM_153370;NM_153370	-0.143148	0.0454227
chr18	74845829	cg16604566	MBP	NM_001025100;NM_001025101	-0.134666	0.0454227
chr19	52203721	cg24481841	NCRNA00085	NR_024330	0.103844	0.0454898
chr10	49892954	cg20504007	WDFY4	NM_020945	-0.136027	0.0455128
chr1	224357281	cg17156011			-0.129311	0.0455414
chr7	64300061	cg04462931			-0.226655	0.0455414
chr11	46389249	cg12856521	DGKZ	NM_001105540;NM_201533;NM_003646;NM_201532	0.203594	0.0455414
chr13	25320388	cg11626496			-0.111331	0.0455414
chr2	108994528	cg05036173	SULT1C4	NM_006588;NM_006588	-0.127207	0.0455414
chr22	26831446	cg16692439	ASPHD2	NM_020437	-0.12516	0.0455414
chr1	59043280	cg01821018	TACSTD2	NM_002353	0.18783	0.0455414
chr3	112486072	cg17086773			-0.143658	0.0455744
chr19	52005176	cg13981787	SIGLEC12	NM_053003	-0.10164	0.0456055
chr2	43278552	cg09988805			0.129908	0.0456316
chr11	89225014	cg24750308	NOX4	NM_001143836;NM_016931;NM_001143837;NR_026571	-0.112551	0.0456316
chr17	78560478	cg08129331	RPTOR	NM_001163034;NM_020761	-0.124522	0.0456316
chr5	32734568	cg13299698	NPR3	NM_000908	-0.104525	0.0456316
chr20	19952018	cg24446326	RIN2	NM_018993	-0.115826	0.0457688
chr8	143359068	cg08672916	TSNARE1	NM_145003	-0.101936	0.0457856
chr1	248016378	cg17127183			-0.107636	0.0457927
chr5	92914036	cg11853830	FLJ42709	NR_021490;NR_021491	-0.120123	0.0457938
chr12	25844221	cg07643696			-0.154801	0.0457938
chr14	21359295	cg21099111	RNASE3	NM_002935	-0.167295	0.0457938
chr3	151058837	cg14191476	P2RY12	NM_176876;NM_053002;NM_022788	-0.101158	0.0457938
chr22	30476285	cg21843594	HORMAD2	NM_152510	-0.100795	0.0457938
chr2	70312615	cg19638749			0.126552	0.0457938
chr11	68142234	cg21746120	LRP5	NM_002335	-0.114529	0.0457938
chr2	238578376	cg08063160	LRRFIP1	NM_001137550	0.129208	0.0457938
chr1	235091106	cg20155035			-0.100685	0.0457938
chr19	1271307	cg02281970	C19orf23	NR_027271;NR_023313;NR_023312;NM_001280	0.104106	0.0457938
chr7	2774414	cg11884933	GNA12	NM_007353	-0.144764	0.0457938
chr9	97402452	cg14211930	FBP1	NM_001127628;NM_001127628;NM_000507	-0.115544	0.0457938
chr19	54876664	cg24147838	LAIR1	NM_021706;NM_021706;NM_002287;NM_002287	-0.129352	0.0457938
chr18	21572656	cg18719665	TTC39C	NM_153211	0.101499	0.0457963
chr4	140684596	cg16596440	MAML3	NM_018717	-0.127844	0.0457963
chr6	134497755	cg08239804	SGK1	NM_001143678;NM_001143676;NM_001143677	-0.120608	0.0458621
chr14	21423837	cg03505225	RNASE2	NM_002934	-0.108784	0.0458944
chr14	25046121	cg24777950	CTSG	NM_001911	-0.180323	0.0459419
chr16	86016387	cg08215318			-0.163142	0.0459443
chr7	5648122	cg25714865			0.168712	0.0459443
chr12	122658897	cg24271203	IL31	NM_001014336;NM_152759	0.107032	0.045946
chr8	128888486	cg23295629	PVT1	NR_003367	0.117746	0.0460288
chr7	47537004	cg27574991	TNS3	NM_022748	-0.134895	0.0460288
chr17	79785991	cg21659714	FAM195B	NM_207368;NM_001093767	0.120898	0.0460288
chr20	44048174	cg21723559	PIGT	NM_015937	0.104147	0.046034
chr8	145641996	cg07933378	SLC39A4	NM_130849;NM_017767	0.117131	0.046034
chr9	97405553	cg13573745			-0.120718	0.046034
chr2	168042982	cg10633051	XIRP2	NM_152381;NM_001079810	-0.103566	0.046034
chr7	2444534	cg10152449	CHST12	NM_018641	-0.135355	0.046034
chr11	71846788	cg25634666	FOLR3	NM_000804;NM_000804	-0.144059	0.046034
chr22	47609321	cg13041894			-0.102413	0.046034
chr16	3136857	cg08937107			-0.114486	0.046034
chr2	202949183	cg17534916			0.102336	0.046034
chr6	44796705	cg08493590	SUPT3H	NM_181356	-0.104504	0.046034
chr1	25257566	cg24019564	RUNX3	NM_004350;NM_001031680	0.104319	0.046034
chr9	127274614	cg14509153			-0.112695	0.046034
chr3	195995846	cg21470711	PCYT1A	NM_005017	-0.125043	0.046034
chr11	121301233	cg06980932			-0.110604	0.046034
chr1	154164994	cg16586406	TPM3	NM_152263	-0.121009	0.046034
chr6	32820214	cg26234900	TAP1	NM_000593	0.112005	0.046034
chr1	207277581	cg26430305	C4BPA	NM_000715	-0.104176	0.046034
chr17	75096202	cg20610950			-0.145264	0.046034
chr12	56236869	cg03509949	MMP19	NM_002429	-0.102292	0.046034
chr8	129263509	cg00618309			-0.114323	0.046034
chr3	37239890	cg11321190			0.10384	0.0460426
chr7	1004997	cg21511321	COX19	NM_001031617	-0.125257	0.0460472
chr14	67983484	cg14198221	TMEM229B	NM_182526	-0.100019	0.0460472
chr3	71626654	cg25811633	FOXP1	NM_032682;NM_001012505	-0.147158	0.0460951
chr16	30108404	cg27087781	YPEL3	NM_031477;NM_001145524	-0.131821	0.0461316
chr2	152006936	cg07092896			-0.109637	0.0461945
chr6	167012092	cg23002590	RPS6KA2	NM_021135;NM_001006932	-0.153039	0.0462303
chr6	31093913	cg01966425	PSORS1C1	NM_014068	0.116708	0.0462303
chr7	26902685	cg00328376	SKAP2	NM_003930	-0.114973	0.0463151
chr1	2454705	cg24955743	PANK4	NM_018216	0.149209	0.0463417
chr7	5258428	cg05639533	WIPI2	NM_016003;NM_001033519;NM_015610;NM_001033520;NM_001033518	-0.114074	0.0463417
chr22	40573076	cg25276892	TNRC6B	NM_001024843;NM_001162501;NM_015088	0.115856	0.0463433
chr14	101922290	cg01225004			-0.197809	0.0463433
chr17	3819339	cg22044342	P2RX1	NM_002558	-0.162745	0.0463433
chr9	95897313	cg13538006	NINJ1	NM_004148	0.107212	0.0463558
chr8	36957379	cg20893180			-0.103846	0.0463666
chr10	3138505	cg26644674	PFKP	NM_002627	-0.15706	0.0464883
chr16	8806756	cg00220102	ABAT	NM_020686;NM_000663	0.115628	0.0464883
chr13	111318022	cg14677983	CARS2	NM_024537	-0.123544	0.0464883
chr7	47560215	cg07488141	TNS3	NM_022748	-0.184966	0.0464883
chr19	10958952	cg01581222	C19orf38	NM_001136482	-0.102804	0.0464883
chr18	44677553	cg17192377	HDHD2	NM_032124	0.110026	0.0464883
chr12	51403056	cg14688905	SLC11A2	NM_000617	-0.112889	0.0464883
chr12	27925367	cg04279139	LOC100133893	NM_001146221	0.112907	0.0465591
chr9	139247374	cg14040131	GPSM1	NM_001145638;NM_001145639	0.129574	0.0466137
chr1	2948512	cg00169776			0.113241	0.0466137
chr20	21682505	cg08736638			-0.113448	0.0466137
chr5	54518208	cg00865849			-0.102488	0.0466268
chr1	17634713	cg21295838	PADI4	NM_012387;NM_012387	-0.10369	0.0466389
chr18	60903834	cg08223235	BCL2	NM_000633	-0.136951	0.0466501
chr14	96283686	cg21865751			0.103768	0.0467064
chr9	139644102	cg13544075	LCN6	NM_198946	-0.125106	0.0467064
chr16	14397892	cg03295417	MIR193B	NR_030177	-0.107912	0.0467064
chr11	7110196	cg20838586	RBMXL2	NM_014469;NM_014469	-0.118486	0.0467064
chr16	28517278	cg17122311	IL27	NM_145659	-0.108059	0.0467064
chr20	57583195	cg09315134	CTSZ	NM_001336	-0.124838	0.0467064
chr20	3778655	cg14165142	CDC25B	NM_021873;NM_004358;NM_021872	0.121765	0.0467064
chr3	46244099	cg10499974	CCR1	NM_001295	-0.120148	0.0467064
chr22	22290866	cg01800253	PPM1F	NM_014634	-0.131129	0.0467461
chr11	64635774	cg07019638	EHD1	NM_006795	0.10658	0.0467487
chr12	53995504	cg02157894	ATF7	NM_001130060;NM_001130059;NM_006856	-0.113301	0.0467521
chr2	161077747	cg04737150			0.107986	0.0467525
chr1	192515127	cg24602411			-0.161578	0.0467525
chr11	129766154	cg27255275	NFRKB	NM_001143835	-0.125888	0.0467525
chr1	234977572	cg02889973			-0.132816	0.0467525
chr2	150426294	cg00833344	MMADHC	NM_015702	0.119403	0.0467607
chr2	25110049	cg25562925	ADCY3	NM_004036	-0.105828	0.0467621
chr10	30351259	cg19223064			-0.16518	0.0467621
chr12	54413101	cg00567703	HOXC4	NM_014620;NR_003084;NM_153693	-0.126214	0.0467621
chr14	105391018	cg15352829	PLD4	NM_138790	-0.132642	0.0467621
chr13	36918614	cg25179758	SPG20	NM_001142296;NM_001142294;NM_015087;NM_001142295	-0.108539	0.0467621
chr3	150996563	cg09571369	MED12L	NM_053002;NM_014879	-0.103112	0.0467621
chr11	1507020	cg20737909	HCCA2	NM_053005	0.149365	0.0467621
chr7	968552	cg05904016	ADAP1	NM_006869	-0.14819	0.0467621
chr2	99872119	cg05043910	LYG2	NM_175735	-0.202596	0.0467621
chr14	51342320	cg21052932	ABHD12B	NM_181533;NM_181814	0.118481	0.0467621
chr12	52799285	cg02418195	KRT82	NM_033033	-0.133982	0.0467621
chr11	3855821	cg18456508	RHOG	NM_001665	-0.106668	0.0467621
chr11	121460973	cg20069407	SORL1	NM_003105	-0.109974	0.0467848
chr10	13913931	cg22959742	FRMD4A	NM_018027	-0.110682	0.0468131
chr7	151547969	cg04058799	PRKAG2	NM_016203	-0.132808	0.0468327
chr3	142316082	cg20824294	PLS1	NM_001145319	0.106074	0.046852
chr1	57785036	cg23691223	DAB1	NM_021080	0.120697	0.0468659
chr1	161091682	cg17013990	DEDD	NM_032998;NM_001039711;NM_001039712	-0.160636	0.0468757
chr14	25046117	cg01697902	CTSG	NM_001911	-0.169458	0.0468757
chr20	30948211	cg01377358	ASXL1	NM_015338;NM_001164603	0.112714	0.0468757
chr5	1514077	cg26668042	LPCAT1	NM_024830	-0.174132	0.0468781
chr6	36665611	cg12926693			-0.13419	0.0468815
chr10	29273678	cg16127514			0.1174	0.0468815
chr17	34641309	cg07778180	CCL4L1	NM_001001435;NM_207007	-0.126251	0.0469721
chr1	47051752	cg01440934	MKNK1	NR_024174;NM_003684;NR_024176;NM_001135553;NM_198973	-0.14933	0.0469845
chr9	123850279	cg21492378	CEP110	NM_007018	-0.155492	0.0469974
chr14	93539613	cg19011001	ITPK1	NM_001142593;NM_014216;NM_001142594	-0.145267	0.0469974
chr17	64787379	cg05115424	PRKCA	NM_002737	-0.11529	0.0470017
chr1	12404945	cg06620723	VPS13D	NM_015378;NM_018156	-0.132335	0.0470017
chr18	60904328	cg25059899	BCL2	NM_000633	-0.110681	0.0470077
chr12	123009494	cg23029597	RSRC2	NM_198262;NM_198261;NM_023012	0.102247	0.0470257
chr22	37572916	cg03171478			-0.137144	0.0470257
chr17	3674649	cg11011533	ITGAE	NM_002208	0.160124	0.0470257
chr1	12186079	cg10058766	TNFRSF8	NM_152942;NM_152942;NM_001243	-0.110553	0.0470257
chr16	30616649	cg07000116	ZNF689	NM_138447	-0.181486	0.0470257
chr15	86222553	cg08898492	AKAP13	NM_007200;NM_144767;NM_006738	-0.109342	0.0470937
chr6	33151512	cg20631997	COL11A2	NM_080679;NM_080681;NM_080680	-0.103246	0.0470937
chr12	114724257	cg04672622			0.120403	0.0470937
chr17	77755965	cg14421700	CBX2	NM_005189;NM_032647	-0.132685	0.0470937
chr17	26517057	cg08473752	NLK	NM_016231	-0.131901	0.0471531
chr2	191276183	cg04144521	MFSD6	NM_017694	-0.130783	0.0471531
chr17	72527607	cg14075731	CD300LB	NM_174892;NM_174892	-0.120786	0.0471775
chr6	30624467	cg09379497	DHX16	NM_001164239;NM_003587	-0.152938	0.0472303
chr5	9547595	cg04096619	SNORD123	NR_003689;NM_003966	0.104418	0.0472303
chr6	33280424	cg26083458	TAPBP	NM_172209;NM_003190;NM_172208	0.108535	0.0472303
chr16	85608058	cg00835825			-0.120278	0.0472303
chr17	79652389	cg08782899	ARL16	NM_001040025;NM_004712	0.125094	0.0472303
chr21	38351195	cg04126652	HLCS	NM_000411	-0.104175	0.0472329
chr12	124865130	cg00765705	NCOR2	NM_006312;NM_001077261	-0.148951	0.0472466
chr6	90845852	cg27644327	BACH2	NM_021813;NM_001170794	-0.150196	0.0472512
chr7	139426030	cg10271819	HIPK2	NM_001113239;NM_022740	-0.13991	0.0472598
chr4	124180616	cg19782686	SPATA5	NM_145207	-0.127777	0.0472889
chr3	155421970	cg18623216	PLCH1	NM_014996;NM_014996	-0.107898	0.0472895
chr16	85343281	cg00036976			-0.102873	0.0472895
chr11	74860985	cg18589858	SLCO2B1	NM_007256;NM_001145212	-0.109401	0.047309
chr8	21996546	cg09539908	REEP4	NM_025232	-0.154187	0.047309
chr1	2840308	cg21943117			0.101387	0.04733
chr7	140043078	cg01012242	SLC37A3	NM_207113;NM_032295	-0.118417	0.0474279
chr13	25320133	cg19937061			-0.12808	0.0474279
chr15	83777051	cg25045893	TM6SF1	NM_023003;NM_001144903	-0.101371	0.0474293
chr9	139221076	cg13683534	GPSM1	NM_001145638;NM_015597;NR_026964	-0.124513	0.0474322
chr1	32731477	cg16348358	LCK	NM_005356	-0.107775	0.0474322
chr1	6269260	cg15731815	RNF207	NM_207396	-0.109663	0.0474684
chr12	57382283	cg26545245			-0.129002	0.0474728
chr14	74238381	cg26217402	C14orf43	NM_001043318	0.144165	0.0474834
chr6	110503093	cg08060645	CDC40	NM_015891	-0.123278	0.0474834
chr1	175642761	cg26359730	TNR	NM_003285	0.108243	0.0474913
chr7	5271655	cg00393985	WIPI2	NM_016003;NM_001033520;NM_001033519;NM_015610;NM_001033518	-0.140187	0.0475056
chr16	31271642	cg00833777	ITGAM	NM_001145808;NM_000632	-0.118808	0.0475404
chr16	50347895	cg03485674	ADCY7	NM_001114	-0.119775	0.0475404
chr11	117695828	cg15929395	FXYD2	NM_021603;NM_001127489;NM_001680	-0.118567	0.0475522
chr15	44085947	cg14184693	SERF2	NM_001018108;NR_031695	-0.104983	0.0475743
chr16	29675846	cg23083984	SPN	NM_001030288;NM_003123	-0.10347	0.0476001
chr12	51890999	cg21422475	SLC4A8	NM_001039960;NM_004858	-0.128924	0.0476151
chr11	47633146	cg18512352			-0.117754	0.0476151
chr11	70650456	cg16069986	SHANK2	NM_012309	-0.113954	0.0476151
chr17	56612362	cg06551697			-0.130055	0.0476151
chr16	69499075	cg04406620	CYB5B	NM_030579	0.119789	0.0476151
chr8	21961713	cg03520938	FAM160B2	NM_022749	0.106472	0.0476151
chr10	96143568	cg10751070			-0.151649	0.0476151
chr16	85292322	cg02978505			-0.203723	0.0476151
chr2	62445279	cg25521400	B3GNT2	NM_006577	-0.158165	0.0476151
chr2	238533299	cg20513777			-0.141066	0.0476151
chr2	75059602	cg18638581	HK2	NM_000189	-0.12941	0.0476151
chr7	150674012	cg02363526	KCNH2	NM_172056;NM_000238	-0.101077	0.0476887
chr8	144358566	cg14825413	GLI4	NM_138465	0.110918	0.0477127
chr19	50019310	cg11263420	FCGRT	NM_001136019;NM_004107	-0.105702	0.0477204
chr10	126411663	cg04516672	FAM53B	NM_014661	0.116321	0.0477259
chr14	69256690	cg06617636	ZFP36L1	NM_004926	0.109177	0.0477271
chr17	80561982	cg23628350	FOXK2	NM_004514	-0.163904	0.0477677
chr17	7529693	cg01479396	SHBG	NR_027463;NM_133491	-0.143235	0.0477677
chr14	38092080	cg24169669			-0.115302	0.0477677
chr14	21485900	cg16409562	NDRG2	NM_016250;NM_201535;NM_201538;NM_201541;NM_201540;NM_201539;NM_201537;NM_201536	-0.104731	0.047801
chr1	60158474	cg19746186	FGGY	NM_018291;NM_001113411	-0.127198	0.047896
chr4	15691786	cg02353916	LOC285550	NM_001145191	-0.149063	0.0479048
chr11	121507724	cg01861537			-0.162021	0.0479404
chr15	22915986	cg06107293	CYFIP1	NM_014608	-0.153105	0.0479497
chr1	112057879	cg10376161	ADORA3	NM_001081976	-0.13324	0.0479567
chr17	998711	cg02135245	ABR	NM_021962;NM_001092;NM_001159746	-0.101562	0.0479567
chr2	43081481	cg22707446			0.111042	0.0479804
chr9	133871033	cg21228270			-0.119729	0.0479927
chr7	968194	cg00904258	ADAP1	NM_006869	-0.140725	0.0479927
chr1	9154250	cg17952939			-0.167829	0.0479927
chr6	167047842	cg10647833	RPS6KA2	NM_001006932	-0.136648	0.0479927
chr3	137938348	cg04554122	ARMC8	NM_213654;NM_015396;NM_014154	-0.107839	0.0479927
chr12	54778750	cg09457245	ZNF385A	NM_001130968;NM_001130967;NM_015481	-0.121883	0.0479983
chr19	14785593	cg07072643	EMR3	NM_032571;NM_032571	-0.110857	0.0480313
chr7	130372419	cg02332073	TSGA13	NM_052933	-0.133667	0.0480588
chr7	98718683	cg24407596	SMURF1	NM_020429;NM_181349	-0.12408	0.0480588
chr12	65672052	cg15175129	MSRB3	NM_198080;NM_001031679	-0.101218	0.0480588
chr20	61002657	cg06154311	C20orf151	NM_080833	0.139602	0.0480588
chr15	22546908	cg15335669			-0.110983	0.0480728
chr3	188425256	cg25853622	LPP	NM_005578;NM_001167671;NM_001167672	-0.15112	0.0480728
chr8	145728203	cg16587265	GPT	NM_005309	0.111766	0.048122
chr2	134933179	cg21221263			-0.144536	0.0481273
chr1	90309998	cg11839020	LRRC8D	NM_018103;NM_001134479	0.115639	0.0481388
chr19	2607757	cg23463608	GNG7	NM_052847	0.136961	0.0481874
chr3	10336053	cg05844788	GHRL	NM_001134946;NR_024137;NM_001134944;NR_024135;NR_024133;NR_024136;NR_024138;NR_024132;NM_001134945;NR_024134	-0.104765	0.0481874
chr12	122986080	cg10857250	ZCCHC8	NM_017612	-0.133664	0.0481892
chr10	35480749	cg17679427	CREM	NM_182769;NM_182770;NM_182853;NM_183011;NM_183013;NM_182772;NM_183060;NM_181571;NM_182850;NM_183012;NM_182771	-0.136268	0.0481892
chr2	118737667	cg24475517	CCDC93	NM_019044	-0.16764	0.0482207
chr1	59039556	cg21113746			0.113475	0.0482273
chr13	77298665	cg24933919			-0.12028	0.048239
chr12	22843015	cg10456459	ETNK1	NM_018638	-0.177585	0.0483952
chr7	142920096	cg05862438	TAS2R40	NM_176882	-0.100416	0.0483974
chr4	81117016	cg04858148	PRDM8	NM_020226	-0.128248	0.0483989
chr1	177001793	cg25104727	ASTN1	NM_207108;NM_004319	-0.132018	0.0483989
chr10	126314680	cg04426802	FAM53B	NM_014661	0.191503	0.0483989
chr3	109057509	cg12443195	DPPA4	NM_018189	-0.105158	0.0483989
chr4	155702411	cg08282428	RBM46	NM_144979	-0.160374	0.0484047
chr5	126407100	cg00207226	FLJ44606	NM_001164478;NM_001164479	-0.105109	0.0484138
chr2	68917482	cg18670846			-0.112864	0.0484571
chr5	10445523	cg11080651	ROPN1L	NM_031916	-0.10184	0.0484685
chr1	40105687	cg17602126	HEYL	NM_014571	-0.108491	0.0484751
chr7	2764246	cg15247329			0.126835	0.0485511
chr11	6598119	cg15511120			-0.167455	0.0485643
chr3	119315532	cg12806353	PLA1A	NM_015900	-0.107978	0.0485643
chr11	70257149	cg16061668	CTTN	NM_138565;NM_005231	-0.14867	0.0485701
chr3	196325552	cg15346242			-0.127501	0.0485701
chr1	206669785	cg11739399	IKBKE	NM_014002	-0.123101	0.0485747
chr7	4244250	cg02004499	SDK1	NR_027816;NM_152744	-0.14596	0.0485747
chr16	30485597	cg16391678	ITGAL	NM_002209;NM_001114380	0.129496	0.0485747
chr22	43544017	cg12489775			-0.124654	0.0485747
chr2	240162323	cg10094994	HDAC4	NM_006037	-0.154548	0.0485797
chr7	57071676	cg21634283			-0.223305	0.0486552
chr3	188399479	cg06739107	LPP	NM_005578;NM_001167671;NM_001167672	-0.181265	0.0486898
chr7	99683264	cg06257058			-0.165145	0.0486898
chr6	31584223	cg04812347	AIF1	NM_004847;NM_032955;NM_001623	-0.143138	0.0486965
chr5	151057860	cg26389330	SPARC	NM_003118	-0.139691	0.0486965
chr17	58499706	cg04413853	C17orf64	NM_181707	-0.109348	0.0487117
chr1	228967124	cg26188212			0.108367	0.0487163
chr6	30624478	cg01211396	DHX16	NM_001164239;NM_003587	-0.142186	0.0487163
chr21	47547796	cg00159953	COL6A2	NM_058175;NM_001849;NM_058174	-0.204507	0.0487386
chr11	61598330	cg25324164	FADS2	NM_004265	-0.105109	0.0487386
chr17	4079306	cg12077963	ANKFY1	NM_016376	0.140292	0.0488045
chr5	82675005	cg06885823			-0.154237	0.0488766
chr3	10334760	cg03920999	GHRLOS	NR_024146;NR_024132;NM_001134946;NR_004431;NR_024145;NR_024136;NR_024133;NR_024137;NM_001134944;NR_024134;NR_024144;NM_001134945;NR_024138;NR_024135	-0.123036	0.0489071
chr4	54518744	cg12114584			0.10077	0.0489071
chr1	38462546	cg26528311	FHL3	NM_004468	-0.126363	0.0489227
chr11	46879516	cg23595304	LRP4	NM_002334	-0.141028	0.0489332
chr8	28618150	cg13518537			-0.112562	0.0489542
chr12	93530780	cg00593607			-0.169898	0.0489542
chr4	78114790	cg11986756			-0.113996	0.0489542
chr14	24562064	cg10264529	PCK2	NM_001018073;NM_004563	-0.128271	0.0489542
chr22	23441402	cg17176676	RTDR1	NM_014433;NM_002073	0.110456	0.04897
chr3	195342063	cg25512381			0.101369	0.0489882
chr12	66635398	cg12866960	IRAK3	NM_001142523;NM_007199	-0.175015	0.0489882
chr12	123518888	cg01816936	PITPNM2	NM_020845	-0.124365	0.0490177
chr7	158750985	cg00413089			0.19227	0.0490177
chr3	11267525	cg17571559	HRH1	NM_001098213;NM_001098211;NM_001098212	-0.132477	0.0490256
chr10	51575763	cg16814786	NCOA4	NM_005437;NM_001145263;NM_001145261;NM_001145262;NM_001145260	-0.134378	0.0490491
chr17	72709026	cg15374234	CD300LF	NM_139018;NM_175738;NM_139018	-0.115261	0.0490753
chr9	130616110	cg01937819	ENG	NM_001114753;NM_000118	-0.103621	0.0491414
chr4	95264127	cg27186013	HPGDS	NM_014485	-0.130237	0.0491414
chr2	65089000	cg22900266			-0.121928	0.049147
chr6	44020245	cg12481212			-0.134129	0.049147
chr12	49071788	cg05580141	C12orf41	NM_017822	-0.184793	0.0491658
chr2	119699682	cg11009736	MARCO	NM_006770	-0.105864	0.0491682
chr19	35939561	cg21640432	FFAR2	NM_005306	-0.118728	0.0491682
chr12	54690793	cg24762231	NFE2	NM_006163;NM_001136023	-0.154314	0.0491682
chr21	34773372	cg06287548			-0.159003	0.0491682
chr17	35457385	cg15939920	ACACA	NM_198838;NM_198839;NM_198837;NM_198834;NM_198836	-0.129522	0.0491682
chr1	19401069	cg16265859	UBR4	NM_020765	0.12338	0.0491682
chr1	181097897	cg12903530			-0.118805	0.0491682
chr17	8762014	cg00409104	PIK3R6	NM_001010855	-0.120297	0.0491699
chr17	76876206	cg13694343	TIMP2	NM_003255	-0.138277	0.0491699
chr14	81978021	cg13062455	SEL1L	NM_005065	-0.143706	0.0491823
chr11	34322226	cg13289202	ABTB2	NM_145804	-0.140967	0.0491839
chr1	26881009	cg11377047	MIR1976	NR_031740;NM_001006665;NM_002953	-0.131281	0.0492067
chr11	2322808	cg22210337	C11orf21	NR_024621;NM_139022;NM_001142946	-0.111024	0.0492303
chr11	3648013	cg00476955	TRPC2	NR_002720	-0.119742	0.0492303
chr12	123518833	cg14644204	PITPNM2	NM_020845	-0.126953	0.049258
chr1	57001742	cg11959316	PPAP2B	NM_177414;NM_003713	0.103413	0.0492593
chr2	173539262	cg00568384			-0.138422	0.0492618
chr5	55148493	cg07363330	IL31RA	NM_139017	-0.148053	0.0493383
chr11	67350195	cg23725454	GSTP1	NM_000852	-0.102665	0.0493383
chr15	94841112	cg02700491	MCTP2	NM_001159643;NM_018349	-0.151986	0.0493383
chr7	150061328	cg21108554			-0.121699	0.0493836
chr10	90519680	cg25907743	LIPN	NM_001102469	-0.104731	0.049389
chr16	4427428	cg26457890	VASN	NM_138440;NM_024535	0.104175	0.0494081
chr1	151297900	cg06122613	PI4KB	NM_002651	-0.114879	0.0494194
chr17	7035367	cg11316905			-0.113875	0.0494362
chr7	102065448	cg22152931	PRKRIP1	NM_024653	-0.121223	0.0494624
chr11	76887139	cg17355865	MYO7A	NM_000260;NM_001127180;NM_001127179	-0.148099	0.0494624
chr15	45028270	cg10439456	TRIM69	NM_080745;NM_182985	-0.107153	0.0494624
chr1	246378510	cg25025181	SMYD3	NM_022743;NM_001167740	-0.165144	0.0494624
chr6	28874479	cg20544852	TRIM27	NM_006510	-0.179722	0.0494624
chr6	16513829	cg24776142	ATXN1	NM_001128164;NM_000332	-0.114557	0.0494625
chr12	1922067	cg02929855	CACNA2D4	NM_172364	-0.157931	0.0494625
chr10	101686925	cg09045574	DNMBP	NM_015221;NR_024130	-0.100686	0.0495418
chr2	206628625	cg05348875	NRP2	NM_201279;NM_018534;NM_201267;NM_003872;NM_201266	0.121339	0.0495418
chr2	174924430	cg17258387			-0.11524	0.0496071
chr14	22361282	cg16702660			-0.414009	0.0496071
chr15	100105188	cg04219504	MEF2A	NM_001130927;NM_005587;NM_001130926	-0.112683	0.0496084
chr2	239463774	cg01763719			-0.168083	0.0496654
chr20	62367888	cg00446123	LIME1	NM_017806	0.181617	0.0496755
chr11	60145275	cg10853416	MS4A7	NM_206939;NM_206938;NM_206940;NM_021201	-0.143319	0.0496755
chr6	30624502	cg21513254	DHX16	NM_001164239;NM_003587	-0.125353	0.0496802
chr11	119468660	cg17095460			0.299972	0.0497134
chr19	37825406	cg24834889	HKR1	NM_181786	0.14193	0.0497157
chr11	62574403	cg21702188	STX5	NM_003164;NM_006362;NM_001081491	-0.109378	0.0497157
chr20	50109099	cg02263932	NFATC2	NM_001136021;NM_173091;NM_012340	-0.106011	0.0497358
chr15	78933820	cg17179314	CHRNB4	NM_000750	0.18736	0.0497358
chr1	33505458	cg26419676			-0.112766	0.0497358
chr15	72690734	cg10724690	TMEM202	NM_001080462	-0.107036	0.0497358
chr2	43188940	cg21514164			-0.116643	0.0497358
chr14	93653027	cg07481273	C14orf109	NM_001098621;NM_015676	-0.154555	0.0497358
chr11	9587743	cg25225070			0.108411	0.0497358
chr12	65672031	cg23378033	MSRB3	NM_198080;NM_001031679	-0.141778	0.0497358
chr6	5087604	cg11092486			-0.160302	0.0497358
chr11	46383924	cg02211741	DGKZ	NM_201533;NM_001105540;NM_003646;NM_201532	-0.106204	0.0497615
chr2	118982679	cg18859174			-0.109308	0.0497615
chr15	86167192	cg12412575	AKAP13	NM_007200;NM_006738	-0.101839	0.0497615
chr16	8738531	cg03408945	C16orf68	NM_024109	-0.139296	0.0497615
chr8	142297175	cg26610247			-0.108125	0.0497615
chr20	45179354	cg17775490	C20orf123	NM_080721	-0.130133	0.0497615
chr16	50743296	cg05261686	NOD2	NM_022162	-0.120985	0.0497739
chr1	171283893	cg02694395	FMO4	NM_002022	-0.111798	0.0497739
chr7	101535821	cg23445003	CUX1	NM_181500;NM_181552;NM_001913	-0.171887	0.0497739
chr10	99125814	cg25023095	RRP12	NM_001145114;NM_015179	-0.114023	0.0498222
chr6	29454623	cg12423733	MAS1L	NM_052967	-0.12378	0.0498405
chr1	222927856	cg13378649			-0.114349	0.0498423
chr11	112000518	cg07691897			-0.142177	0.049872
chr11	59824089	cg03348161	MS4A3	NM_006138;NM_001031666;NM_001031809	-0.148838	0.0499048
chr2	173159062	cg12345526			-0.13033	0.0499048
chr6	7169632	cg07714276	RREB1	NM_001003700;NM_001003699;NM_001168344;NM_001003698	-0.108913	0.0499081
chr4	78114737	cg18837947			-0.119857	0.049974
